# Supplementary material for: A thermo-regulated highly regioselective mono and dihalogenations of phenols and anilines in water employing new Lewis base adducts (LBAs) [DBUBr]+Br− and [DBUI]+I− as green reagents: a simple approach
Source: Royal Society of Chemistry journal article supplement (doi:10.1039/d3nj03370h), 2023-01-01
Supplement: d3nj03370h1.pdf [file d3nj03370h1.pdf]

# **A Thermo-regulated Highly Regioselective Mono and Dihalogenations of Phenols and Anilines in Water Employing New Lewis Base Adducts (LBAs) [DBUBr]<sup>+</sup>Br<sup>-</sup> and [DBUI]<sup>+</sup>I<sup>-</sup> As Green Reagents; A Simple Approach**

Vijayalaxmi Gavinolla,<sup>a</sup> Swathi Thangalipalli,<sup>a</sup> Siddarama Goud Bandalla,<sup>b</sup> Ramaraju Panduga<sup>b</sup> and Chandra Kiran Neella<sup>\*a</sup>

<sup>a</sup>Dept. of Chemistry, Palamuru University, Mahbubnagar, Telangana, India 509001.

<sup>b</sup>Dept. of Integrated Chemistry, Palamuru University, Mahbubnagar, Telangana, India 509001.

## **Table of Contents**

|                                                                                          |           |
|------------------------------------------------------------------------------------------|-----------|
| <b>General Information .....</b>                                                         | <b>2</b>  |
| <b>Description of Products.....</b>                                                      | <b>2</b>  |
| <b>Copies of <sup>1</sup>H <sup>13</sup>C{<sup>1</sup>H} and IR Spectra of LBAs.....</b> | <b>19</b> |
| <b>IR spectra of LBAs 2 and 3 .....</b>                                                  | <b>90</b> |

**General Considerations.** All solvents were treated according to standard methods. Commercial reagents were purchased from AVRA, Merck and TCCI and used without further purification unless otherwise stated. Solvents, unless otherwise specified, were reagent grade and distilled once prior to use.  $^1\text{H}$ -NMR spectra were recorded at 400 MHz (Varian);  $^{13}\text{C}$  NMR spectra were recorded at 100 MHz (Varian).  $^1\text{H}$ -NMR chemical shifts are calibrated using residual undeuterated solvents  $\text{CHCl}_3$  ( $\delta = 7.26$  ppm), DMSO ( $\delta = 2.50$  ppm)  $^{13}\text{C}$ -NMR chemical shifts for  $^{13}\text{C}$ -NMR are reported relative to the central  $\text{CHCl}_3$  ( $\delta = 77.16$  ppm) or DMSO ( $\delta = 39.52$  ppm). Coupling constants are given in Hz. Elemental analyses was done using Elementar Vario EL Cube.

### **General Procedure for the preparation of 2 and 3:**

To an ice cold solution of DBU (1.0 equiv) in ethyl acetate (10 mL) was added a solution of reagent (1.1 equiv) in ethyl acetate (5 mL) slowly drop by drop through addition funnel. After addition the reaction mass was warmed to rt and stirred for 30 min. The resultant solid was filtered through Buchner funnel and washed successively with ethyl acetate (10 mL) and ether (10 mL). The solid thus obtained was thoroughly dried under vacuum to furnish different LBAs.

### **General Experimental procedure for monohalogenation:**

To a stirred solution/suspension of phenol/aniline derivative (5.0 mmol) in water (7 mL) at temperature mentioned in table was added reagent **5** (5.5 mmol) and stirred until completion (TLC). The resultant solid was filtered through syntered disc and washed thoroughly with water (5 mL) and dried under vacuum to produce solid products. The solids were recrystallised from ethanol/ether.

### **General Experimental procedure for dihalogenation:**

To a stirred solution/suspension of phenol/aniline derivative (5.0 mmol) in water (3 mL) at temperature mentioned in table was added reagent **2/3** (10.5 mmol) and stirred until completion (TLC). The resultant solid was filtered through syntered disc and washed thoroughly with water (5 mL) and dried under vacuum to produce solid products. The solids were recrystallised from ethanol/ether. For liquid products the aqueous layer was extracted into ethylacetate (2 x 10 mL). combined organic layers were dried using  $\text{Na}_2\text{SO}_4$  and evaporated under vacuum to furnish pure products.

### **Procedure for recovery of DBU:**

The aqueous layer was basified with aq. NaOH and extracted into ethyl acetate. The organic layers were evaporated under vacuum to obtain DBU which was reused again for preparation of LBAs.

|                                                                                     |                                                                                                                                                                                                                                                                                                                                                                                                                                                                                                                                                                                                                                                                             |
|-------------------------------------------------------------------------------------|-----------------------------------------------------------------------------------------------------------------------------------------------------------------------------------------------------------------------------------------------------------------------------------------------------------------------------------------------------------------------------------------------------------------------------------------------------------------------------------------------------------------------------------------------------------------------------------------------------------------------------------------------------------------------------|
| 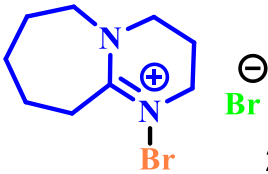   | <p><b>MP</b> = 140-143 °C.</p> <p><b><sup>1</sup>H NMR (400 MHz, in CDCl<sub>3</sub>):</b> δ 3.73 – 3.43 (m, 6H), 3.02-2.93 (m, 2H), 2.16 (s, 2H), 1.90–1.66 (m, 6H).</p> <p><b><sup>13</sup>C NMR (100 MHz, in CDCl<sub>3</sub>):</b> δ 168.0, 167.8, 62.3, 55.6, 55.2, 49.6, 48.9, 29.3, 28.2, 25.7, 22.4, 20.0, 14.0.</p> <p><b>IR (film) ν<sub>max</sub>:</b> 1193, 1253, 1325, 1627, 1724, 2935, 3446 cm<sup>-1</sup>. <b>Mass (ESI-MS):</b> 312.05 [M<sup>+</sup>].</p> <p><b>CHN:</b> Expected for C<sub>9</sub>H<sub>16</sub>Br<sub>2</sub>N<sub>2</sub>; C, 34.64; H, 5.17; N, 8.98; Br, 51.21; Found: C, 34.67; H, 5.15; N, 8.96; Br, 51.26.</p>                  |
|    | <p><b>MP</b> = 161-164 °C.</p> <p><b><sup>1</sup>H NMR (400 MHz, in CDCl<sub>3</sub>):</b> δ 3.64 (dd, <i>J</i> = 12.7, 7.2 Hz, 4H), 3.54 (s, 2H), 2.98 (s, 2H), 2.23 – 2.11 (m, 2H), 1.82 (d, <i>J</i> = 23.4 Hz, 6H).</p> <p><b><sup>13</sup>C NMR (100 MHz, in CDCl<sub>3</sub>):</b> δ 166.2, 55.3, 49.2, 38.4, 33.6, 28.9, 26.7, 24.0, 19.6.</p> <p><b>IR (film) ν<sub>max</sub>:</b> 1319, 1481, 1643, 2935, 3118 cm<sup>-1</sup>.</p> <p><b>Mass (ESI-MS):</b> 405.94 [M<sup>+</sup>].</p> <p><b>CHN:</b> Expected for C<sub>9</sub>H<sub>16</sub>I<sub>2</sub>N<sub>2</sub>; C, 26.62; H, 3.97; N, 8.78; I, 62.97; Found: C, 26.58; H, 3.92; N, 8.75; I, 62.96.</p> |
|  | <p><b>MP</b> = 62-64 °C.</p> <p><b><sup>1</sup>H NMR (400 MHz, in CDCl<sub>3</sub>):</b> 7.23 (d, <i>J</i> = 8.8 Hz, 2H), 6.56 (d, <i>J</i> = 8.8 Hz, 2H), 3.69 (s, 2H).</p> <p><b><sup>13</sup>C NMR (100 MHz, in CDCl<sub>3</sub>):</b> 145.4, 131.98, 116.68, 110.17.</p> <p><b>Mass (ESI-MS):</b> 172.0 [M<sup>+</sup>].</p> <p><b>CHN:</b> Expected for C<sub>6</sub>H<sub>6</sub>BrN; C, 41.89; H, 3.52; Br, 46.45; N, 8.14; Found: C, 41.92; H, 3.58; Br, 46.50, N, 8.19.</p>                                                                                                                                                                                        |
|  | <p><b>MP</b> = 56-59 °C.</p> <p><b><sup>1</sup>H NMR (400 MHz, in CDCl<sub>3</sub>):</b> 7.87 (d, <i>J</i> = 6.7 Hz, 1H), 7.28 (t, <i>J</i> = 5.9 Hz, 1H), 7.12 (t, <i>J</i> = 7.3 Hz, 1H), 7.07 (d, <i>J</i> = 7.8 Hz, 1H).</p> <p><b><sup>13</sup>C NMR (100 MHz, in CDCl<sub>3</sub>):</b> 134.5, 129.4, 129.2, 125.6, 125.6, 118.7;</p> <p><b>Mass (ESI-MS):</b> 218.95 [M<sup>+</sup>].</p> <p><b>CHN:</b> Expected for C<sub>6</sub>H<sub>6</sub>IN; C, 32.90; H, 2.76; I, 57.94; N, 6.40; Found: C, 32.47; H, 2.84; I, 57.57, N, 6.77.</p>                                                                                                                           |
|  | <p><b>MP</b> = 78-79 °C.</p> <p><b><sup>1</sup>H NMR (400 MHz, in CDCl<sub>3</sub>):</b> 7.53 (d, <i>J</i> = 2.0 Hz, 1H), 7.19 (dd, <i>J</i> = 8.4 &amp; 2.0 Hz, 1H), 6.64 (d, <i>J</i> = 8.4 Hz, 1H), 4.10 (s, 2H).</p> <p><b><sup>13</sup>C NMR (100 MHz, in CDCl<sub>3</sub>):</b> 149.8, 129.2, 128.0, 124.9, 113.5, 107.0.</p> <p><b>Mass (ES-MS):</b> 250.88 [M<sup>+</sup>].</p> <p><b>CHN:</b> Expected for C<sub>6</sub>H<sub>5</sub>Br<sub>2</sub>N; C, 41.89; H, 3.52; Br, 46.45; N, 8.14; Found: C, 41.92; H, 3.58; Br, 46.50, N, 8.19.</p>                                                                                                                     |

|                                                                                               |                                                                                                                                                                                                                                                                                                                                                                                                                                                                                                                                             |
|-----------------------------------------------------------------------------------------------|---------------------------------------------------------------------------------------------------------------------------------------------------------------------------------------------------------------------------------------------------------------------------------------------------------------------------------------------------------------------------------------------------------------------------------------------------------------------------------------------------------------------------------------------|
| 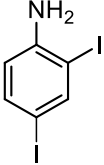 <p>4d</p>   | <p><b>MP</b> = 93-95 °C.</p> <p><b><sup>1</sup>H NMR (400 MHz, CDCl<sub>3</sub>):</b> δ 7.53 (d, <i>J</i> = 2.2 Hz, 1H), 7.20 (dd, <i>J</i> = 8.5, 2.2 Hz, 1H), 6.24 (d, <i>J</i> = 8.5 Hz, 1H), 4.09 (s, 2H).</p> <p><b><sup>13</sup>C NMR (100 MHz, CDCl<sub>3</sub>):</b> δ 146.7, 139.4, 130.2, 119.7, 86.1, 85.3</p> <p><b>Mass (ESI-MS):</b> 344.85 [M<sup>+</sup>].</p> <p><b>CHN:</b> Expected for C<sub>6</sub>H<sub>5</sub>I<sub>2</sub>N; C, 20.89; H, 1.46; I, 73.58; N, 4.06; Found; C, 20.80; H, 1.49; I, 73.55; N, 4.55.</p> |
|  <p>5a</p>   | <p><b>MP</b> = 65-67 °C.</p> <p><b><sup>1</sup>H NMR (400 MHz, in CDCl<sub>3</sub>):</b> 7.32 (d, <i>J</i> = 8.8 Hz, 2H), 6.72 (d, <i>J</i> = 8.8 Hz, 2H), 5.03 (s, 1H);</p> <p><b><sup>13</sup>C NMR (100 MHz, in CDCl<sub>3</sub>):</b> 154.7, 132.5, 117.2, 112.8.</p> <p><b>Mass (ESI-MS):</b> 172.0 [M<sup>+</sup>].</p> <p><b>CHN:</b> Expected for C<sub>6</sub>H<sub>5</sub>BrO; C, 41.65; H, 2.91; Br, 46.18; Found: C, 41.62; H, 2.94; Br, 46.15.</p>                                                                             |
|  <p>5b</p>   | <p><b>MP</b> = 37-40 °C.</p> <p><b><sup>1</sup>H NMR (400 MHz, CDCl<sub>3</sub>):</b> δ 7.66 (dd, <i>J</i> = 7.9, 1.4 Hz, 1H), 7.23 (d, <i>J</i> = 1.4 Hz, 1H), 7.00 (dd, <i>J</i> = 8.1, 1.4 Hz, 1H), 6.84 (m, 1H), 5.28 (s, 1H).</p> <p><b><sup>13</sup>C NMR (100 MHz, CDCl<sub>3</sub>):</b> δ 154.7, 138.2, 130.2, 122.4, 115.1, 85.7.</p> <p><b>Mass [ESI-MS]:</b> 219.94 [M<sup>+</sup>].</p> <p><b>CHN:</b> Expected for C<sub>6</sub>H<sub>5</sub>IO; C, 32.76; H, 2.29; I, 57.68; Found; C, 32.70; H, 2.30; I, 55.65.</p>         |
|  <p>5c</p> | <p><b>MP</b> = 38-40 °C.</p> <p><b><sup>1</sup>H NMR (400 MHz, in CDCl<sub>3</sub>):</b> 7.59 (d, <i>J</i> = 2.0 Hz, 1H), 7.32 (dd, <i>J</i> = 8.8 &amp; 2.0 Hz, 1H), 6.91 (d, <i>J</i> = 8.8 Hz, 1H), 5.49 (s, 1H).</p> <p><b><sup>13</sup>C NMR (100 MHz, in CDCl<sub>3</sub>):</b> 152.7, 133.9, 129.2, 113.5, 110.3.</p> <p><b>Mass (ESI-MS):</b> 249.0 [M<sup>+</sup>].</p> <p><b>CHN:</b> Expected for C<sub>6</sub>H<sub>4</sub>Br<sub>2</sub>O; C, 28.61; H, 1.60; Br, 63.44; Found: C, 28.62; H, 1.64; Br, 63.38.</p>              |
|  <p>5d</p> | <p><b>MP</b> = 68-70 °C.</p> <p><b><sup>1</sup>H NMR (400 MHz, CDCl<sub>3</sub>):</b> δ 7.85 (s, 1H), 7.53 (d, <i>J</i> = 6.2 Hz, 1H), 6.29 (d, <i>J</i> = 5.2 Hz, 1H), <b>5.25 (s, 1H).</b></p> <p><b><sup>13</sup>C NMR (100 MHz, CDCl<sub>3</sub>):</b> δ 153.5, 136.7, 128.8, 115.1, 85.7, 83.2.</p> <p><b>Mass (ESI-MS):</b> 345.84 [M<sup>+</sup>].</p> <p><b>CHN:</b> Expected for C<sub>6</sub>H<sub>4</sub>I<sub>2</sub>O<sub>2</sub>; C, 20.83; H, 1.17; I, 73.38; Found; C, 20.80; H, 1.19; I, 73.34.</p>                        |
|  <p>6a</p> | <p><b><sup>1</sup>H NMR (400 MHz, in CDCl<sub>3</sub>):</b> 7.23 (s, 1H), 6.90 (d, <i>J</i> = 8.0 Hz, 1H), 6.67 (d, <i>J</i> = 8.0 Hz, 1H), 2.22 (s, 3H).</p> <p><b><sup>13</sup>C NMR (100 MHz, in CDCl<sub>3</sub>):</b> 143.2, 134.5, 131.2, 129.3, 116.7, 109.6, 23.3.</p> <p><b>Mass (ESI-MS):</b> 186.1 [M<sup>+</sup>].</p> <p><b>CHN:</b> Expected for C<sub>7</sub>H<sub>8</sub>BrN; C, 45.19; H, 4.33; Br, 42.95; N, 7.53; Found: C, 45.21; H, 4.36; Br, 42.98; N, 7.48.</p>                                                      |

|                                                                                               |                                                                                                                                                                                                                                                                                                                                                                                                                                                                                                                              |
|-----------------------------------------------------------------------------------------------|------------------------------------------------------------------------------------------------------------------------------------------------------------------------------------------------------------------------------------------------------------------------------------------------------------------------------------------------------------------------------------------------------------------------------------------------------------------------------------------------------------------------------|
| 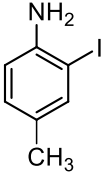 <p>6b</p>   | <p><b>MP</b> = 39-41 °C.</p> <p><b><sup>1</sup>H NMR (400 MHz, CDCl<sub>3</sub>):</b> δ 7.47 (s, 1H), 6.94 (d, <i>J</i> = 7.1 Hz, 1H), 6.66 (d, <i>J</i> = 8.1 Hz, 1H), 3.13 (s, 2H), 2.20 (s, 3H).</p> <p><b><sup>13</sup>C NMR (100 MHz, CDCl<sub>3</sub>):</b> δ 144.2, 139.0, 130.0, 129.5, 114.7, 84.3, 19.8.</p> <p><b>Mass (ESI-MS):</b> 232.97 [M<sup>+</sup>].</p> <p><b>CHN:</b> Expected for C<sub>7</sub>H<sub>8</sub>IN; C, 36.08; H, 3.46; I, 54.45; N; 6.01; Found; C, 36.11; H, 3.40; I, 54.44; N; 6.06.</p> |
|  <p>6c</p>   | <p><b>MP</b> = 74-75 °C.</p> <p><b><sup>1</sup>H NMR (400 MHz, in CDCl<sub>3</sub>):</b> 7.19 (s, 2H), 4.38 (s, 2H), 2.20 (s, 3H).</p> <p><b><sup>13</sup>C NMR (100 MHz, in CDCl<sub>3</sub>):</b> 151.7, 136.8, 133.9, 120.3, 18.7.</p> <p><b>Mass (ESI-MS):</b> 264.9, [M<sup>+</sup>].</p> <p><b>CHN:</b> Expected for C<sub>7</sub>H<sub>7</sub>Br<sub>2</sub>N; C, 31.73; H, 2.66; Br, 60.32; N, 5.29; Found: C, 31.76; H, 2.64; Br, 60.28; N, 5.32.</p>                                                               |
|  <p>6d</p>   | <p><b>MP</b> = 85-87 °C.</p> <p><b><sup>1</sup>H NMR (400 MHz, CDCl<sub>3</sub>):</b> δ 7.25 (s, 2H), 4.38 (s, 2H), 2.25 (s, 3H).</p> <p><b><sup>13</sup>C NMR (100 MHz, CDCl<sub>3</sub>):</b> δ 139.6, 132.2, 129.4, 85.3, 19.8.</p> <p><b>Mass (ESI-MS):</b> 358.87 [M<sup>+</sup>]</p> <p><b>CHN:</b> Expected for C<sub>7</sub>H<sub>7</sub>I<sub>2</sub>N; C, 23.42; H, 1.97; I, 70.71; N, 3.90; Found; C, 23.40; H, 1.95; I, 70.70; N, 3.94.</p>                                                                      |
|  <p>7a</p> | <p><b>MP</b> = 210-214 °C.</p> <p><b><sup>1</sup>H NMR (400 MHz, in CDCl<sub>3</sub>):</b> 7.26 (s, 1H), 7.00 (dd, <i>J</i> = 8.2, 1.2 Hz, 1H), 6.90 (d, <i>J</i> = 8.2 Hz, 1H), 5.33 (s, 1H), 2.26 (s, 3H);</p> <p><b>Mass (ESI-MS):</b> 187.03 [M<sup>+</sup>]</p> <p><b>CHN:</b> Expected for C<sub>7</sub>H<sub>7</sub>BrO; C, 44.95; H, 3.77; Br, 42.72; Found: C, 44.98; H, 3.80; Br, 42.70.</p>                                                                                                                       |
|  <p>7b</p> | <p><b>MP</b> = 34-36 °C.</p> <p><b><sup>1</sup>H NMR (400 MHz, CDCl<sub>3</sub>):</b> δ 7.47 (s, 1H), 7.04 (d, <i>J</i> = 8.2 Hz, 1H), 6.87 (d, <i>J</i> = 8.2 Hz, 1H), 5.16 (s, 1H), 2.25 (s, 3H).</p> <p><b><sup>13</sup>C NMR (100 MHz, in CDCl<sub>3</sub>):</b> 154.2, 144.2, 134.3, 130.0, 114.7, 84.3, 19.8.</p> <p><b>Mass (ESI-MS):</b> 233.95 [M<sup>+</sup>]</p> <p><b>CHN:</b> Expected for C<sub>7</sub>H<sub>7</sub>IO; C, 35.92; H, 3.01; I, 54.22; Found: C, 35.90; H, 3.11; I, 54.20.</p>                   |
|  <p>7c</p> | <p><b>MP</b> = 46-48 °C.</p> <p><b><sup>1</sup>H NMR (400 MHz, in CDCl<sub>3</sub>):</b> δ 7.49 (s, 2H), 5.57 (s, 1H), 2.25 (s, 3H).</p> <p><b>Mass (ESI-MS):</b> 327.77 [M<sup>+</sup>].</p> <p><b>CHN:</b> Expected for C<sub>7</sub>H<sub>6</sub>OBr<sub>2</sub>; C, 31.62; H, 2.27; Br, 60.09; Found: 31.63; H, 2.24; Br, 60.10.</p>                                                                                                                                                                                     |

|                                                                                           |                                                                                                                                                                                                                                                                                                                                                                                                                                                                                                                                               |
|-------------------------------------------------------------------------------------------|-----------------------------------------------------------------------------------------------------------------------------------------------------------------------------------------------------------------------------------------------------------------------------------------------------------------------------------------------------------------------------------------------------------------------------------------------------------------------------------------------------------------------------------------------|
| 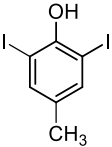<br>7d   | <p><b>MP</b> = 59-61 °C.</p> <p><b><sup>1</sup>H NMR (400 MHz, CDCl<sub>3</sub>):</b> δ 7.53 (s, 2H), 5.55 (s, 1H), 2.22 (s, 3H).</p> <p><b><sup>13</sup>C NMR (100 MHz, in CDCl<sub>3</sub>):</b> 139.6, 132.2, 129.4, 82.0, 19.8.</p> <p><b>Mass (ESI-MS):</b> 359.85 [M<sup>+</sup>].</p> <p><b>CHN:</b> Expected for C<sub>7</sub>H<sub>6</sub>I<sub>2</sub>O; C, 23.36; H, 1.68; I, 70.52; Found; C, 23.32; H, 1.60; I, 70.55.</p>                                                                                                       |
| <br>8a   | <p><b>MP</b> = 151-153 °C.</p> <p><b><sup>1</sup>H NMR (400 MHz, in CDCl<sub>3</sub>):</b> 7.31 (d, <i>J</i> = 2.4 Hz, 1H), 6.97 (d, <i>J</i> = 9.0 Hz, 1H), 6.83 (dd, <i>J</i> = 9.0, 2.4 Hz, 1H).</p> <p><b><sup>13</sup>C NMR (100 MHz, in CDCl<sub>3</sub>):</b> 143.3, 134.5, 122.7, 119.8, 118.9, 116.7.</p> <p><b>Mass (ESI-MS):</b> 188.0 [M<sup>+</sup>].</p> <p><b>CHN:</b> Expected for C<sub>6</sub>H<sub>6</sub>BrNO; C, 38.33; H, 3.22; Br, 42.50; N, 7.45; Found: C, 38.36; H, 3.24; Br, 42.48, N, 7.41.</p>                   |
| <br>8b   | <p><b>MP</b> = 143-146 °C.</p> <p><b><sup>1</sup>H NMR (400 MHz, CDCl<sub>3</sub>):</b> δ 7.40 (d, <i>J</i> = 2.3 Hz, 1H), 7.07 (dd, <i>J</i> = 8.6, 2.3 Hz, 1H), 6.68 (d, <i>J</i> = 8.6 Hz, 1H), 4.07 (s, 2H).</p> <p><b>Mass (ESI-MS):</b> 234.95 [M<sup>+</sup>].</p> <p><b>CHN:</b> Expected for C<sub>6</sub>H<sub>6</sub>I NO; C, 30.66; H, 2.57; I, 54.00; N, 5.96; Found; C, 30.62; H, 2.54; I, 54.08; N, 5.98.</p>                                                                                                                  |
| <br>8c | <p><b>MP</b> = 156-158 °C.</p> <p><b><sup>1</sup>H NMR (400 MHz, in CDCl<sub>3</sub>):</b> 7.33 (s, 2H);</p> <p><b>Mass (ESI-MS):</b> 266.92 [M<sup>+</sup>].</p> <p><b>CHN:</b> Expected for C<sub>6</sub>H<sub>5</sub>Br<sub>2</sub>NO; C, 27.00; H, 1.89; Br, 59.87; N, 5.25; Found: C, 27.04; H, 1.93; Br, 59.85, N, 5.28.</p>                                                                                                                                                                                                            |
| <br>8d | <p><b><sup>1</sup>H NMR (400 MHz, CDCl<sub>3</sub>):</b> δ 7.23 (s, 2H).</p> <p><b><sup>13</sup>C NMR (100 MHz, in CDCl<sub>3</sub>):</b> 153.1, 141.1, 122.6, 120.1.</p> <p><b>Mass (ESI-MS):</b> 360.85 [M<sup>+</sup>].</p> <p><b>CHN:</b> Expected for C<sub>6</sub>H<sub>5</sub>I<sub>2</sub> NO; C, 19.97; H, 1.40; I, 70.32; N, 3.88; Found: C, 19.99; H, 1.42; I, 70.35; N, 3.89.</p>                                                                                                                                                 |
| <br>9a | <p><b>MP</b> = 62-64 °C.</p> <p><b><sup>1</sup>H NMR (400 MHz, CDCl<sub>3</sub>):</b> δ 6.99 (d, <i>J</i> = 1.8 Hz, 1H), 6.78 (dd, <i>J</i> = 7.1, 2.3 Hz, 1H), 6.45 (d, <i>J</i> = 8.1 Hz, 1H), 3.78 (s, 3H).</p> <p><b><sup>13</sup>C NMR (100 MHz, in CDCl<sub>3</sub>):</b> 151.7, 141.2, 120.7, 118.2, 117.8, 110.3, 51.0.</p> <p><b>Mass (ESI-MS):</b> 202.05 [M<sup>+</sup>].</p> <p><b>CHN:</b> Expected for C<sub>7</sub>H<sub>8</sub>BrNO; C, 41.61; H, 3.99; Br, 39.55; N, 6.93; Found; C, 41.62; H, 3.95; Br, 39.56; N, 6.94.</p> |

|                                                                                                |                                                                                                                                                                                                                                                                                                                                                                                                                                                                                 |
|------------------------------------------------------------------------------------------------|---------------------------------------------------------------------------------------------------------------------------------------------------------------------------------------------------------------------------------------------------------------------------------------------------------------------------------------------------------------------------------------------------------------------------------------------------------------------------------|
| 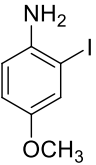 <p>9b</p>    | <p><b><sup>1</sup>H NMR (400 MHz, CDCl<sub>3</sub>):</b> δ 7.42 (s, 1H), 6.75 (d, <i>J</i> = 7.3 Hz, 1H), 6.47 (d, <i>J</i> = 7.3 Hz, 1H), 3.92 (s, 3H).<br/> <b>Mass (ESI-MS):</b> 248.97 [M<sup>+</sup>].<br/> <b>CHN:</b> Expected for C<sub>7</sub>H<sub>8</sub>INO; C, 33.76; H, 3.24; I, 50.96; N, 5.62; Found: C, 33.77; H, 3.23; I, 50.90; N, 5.60.</p>                                                                                                                 |
|  <p>9c</p>    | <p><b>MP</b> = 80-82 °C.<br/> <b><sup>1</sup>H NMR (400 MHz, CDCl<sub>3</sub>):</b> δ 6.98 (s, 2H), 3.86 (s, 3H).<br/> <b>Mass (ESI-MS):</b> 280.94 [M<sup>+</sup>].<br/> <b>CHN:</b> Expected for C<sub>7</sub>H<sub>7</sub>Br<sub>2</sub>NO; C, 29.93; H, 2.51; Br, 56.88; N, 4.99; Found: C, 29.91; H, 2.49; Br, 56.85; N, 4.97.</p>                                                                                                                                         |
|  <p>9d</p>    | <p><b><sup>1</sup>H NMR (400 MHz, CDCl<sub>3</sub>):</b> δ 7.26 (s, 2H), 3.82 (s, 3H).<br/> <b><sup>13</sup>C NMR (100 MHz, in CDCl<sub>3</sub>):</b> 153.1, 141.0, 122.6, 85.5, 54.4.<br/> <b>Mass (ESI-MS):</b> 374.86 [M<sup>+</sup>].<br/> <b>CHN:</b> Expected for C<sub>7</sub>H<sub>7</sub>I<sub>2</sub>NO; C, 22.426; H, 1.88; I, 67.69; N, 3.74; Found: C, 22.40; H, 1.84; I, 67.71; N, 3.72.</p>                                                                      |
|  <p>10a</p> | <p><b>MP</b> = 112-115 °C.<br/> <b><sup>1</sup>H NMR (400 MHz, in CDCl<sub>3</sub>):</b> δ 7.60 (d, <i>J</i> = 4.4 Hz, 1H), 5.94 (s, 2H).<br/> <b><sup>13</sup>C NMR (100 MHz, in CDCl<sub>3</sub>):</b> 150.6, 132.3, 115.5, 110.7.<br/> <b>Mass (ESI-MS):</b> 343.77 [M<sup>+</sup>].<br/> <b>CHN:</b> Expected for C<sub>6</sub>H<sub>3</sub>O<sub>2</sub>Br<sub>3</sub>; C, 20.78; H, 0.87; Br, 69.12; Found: C, 20.80; H, 0.89; Br, 69.19.</p>                             |
|  <p>10b</p> | <p><b>MP</b> = 140-142 °C.<br/> <b><sup>1</sup>H NMR (400 MHz, CDCl<sub>3</sub>):</b> δ 7.94 (s, 1H), 5.86 (s, 2H).<br/> <b><sup>13</sup>C NMR (100 MHz, in CDCl<sub>3</sub>):</b> 153.3, 146.6, 86.6, 80.6.<br/> <b>Mass (ESI-MS):</b> 487.73 [M<sup>+</sup>].<br/> <b>CHN:</b> Expected for C<sub>6</sub>H<sub>3</sub>I<sub>3</sub>O<sub>2</sub>; C, 14.77; H, 0.62; I, 78.05; Found: C, 14.78; H, 0.66; I, 78.09.</p>                                                        |
|  <p>11a</p> | <p><b>MP</b> = 96-99 °C.<br/> <b><sup>1</sup>H NMR (400 MHz, in CDCl<sub>3</sub>):</b> δ 7.63 (s, 1H), 6.52 (s, 2H), 2.59 (s, 3H).<br/> <b><sup>13</sup>C NMR (100 MHz, in CDCl<sub>3</sub>):</b> δ 201.92, 160.27, 155.51, 133.32, 115.21, 99.33, 98.87, 26.28.<br/> <b>Mass (ESI-MS):</b> 307.87 [M<sup>+</sup>].<br/> <b>CHN:</b> Expected for C<sub>8</sub>H<sub>6</sub>O<sub>3</sub>Br<sub>2</sub>; C, 31.00; H, 1.95; Br, 51.56; Found: C, 31.08; H, 1.98; Br, 51.50.</p> |

|                                                                                                |                                                                                                                                                                                                                                                                                                                                                                                                                                                                                                                                          |
|------------------------------------------------------------------------------------------------|------------------------------------------------------------------------------------------------------------------------------------------------------------------------------------------------------------------------------------------------------------------------------------------------------------------------------------------------------------------------------------------------------------------------------------------------------------------------------------------------------------------------------------------|
| 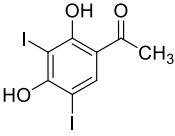 <p>11b</p>   | <p><b><sup>1</sup>H NMR (400 MHz, CDCl<sub>3</sub>):</b> δ 7.89 (s, 1H), 2.59 (s, 3H).<br/> <b><sup>13</sup>C NMR (100 MHz, in CDCl<sub>3</sub>):</b> 201.9, 161.2, 160.3, 136.5, 116.9, 81.7, 80.6, 26.3.<br/> <b>Mass (ESI-MS):</b> 403.84 [M<sup>+</sup>].<br/> <b>CHN:</b> Expected for C<sub>8</sub>H<sub>6</sub>I<sub>3</sub>O<sub>3</sub>; C, 23.79; H, 1.50; I, 62.83; Found; C, 23.76; H, 1.50; I, 62.89.</p>                                                                                                                   |
|  <p>12a</p>   | <p><b>MP = 108-110 °C.</b><br/> <b><sup>1</sup>H NMR (400 MHz, in CDCl<sub>3</sub>):</b> δ 8.27 (d, <i>J</i> = 2.3 Hz, 1H), 7.43 (dd, <i>J</i> = 8.9, 2.3 Hz, 1H), 6.73 (d, <i>J</i> = 8.9 Hz, 1H), 6.08 (s, 2H).<br/> <b>Mass (ESI-MS):</b> 215.95 [M<sup>+</sup>].<br/> <b>CHN:</b> Expected for C<sub>6</sub>H<sub>5</sub>N<sub>2</sub>O<sub>2</sub>Br; C, 33.21; H, 2.32; N, 12.91; Br, 36.82 Found: C, 33.29; H, 2.34; N, 12.96; Br, 36.93.</p>                                                                                     |
|  <p>12b</p>   | <p><b>MP = 120-123 °C.</b><br/> <b><sup>1</sup>H NMR (400 MHz, CDCl<sub>3</sub>):</b> δ 8.17 (s, 1H), 7.78 (dd, <i>J</i> = 8.9, 2.3 Hz, 1H), 6.73 (d, <i>J</i> = 8.9 Hz, 1H), 6.08 (s, 2H).<br/> <b><sup>13</sup>C NMR (100 MHz, in CDCl<sub>3</sub>):</b> 141.3, 140.9, 132.9, 128.2, 112.8, 78.7.<br/> <b>Mass (ESI-MS):</b> 263.94 [M<sup>+</sup>].<br/> <b>CHN:</b> Expected for C<sub>6</sub>H<sub>5</sub>IN<sub>2</sub>O<sub>2</sub>; C, 27.29; H, 1.91; I, 48.07; N, 10.61; Found: C, 27.25; H, 1.90; I, 48.17; N, 10.60.</p>     |
|  <p>12c</p> | <p><b>MP = 128-130 °C.</b><br/> <b><sup>1</sup>H NMR (400 MHz, in CDCl<sub>3</sub>):</b> δ 8.29 (d, <i>J</i> = 2.3 Hz, 1H), 7.81 (d, <i>J</i> = 2.3 Hz, 1H), 6.64 (s, 2H).<br/> <b>Mass (ESI-MS):</b> 293.86 [M<sup>+</sup>].<br/> <b>CHN:</b> Expected for C<sub>6</sub>H<sub>4</sub>N<sub>2</sub>O<sub>2</sub>Br<sub>2</sub>; C, 24.35; H, 1.36; N, 9.47; Br, 54.00 Found: C, 24.40; H, 1.39; N, 9.90; Br, 54.30.</p>                                                                                                                  |
|  <p>12d</p> | <p><b>MP = 136-138 °C.</b><br/> <b><sup>1</sup>H NMR (400 MHz, CDCl<sub>3</sub>):</b> δ 8.16 (d, <i>J</i> = 2.3 Hz, 2H), 5.25 (s, 2H).<br/> <b><sup>13</sup>C NMR (100 MHz, in CDCl<sub>3</sub>):</b> 150.2, 149.4, 140.9, 134.2, 86.8, 86.1.<br/> <b>Mass (ESI-MS):</b> 389.84 [M<sup>+</sup>].<br/> <b>CHN:</b> Expected for C<sub>6</sub>H<sub>4</sub>I<sub>2</sub>N<sub>2</sub>O<sub>2</sub>; C, 18.48; H, 1.03; I, 65.09; N, 7.18; Found; C, 18.50; H, 1.05; I, 65.12; N, 7.17.</p>                                                 |
|  <p>13a</p> | <p><b>MP = 109-112 °C.</b><br/> <b><sup>1</sup>H NMR (400 MHz, CDCl<sub>3</sub>):</b> δ 8.52 (d, <i>J</i> = 2.2 Hz, 1H), 7.76 (dd, <i>J</i> = 8.7, 2.3 Hz, 1H), 6.73 (d, <i>J</i> = 8.9 Hz, 1H).<br/> <b><sup>13</sup>C NMR (100 MHz, in CDCl<sub>3</sub>):</b> 150.6, 138.7, 136.8, 128.3, 124.2, 117.2.<br/> <b>Mass (ESI-MS):</b> 218.00 [M<sup>+</sup>].<br/> <b>CHN:</b> Expected for C<sub>6</sub>H<sub>4</sub>BrNO<sub>3</sub>; C, 33.06; H, 1.85; N, 9.47; Br, 36.65; Found; C, 33.08; H, 1.83; N, 9.45; Br, 36.62; N, 6.45.</p> |



|                                                                                                |                                                                                                                                                                                                                                                                                                                                                                                                                                                                                                                                                                       |
|------------------------------------------------------------------------------------------------|-----------------------------------------------------------------------------------------------------------------------------------------------------------------------------------------------------------------------------------------------------------------------------------------------------------------------------------------------------------------------------------------------------------------------------------------------------------------------------------------------------------------------------------------------------------------------|
| 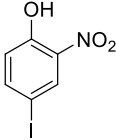 <p>13b</p>   | <p><b>MP</b> = 38-40 °C.</p> <p><b><sup>1</sup>H NMR (400 MHz, CDCl<sub>3</sub>):</b> δ 8.25 (s, 1H), 8.03 (d, <i>J</i> = 2.0 Hz, 1H), 6.93 (d, <i>J</i> = 2.0 Hz, 1H), 6.16 (s, 1H).</p> <p><b>Mass (ESI-MS):</b> 262.94 [M<sup>+</sup>].</p> <p><b>CHN:</b> Expected for C<sub>6</sub>H<sub>4</sub>INO<sub>3</sub>; C, 27.19; H, 1.52; I, 47.89; N, 5.29; Found C, 27.20; H, 1.50; I, 47.85; N, 5.25.</p>                                                                                                                                                           |
|  <p>13c</p>   | <p><b>MP</b> = 139-141 °C.</p> <p><b><sup>1</sup>H NMR (400 MHz, in CDCl<sub>3</sub>):</b> 11.05 (s, 1H), 8.25 (d, <i>J</i> = 2.4 Hz, 1H), 7.99 (d, <i>J</i> = 2.4 Hz, 1H).</p> <p><b><sup>13</sup>C NMR (100 MHz, in CDCl<sub>3</sub>):</b> 149.8, 141.3, 140.2, 128.0, 118.4, 116.6.</p> <p><b>Mass (ESI-MS):</b> 296.9 [M<sup>+</sup>].</p> <p><b>CHN:</b> Expected for C<sub>6</sub>H<sub>3</sub>Br<sub>2</sub>NO<sub>3</sub>; C, 24.27; H, 1.02; Br, 53.83; N, 4.72; Found: C, 24.25; H, 1.05; Br, 53.86; N, 4.69.</p>                                           |
|  <p>13d</p>   | <p><b>MP</b> = 155-157 °C.</p> <p><b><sup>1</sup>H NMR (400 MHz, CDCl<sub>3</sub>):</b> δ 11.05 (s, 1H), 8.25 (t, <i>J</i> = 8.4 Hz, 2H).</p> <p><b>Mass (ESI-MS):</b> 390.82 [M<sup>+</sup>].</p> <p><b>CHN:</b> Expected for C<sub>6</sub>H<sub>3</sub>I<sub>2</sub>NO<sub>3</sub>; C, 18.44; H, 0.77; I, 64.93; N, 3.58; Found: C, 18.40; H, 0.74; I, 64.98; N, 3.50.</p>                                                                                                                                                                                          |
|  <p>14a</p> | <p><b>MP</b> = 100-102 °C.</p> <p><b><sup>1</sup>H NMR (400 MHz, in CDCl<sub>3</sub>):</b> δ 8.28 (d, <i>J</i> = 2.5 Hz, 1H), 7.93 (dd, <i>J</i> = 8.6, 2.5 Hz, 1H), 6.75 (d, <i>J</i> = 4.4 Hz, 1H), 4.83 (s, 2H).</p> <p><b><sup>13</sup>C NMR (100 MHz, in CDCl<sub>3</sub>):</b> 153.1, 141.0, 131.3, 122.6, 119.6, 117.9.</p> <p><b>Mass (ESI-MS):</b> 215.95 [M<sup>+</sup>].</p> <p><b>CHN:</b> Expected for C<sub>6</sub>H<sub>5</sub>N<sub>2</sub>O<sub>2</sub>Br; C, 33.21; H, 2.32; N, 12.91; Br, 36.82 Found: C, 33.29; H, 2.34; N, 12.96; Br, 36.93.</p> |
|  <p>14b</p> | <p><b>MP</b> = 91-93 °C.</p> <p><b><sup>1</sup>H NMR (400 MHz, in CDCl<sub>3</sub>):</b> δ 8.37 (d, <i>J</i> = 2.5 Hz, 1H), 8.03 (dd, <i>J</i> = 8.9, 2.5 Hz, 1H), 6.74 (d, <i>J</i> = 4.6 Hz, 1H), 4.83 (s, 2H).</p> <p><b>Mass (ESI-MS):</b> 264.92 [M<sup>+</sup>].</p> <p><b>CHN:</b> Expected for C<sub>6</sub>H<sub>5</sub>IN<sub>2</sub>O<sub>2</sub>; C, 27.19; H, 1.52; I, 47.89; N, 5.29; Found: C, 27.21; H, 1.54; I, 47.91; N, 5.32.</p>                                                                                                                  |
|  <p>14c</p> | <p><b>MP</b> = 203-206 °C.</p> <p><b><sup>1</sup>H NMR (400 MHz, in CDCl<sub>3</sub>):</b> δ 8.34 (s, 2H), 5.29 (s, 2H).</p> <p><b><sup>13</sup>C NMR (100 MHz, in CDCl<sub>3</sub>):</b> 155.7, 142.5, 129.0, 118.0</p> <p><b>Mass (ESI-MS):</b> 293.86 [M<sup>+</sup>].</p> <p><b>CHN:</b> Expected for C<sub>6</sub>H<sub>4</sub>N<sub>2</sub>O<sub>2</sub>Br<sub>2</sub>; C, 24.35; H, 1.362; N, 9.47; Br, 54.00; Found: C, 24.40; H, 1.39; N, 9.90; Br, 54.30.</p>                                                                                               |

|                                                                                                |                                                                                                                                                                                                                                                                                                                                                                                                                                                                                         |
|------------------------------------------------------------------------------------------------|-----------------------------------------------------------------------------------------------------------------------------------------------------------------------------------------------------------------------------------------------------------------------------------------------------------------------------------------------------------------------------------------------------------------------------------------------------------------------------------------|
| 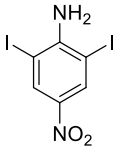 <p>14d</p>   | <p><b>MP</b> = 151-154 °C.</p> <p><b><sup>1</sup>H NMR (400 MHz, in CDCl<sub>3</sub>):</b> δ 8.34 (s, 2H), 5.23 (s, 2H).</p> <p><b>Mass (ESI-MS):</b> 390.82 [M<sup>+</sup>].</p> <p><b>CHN:</b> Expected for C<sub>6</sub>H<sub>3</sub>I<sub>2</sub>N<sub>2</sub>O<sub>2</sub>; C, 18.44; H, 0.77; I, 64.93; N, 3.58; Found: C, 18.42; H, 0.76; I, 64.95; N, 3.61.</p>                                                                                                                 |
|  <p>15a</p>   | <p><b>MP</b> = 210-212 °C.</p> <p><b><sup>1</sup>H NMR (400 MHz, in CDCl<sub>3</sub>):</b> δ 8.18 (d, <i>J</i> = 1.9 Hz, 1H), 7.84 (dd, <i>J</i> = 8.4, 1.9 Hz, 1H), 6.75 (d, <i>J</i> = 8.4 Hz, 1H).</p> <p><b>Mass (ESI-MS):</b> 214.96 [M<sup>+</sup>].</p> <p><b>CHN:</b> Expected for C<sub>7</sub>H<sub>6</sub>NO<sub>2</sub>Br; C, 38.92; H, 2.80; N, 6.48; O, 14.81; Br, 36.99; Found: C, 38.98; H, 2.90; N, 6.50; O, 14.98; Br, 37.00</p>                                      |
|  <p>15b</p>   | <p><b>MP</b> = 160-162 °C.</p> <p><b><sup>1</sup>H NMR (400 MHz, CDCl<sub>3</sub>):</b> δ 8.28 (d, <i>J</i> = 1.9 Hz, 1H), 7.84 (dd, <i>J</i> = 8.4, 1.9 Hz, 1H), 6.65 (d, <i>J</i> = 8.4 Hz, 1H).</p> <p><b>Mass (ESI-MS):</b> 262.94 [M<sup>+</sup>].</p> <p><b>CHN:</b> Expected for C<sub>7</sub>H<sub>6</sub>INO<sub>2</sub>; C, 31.96; H, 2.30; I, 43.25; N, 5.33; Found: C, 31.91; H, 2.32; I, 43.20; N, 5.39.</p>                                                               |
|  <p>15c</p>  | <p><b>MP</b> = 285-286 °C.</p> <p><b><sup>1</sup>H NMR (400 MHz, in CDCl<sub>3</sub>):</b> δ 8.34 (s, 2H), 5.29 (s, 2H);</p> <p><b>Mass (ESI-MS):</b> 292.87 [M<sup>+</sup>].</p> <p><b>CHN:</b> Expected for C<sub>7</sub>H<sub>5</sub>NO<sub>2</sub>Br<sub>2</sub>; C, 28.51; H, 1.71; N, 4.75; Br, 54.19; Found: C, 28.55; H, 1.75; N, 4.72; Br, 54.21.</p>                                                                                                                          |
|  <p>15d</p> | <p><b>MP</b> = 201-203 °C.</p> <p><b><sup>1</sup>H NMR (400 MHz, CDCl<sub>3</sub>):</b> δ 8.34 (s, 2H), 5.29 (s, 2H).</p> <p><b>Mass (ESI-MS):</b> 388.84 [M<sup>+</sup>].</p> <p><b>CHN:</b> Expected for C<sub>7</sub>H<sub>5</sub>I<sub>2</sub>NO<sub>2</sub>; C, 21.62; H, 1.30; I, 65.26; N, 3.60; Found: C, 21.66; H, 1.35; I, 65.22; N, 3.68.</p>                                                                                                                                |
|  <p>16a</p> | <p><b>MP</b> = 66-68 °C.</p> <p><b><sup>1</sup>H NMR (400 MHz, in CDCl<sub>3</sub>):</b> 7.40 (d, <i>J</i> = 2.4 Hz, 1H), 7.07 (dd, <i>J</i> = 8.2 &amp; 2.4 Hz, 1H), 6.68 (d, <i>J</i> = 8.4 Hz, 1H), 4.07 (s, 2H);</p> <p><b>Mass (ESI-MS):</b> 206.4 [M<sup>+</sup>].</p> <p><b>CHN:</b> Expected for C<sub>6</sub>H<sub>5</sub>BrClN; C, 34.90; H, 2.44; Br, 38.70; Cl, 17.17; N, 6.78; Found: C, 34.86; H, 2.54; Br, 38.68; Cl, 17.19; N, 6.75.</p>                                |
|  <p>16b</p> | <p><b>MP</b> = 39-41 °C.</p> <p><b><sup>1</sup>H NMR (400 MHz, CDCl<sub>3</sub>):</b> δ 7.40 (d, <i>J</i> = 2.3 Hz, 1H), 7.07 (dd, <i>J</i> = 8.6, 2.3 Hz, 1H), 6.68 (d, <i>J</i> = 8.6 Hz, 1H), 4.07 (s, 2H).</p> <p><b><sup>13</sup>C NMR (100 MHz, in CDCl<sub>3</sub>):</b> 142.9, 131.8, 128.4, 123.0, 116.2, 85.1.</p> <p><b>Mass (ESI-MS):</b> 252.92 [M<sup>+</sup>].</p> <p><b>CHN:</b> Expected for C<sub>6</sub>H<sub>5</sub>INCl; C, 28.43; H, 1.99; I, 50.07; N, 5.53;</p> |

|                                                                                                |                                                                                                                                                                                                                                                                                                                                                                                                                                                  |
|------------------------------------------------------------------------------------------------|--------------------------------------------------------------------------------------------------------------------------------------------------------------------------------------------------------------------------------------------------------------------------------------------------------------------------------------------------------------------------------------------------------------------------------------------------|
|                                                                                                | Found: C, 28.40; H, 1.90; I, 50.55; N; 5.50; Cl.                                                                                                                                                                                                                                                                                                                                                                                                 |
| 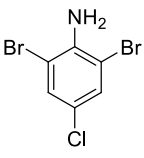 <p>16c</p>   | <p><b>MP</b> = 94-95 °C.</p> <p><b><sup>1</sup>H NMR (400 MHz, in CDCl<sub>3</sub>):</b> 7.39 (s, 2H), 4.54 (s, 2H);</p> <p><b>Mass (ESI-MS):</b> 285.4 [M<sup>+</sup>].</p> <p><b>CHN:</b> Expected for C<sub>6</sub>H<sub>4</sub>Br<sub>2</sub>ClN; C, 25.25; H, 1.41; Br, 56.00; Cl, 12.42; N, 4.91; Found: C, 25.26; H, 1.44; Br, 55.98; Cl, 12.39; N, 4.88.</p>                                                                             |
|  <p>16d</p>   | <p><b>MP</b> = 60-62 °C.</p> <p><b><sup>1</sup>H NMR (400 MHz, CDCl<sub>3</sub>):</b> δ 7.26 (s, 2H), 4.54 (s, 2H).</p> <p><b><sup>13</sup>C NMR (100 MHz, in CDCl<sub>3</sub>):</b> 141.0, 131.3, 122.6, 86.6.</p> <p><b>Mass (ESI-MS):</b> 378.81 [M<sup>+</sup>].</p> <p><b>CHN:</b> Expected for C<sub>6</sub>H<sub>4</sub>I<sub>2</sub>NCl; C, 19.00; H, 1.06; I, 66.90; N; 3.69; Found; C, 19.04; H, 1.10 I, 66.94; N; 3.60; Cl; 9.39.</p> |
|  <p>17a</p>   | <p><b>MP</b> = 32-36 °C.</p> <p><b><sup>1</sup>H NMR (400 MHz, CDCl<sub>3</sub>):</b> δ 7.68 (d, <i>J</i> = 2.1 Hz, 1H), 7.21 (dd, <i>J</i> = 8.2, 2.3 Hz, 1H), 6.65 (d, <i>J</i> = 8.5 Hz, 1H).</p> <p><b>Mass (ESI-MS):</b> 207.45 [M<sup>+</sup>].</p> <p><b>CHN:</b> Expected for C<sub>6</sub>H<sub>4</sub>BrClO; C, 34.74; H, 1.94; Br, 38.52; Cl, 17.09; Found: C, 34.73; H, 1.96; Br, 38.50; Cl, 17.07.</p>                              |
|  <p>17b</p> | <p><b>MP</b> = 75-79 °C.</p> <p><b><sup>1</sup>H NMR (400 MHz, CDCl<sub>3</sub>):</b> δ 7.47 (s, 1H), 7.35(d, <i>J</i> = 8.2 Hz, 1H), 6.82 (d, <i>J</i> = 8.2 Hz, 1H), 5.16 (s, 1H).</p> <p><b>Mass (ESI-MS):</b> 253.90 [M<sup>+</sup>].</p> <p><b>CHN:</b> Expected for C<sub>6</sub>H<sub>4</sub>ClIO; C, 28.32; H, 1.58; I, 49.87; Found: C, 28.30 H, 1.60; I, 49.90.</p>                                                                    |
|  <p>17c</p> | <p><b>MP</b> = 90-92 °C.</p> <p><b><sup>1</sup>H NMR (400 MHz, CDCl<sub>3</sub>):</b> δ 7.61 (s, 2H).</p> <p><b>Mass (ESI-MS):</b> 286.35 [M<sup>+</sup>].</p> <p><b>CHN:</b> Expected for C<sub>6</sub>H<sub>3</sub>Br<sub>2</sub>ClO; C, 25.17; H, 1.06; Br, 55.81; Cl, 12.38; Found: C, 25.18; H, 1.04; Br, 55.83; Cl, 12.35;</p>                                                                                                             |
|  <p>17d</p> | <p><b>MP</b> = 102-104 °C.</p> <p><b><sup>1</sup>H NMR (400 MHz, CDCl<sub>3</sub>):</b> δ 7.66 (s, 2H), 5.71 (s, 1H).</p> <p><b>Mass (ESI-MS):</b> 379.80 [M<sup>+</sup>];</p> <p><b>CHN:</b> Expected for C<sub>6</sub>H<sub>3</sub>ClI<sub>2</sub>O; C, 18.95; H, 0.80; I, 66.7; Found: C, 18.90; H, 0.88; I, 66.74.</p>                                                                                                                       |

|                                                                                                |                                                                                                                                                                                                                                                                                                                                                                                                                                                                                                                                                                    |
|------------------------------------------------------------------------------------------------|--------------------------------------------------------------------------------------------------------------------------------------------------------------------------------------------------------------------------------------------------------------------------------------------------------------------------------------------------------------------------------------------------------------------------------------------------------------------------------------------------------------------------------------------------------------------|
| 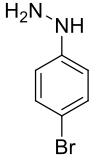 <p>18a</p>   | <p><b>MP</b> = 105-107 °C.</p> <p><b><sup>1</sup>H NMR (400 MHz, in CDCl<sub>3</sub>):</b> δ 7.24 (d, <i>J</i> = 2.0 Hz, 2H), 6.58 (d, <i>J</i> = 3.1 Hz, 2H), 3.66 (s, 2H);</p> <p><b>Mass (ESI-MS):</b> 185.98 [M<sup>+</sup>];</p> <p><b>CHN:</b> Expected for C<sub>6</sub>H<sub>7</sub>N<sub>2</sub>Br; C, 38.53; H, 3.77; N, 14.98; Br, 42.72; Found: C, 38.65; H, 3.70; N, 14.97; Br, 42.79.</p>                                                                                                                                                            |
|  <p>18b</p>   | <p><b>MP</b> = 102-106 °C.</p> <p><b><sup>1</sup>H NMR (400 MHz, CDCl<sub>3</sub>):</b> δ 7.24 – 7.21 (m, 2H), 6.58 – 6.55 (m, 2H), 3.68 (s, 2H). <b><sup>13</sup>C NMR (100 MHz, in CDCl<sub>3</sub>):</b> 156.2, 137.6, 113.4.</p> <p><b>Mass (ESI-MS):</b> 233.97 [M<sup>+</sup>].</p> <p><b>CHN:</b> Expected for C<sub>6</sub>H<sub>7</sub>IN<sub>2</sub>; C, 30.79; H, 3.01; I, 54.22; N, 11.97; Found: C, 30.81; H, 3.05; I, 54.21; N, 11.90.</p>                                                                                                           |
|  <p>18c</p>   | <p><b>MP</b> = 57-60 °C.</p> <p><b><sup>1</sup>H NMR (400 MHz, in CDCl<sub>3</sub>):</b> δ 7.53 (d, <i>J</i> = 2.2 Hz, 1H), 7.20 (dd, <i>J</i> = 8.5, 2.2 Hz, 1H), 6.64 (d, <i>J</i> = 8.5 Hz, 1H), 4.09 (s, 2H);</p> <p><b>Mass (ESI-MS):</b> 263.89 [M<sup>+</sup>].</p> <p><b>CHN:</b> Expected for C<sub>6</sub>H<sub>6</sub>N<sub>2</sub>Br<sub>2</sub>; C, 27.10; H, 2.27; N, 10.53; Br, 60.09; Found: C, 27.19; H, 2.30; N, 10.56; Br, 60.11.</p>                                                                                                           |
|  <p>18d</p> | <p><b>MP</b> = 110-112 °C.</p> <p><b><sup>1</sup>H NMR (400 MHz, CDCl<sub>3</sub>):</b> δ 7.52 (dd, <i>J</i> = 10.8, 2.4 Hz, 1H), 7.20 (dt, <i>J</i> = 8.5, 4.3 Hz, 1H), 6.64 (d, <i>J</i> = 8.5 Hz, 1H), 4.09 (s, 2H).</p> <p><b><sup>13</sup>C NMR (100 MHz, in CDCl<sub>3</sub>):</b> 148.6, 140.1, 137.6, 118.5, 85.6, 81.8.</p> <p><b>Mass (ESI-MS):</b> 359.86 [M<sup>+</sup>].</p> <p><b>CHN:</b> Expected for C<sub>6</sub>H<sub>6</sub>I<sub>2</sub>N<sub>2</sub>; C, 20.02; H, 1.68; I, 70.52; N, 7.78; Found: C, 20.10; H, 1.66; I, 70.55; N, 7.55.</p> |
|  <p>19a</p> | <p><b><sup>1</sup>H NMR (400 MHz, in CDCl<sub>3</sub>):</b> δ 7.43 (d, <i>J</i> = 8.8 Hz, 2H), 6.40 (d, <i>J</i> = 8.7 Hz, 2H), 2.81 (s, 3H);</p> <p><b>Mass (ESI-MS):</b> 184.96 [M<sup>+</sup>].</p> <p><b>CHN:</b> Expected for C<sub>7</sub>H<sub>8</sub>NBr; C, 45.19; H, 4.33; N, 7.53; Br, 42.95; Found: C, 45.15; H, 4.30; N, 7.54; Br, 42.90.</p>                                                                                                                                                                                                         |
|  <p>19b</p> | <p><b>MP</b> = 30-33 °C.</p> <p><b><sup>1</sup>H NMR (400 MHz, CDCl<sub>3</sub>):</b> δ 7.43 (d, <i>J</i> = 8.8 Hz, 2H), 6.40 (d, <i>J</i> = 8.7 Hz, 2H), 2.81 (s, 3H).</p> <p><b><sup>13</sup>C NMR (100 MHz, in CDCl<sub>3</sub>):</b> 148.6, 140.1, 118.5, 77.7, 31.4.</p> <p><b>Mass (ESI-MS):</b> 232.97 [M<sup>+</sup>].</p> <p><b>CHN:</b> Expected for C<sub>7</sub>H<sub>8</sub>IN; C, 36.08; H, 3.46; I, 54.45; N, 6.01; Found: C, 36.10; H, 3.43; I, 54.47; N, 6.10.</p>                                                                                |

|                                                                                                |                                                                                                                                                                                                                                                                                                                                                                                                                                                                                                                                                                   |
|------------------------------------------------------------------------------------------------|-------------------------------------------------------------------------------------------------------------------------------------------------------------------------------------------------------------------------------------------------------------------------------------------------------------------------------------------------------------------------------------------------------------------------------------------------------------------------------------------------------------------------------------------------------------------|
| 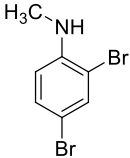 <p>19c</p>   | <p><b>MP</b> = 42-44 °C.</p> <p><b><sup>1</sup>H NMR (400 MHz, in CDCl<sub>3</sub>):</b> δ 7.53 (d, <i>J</i> = 2.3 Hz, 1H), 7.26 (s, 1H), 6.48 (d, <i>J</i> = 8.7 Hz, 1H), 4.36 (s, 1H), 2.87 (s, 3H);</p> <p><b>Mass (ESI-MS):</b> 262.89 [M<sup>+</sup>].</p> <p><b>CHN:</b> Expected for C<sub>7</sub>H<sub>7</sub>NBr<sub>2</sub>; C, 31.73; H, 2.66; N, 5.29; Br. 60.32; Found: C, 31.70; H, 2.65; N, 5.30; Br. 60.34.</p>                                                                                                                                   |
|  <p>19d</p>   | <p><b>MP</b> = 80-82 °C.</p> <p><b><sup>1</sup>H NMR (400 MHz, CDCl<sub>3</sub>):</b> δ 7.75 (d, <i>J</i> = 2.3 Hz, 1H), 7.30 (dd, <i>J</i> = 8.7, 2.3 Hz, 1H), 6.47 (d, <i>J</i> = 8.2 Hz, 1H), 4.36 (s, 1H), 2.87 (s, 3H).</p> <p><b><sup>13</sup>C NMR (100 MHz, in CDCl<sub>3</sub>):</b> 149.2, 145.1, 137.2, 116.3, 84.7, 82.8, 29.7.</p> <p><b>Mass (ESI-MS):</b> 358.87 [M<sup>+</sup>].</p> <p><b>CHN:</b> Expected for C<sub>7</sub>H<sub>7</sub>I<sub>2</sub>N; C, 23.42; H, 1.97; I, 70.71; N, 3.90; Found: C, 23.40; H, 1.94; I, 70.70; N, 3.94.</p> |
|  <p>20a</p>   | <p><b><sup>1</sup>H NMR (400 MHz, CDCl<sub>3</sub>):</b> δ 7.39 (d, <i>J</i> = 8.7 Hz, 2H), 6.51 (d, <i>J</i> = 8.7 Hz, 2H), 3.12 (q, <i>J</i> = 7.1 Hz, 2H), 1.24 (t, <i>J</i> = 7.1 Hz, 3H).</p> <p><b>Mass (ESI-MS):</b> 200.08 [M<sup>+</sup>].</p> <p><b>CHN:</b> Expected for C<sub>8</sub>H<sub>10</sub>BrN; C, 48.02; H, 5.04; N, 7.00; Br. 39.94; Found: C, 48.39; H, 5.06; N, 7.02; Br. 39.96.</p>                                                                                                                                                      |
|  <p>20b</p> | <p><b>MP</b> = 50-52 °C.</p> <p><b><sup>1</sup>H NMR (400 MHz, CDCl<sub>3</sub>):</b> δ 7.41 (d, <i>J</i> = 8.7 Hz, 2H), 6.40 (d, <i>J</i> = 8.7 Hz, 2H), 3.12 (q, <i>J</i> = 7.1 Hz, 2H), 1.24 (t, <i>J</i> = 7.1 Hz, 3H).</p> <p><b><sup>13</sup>C NMR (100 MHz, in CDCl<sub>3</sub>):</b> 143.3, 134.5, 116.7, 45.9, 29.7.</p> <p><b>Mass (ESI-MS):</b> 246.99 [M<sup>+</sup>].</p> <p><b>CHN:</b> Expected for C<sub>8</sub>H<sub>10</sub>IN; C, 38.89; H, 4.08; I, 51.36; N, 5.97; Found: C, 38.92; H, 4.10; I, 51.30; N, 5.95.</p>                          |
|  <p>20c</p> | <p><b><sup>1</sup>H NMR (400 MHz, CDCl<sub>3</sub>):</b> δ 7.78 (d, <i>J</i> = 2.1 Hz, 1H), 7.20 (dd, <i>J</i> = 8.2, 2.3 Hz, 1H), 6.38 (d, <i>J</i> = 8.7 Hz, 1H), 3.12 (q, <i>J</i> = 7.1 Hz, 2H), 1.24 (t, <i>J</i> = 7.1 Hz, 3H).</p> <p><b>Mass (ESI-MS):</b> 278.97 [M<sup>+</sup>].</p> <p><b>CHN:</b> Expected for C<sub>8</sub>H<sub>9</sub>Br<sub>2</sub>N; C, 34.44; H, 3.25; N, 7.00; Br. 57.28; Found: C, 34.45; H, 3.22; N, 6.96; Br. 57.31.</p>                                                                                                    |
|  <p>20d</p> | <p><b>MP</b> = 65-67 °C.</p> <p><b><sup>1</sup>H NMR (400 MHz, CDCl<sub>3</sub>):</b> δ 7.53 (d, <i>J</i> = 2.3 Hz, 1H), 7.29 (dd, <i>J</i> = 8.7, 2.3 Hz, 1H), 6.48 (d, <i>J</i> = 8.7 Hz, 1H), 3.12 (q, <i>J</i> = 7.1 Hz, 2H), 1.24 (t, <i>J</i> = 7.1 Hz, 3H).</p> <p><b>Mass (ESI-MS):</b> 372.88 [M<sup>+</sup>].</p> <p><b>CHN:</b> Expected for C<sub>8</sub>H<sub>9</sub>I<sub>2</sub>N; C, 25.76; H, 2.43; I, 68.05; N, 3.76; Found: C, 25.79; H, 2.40; I, 68.10; N, 3.79.</p>                                                                          |

|                                                                                                |                                                                                                                                                                                                                                                                                                                                                                                                                                                                                                                                                                                          |
|------------------------------------------------------------------------------------------------|------------------------------------------------------------------------------------------------------------------------------------------------------------------------------------------------------------------------------------------------------------------------------------------------------------------------------------------------------------------------------------------------------------------------------------------------------------------------------------------------------------------------------------------------------------------------------------------|
| 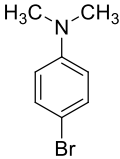 <p>21a</p>   | <p><b>MP</b> = 52-54 °C.</p> <p><b><sup>1</sup>H NMR (400 MHz, in CDCl<sub>3</sub>):</b> δ 7.43 (d, <i>J</i> = 2.1 Hz, 2H), 6.65 (d, <i>J</i> = 9.0 Hz, 2H), 2.92 (s, 6H);</p> <p><b>Mass (ESI-MS):</b> 199.00 [M<sup>+</sup>].</p> <p><b>CHN:</b> Expected for CHN: Expected for C<sub>8</sub>H<sub>10</sub>NBr; C, 48.02; H, 5.04; N, 7.00; Br, 39.94; Found: C, 48.05; H, 5.06; N, 7.10; Br, 39.99.</p>                                                                                                                                                                               |
|  <p>21b</p>   | <p><b>MP</b> = 63-65 °C.</p> <p><b><sup>1</sup>H NMR (400 MHz, in CDCl<sub>3</sub>):</b> δ 7.47 (d, <i>J</i> = 2.1 Hz, 2H), 6.49 (d, <i>J</i> = 9.0 Hz, 2H), 2.92 (s, 6H).</p> <p><b><sup>13</sup>C NMR (100 MHz, in CDCl<sub>3</sub>):</b> 150.0, 137.5, 114.7, 77.4, 40.3.</p> <p><b>Mass (ESI-MS):</b> 246.99 [M<sup>+</sup>].</p> <p><b>CHN:</b> Expected for C<sub>8</sub>H<sub>10</sub>IN; C, 38.89; H, 4.08; I, 51.36; N, 5.67; Found: C, 38.80; H, 4.08; I, 51.39; N, 5.60.</p>                                                                                                  |
|  <p>21c</p>  | <p><b>MP</b> = 52-54 °C.</p> <p><b><sup>1</sup>H NMR (400 MHz, in CDCl<sub>3</sub>):</b> δ 7.31 – 7.28 (m, 1H), 6.93 (d, <i>J</i> = 8.6 Hz, 1H), 6.60 – 6.56 (m, 1H), 2.92 (s, 6H).</p> <p><b>Mass (ESI-MS):</b> 199.00 [M<sup>+</sup>].</p> <p><b>CHN:</b> Expected for C<sub>8</sub>H<sub>9</sub>NBr<sub>2</sub>; C, 48.02; H, 5.04; N, 7.00; Br, 39.94; Found: C, 48.05; H, 5.06; N, 7.10; Br, 39.99.</p>                                                                                                                                                                             |
|  <p>21d</p> | <p><b>MP</b> = 70-72 °C.</p> <p><b><sup>1</sup>H NMR (400 MHz, in CDCl<sub>3</sub>):</b> 7.53 (d, <i>J</i> = 2.2 Hz, 1H), 7.29 (dd, <i>J</i> = 5.2, 2.6 Hz, 1H), 6.48 (d, <i>J</i> = 8.7 Hz, 1H), 2.87 (s, 6H).</p> <p><b>Mass (ESI-MS):</b> 372.88 [M<sup>+</sup>].</p> <p><b>CHN:</b> Expected for C<sub>8</sub>H<sub>9</sub>I<sub>2</sub>N; C, 25.76; H, 2.43; I, 68.05; N, 3.76; Found; C, 25.74; H, 2.40; I, 68.15; N, 3.70.</p>                                                                                                                                                    |
|  <p>25a</p> | <p><b>MP</b> = 79-80 °C.</p> <p><b><sup>1</sup>H NMR (400 MHz, in CDCl<sub>3</sub>):</b> δ 7.92 (dd, <i>J</i> = 14.7, 5.3 Hz, 2H), 7.69 – 7.57 (m, 3H), 7.28 (d, <i>J</i> = 5.7 Hz, 1H), 5.93 (s, 1H).</p> <p><b>Mass (ESI-MS):</b> 223.1 [M<sup>+</sup>].</p> <p><b>CHN:</b> Expected for C<sub>10</sub>H<sub>7</sub>BrO; C, 53.84; H, 3.16; Br, 35.82; Found: C, 53.87; H, 3.14; Br, 35.78.</p>                                                                                                                                                                                        |
|  <p>25b</p> | <p><b>MP</b> = 108-110 °C.</p> <p><b><sup>1</sup>H NMR (400 MHz, CDCl<sub>3</sub>):</b> δ 7.93 (d, <i>J</i> = 8.5 Hz, 1H), 7.76 – 7.72 (m, 2H), 7.55 (t, <i>J</i> = 7.7 Hz, 1H), 7.38 (t, <i>J</i> = 7.5 Hz, 1H), 7.26 (d, <i>J</i> = 1.5 Hz, 1H), 5.79 (s, 1H).</p> <p><b><sup>13</sup>C NMR (100 MHz, in CDCl<sub>3</sub>):</b> 153.7, 134.7, 131.6, 130.2, 129.66, 128.2, 124.1 116.4, 86.2.</p> <p><b>Mass (ESI-MS):</b> 269.95 [M<sup>+</sup>].</p> <p><b>CHN:</b> Expected for C<sub>10</sub>H<sub>7</sub>IO; C, 44.47; H, 2.61; I, 46.99; Found; C, 44.44; H, 2.69; I, 46.90.</p> |

|                                                                                            |                                                                                                                                                                                                                                                                                                                                                                                                                                                                                                                                                                                                                |
|--------------------------------------------------------------------------------------------|----------------------------------------------------------------------------------------------------------------------------------------------------------------------------------------------------------------------------------------------------------------------------------------------------------------------------------------------------------------------------------------------------------------------------------------------------------------------------------------------------------------------------------------------------------------------------------------------------------------|
| 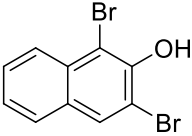<br>25c   | <p><b>MP</b> = 105-106 °C.<br/> <b><sup>1</sup>H NMR (400 MHz, in CDCl<sub>3</sub>)</b>: 8.16 (d, <i>J</i> = 1.6 Hz, 1H), 7.81-7.79 (m, 2H), 7.65-7.61 (m, 2H), 5.93 (s, 1H);<br/> <b>Mass (ESI-MS)</b>: 301.9 [M<sup>+</sup>].<br/> <b>CHN</b>: Expected for C<sub>10</sub>H<sub>6</sub>Br<sub>2</sub>O; C, 39.78; H, 2.00; Br, 52.92; Found: C, 39.81; H, 2.04; Br, 52.89.</p>                                                                                                                                                                                                                               |
| <br>25d   | <p><b>MP</b> = 120-123 °C.<br/> <b><sup>1</sup>H NMR (400 MHz, CDCl<sub>3</sub>)</b>: δ 7.92 (dd, <i>J</i> = 14.7, 5.3 Hz, 2H), 7.69-7.62 (m, 2H), 7.29 (s, 1H), 5.93 (s, 1H).<br/> <b><sup>13</sup>C NMR (100 MHz, in CDCl<sub>3</sub>)</b>: 150.6, 132.3, 129.7, 129.4, 127.9, 125.4, 124.2, 85.2, 82.3.<br/> <b>Mass (ESI-MS)</b>: 395.85 [M<sup>+</sup>].<br/> <b>CHN</b>: Expected for C<sub>10</sub>H<sub>6</sub>I<sub>2</sub>O; C, 30.33; H, 1.53; I, 64.10; Found: C, 30.37; H, 1.55; I, 64.08.</p>                                                                                                    |
| <br>26a   | <p><b>MP</b> = 43-45 °C.<br/> <b><sup>1</sup>H NMR (400 MHz, in CDCl<sub>3</sub>)</b>: δ 8.03 (d, <i>J</i> = 8.5 Hz, 1H), 7.79 – 7.73 (m, 2H), 7.57 (t, <i>J</i> = 7.7 Hz, 1H), 7.39 (t, <i>J</i> = 7.5 Hz, 1H), 7.27 (d, <i>J</i> = 7.5 Hz, 1H), 5.92 (s, 1H).<br/> <b><sup>13</sup>C NMR (100 MHz, in CDCl<sub>3</sub>)</b>: 150.6, 134.1, 132.3, 128.3, 127.9, 126.8, 124.2, 122.6, 121.3, 106.2.<br/> <b>Mass (ESI-MS)</b>: 221.97 [M<sup>+</sup>].<br/> <b>CHN</b>: Expected for C<sub>10</sub>H<sub>7</sub>OBr; C, 53.84; H, 3.16; O, 7.17; Br, 35.82; Found: C, 53.88; H, 3.11; O, 7.19; Br, 35.80.</p> |
| <br>26b | <p><b>MP</b> = 92-96 °C.<br/> <b><sup>1</sup>H NMR (400 MHz, CDCl<sub>3</sub>)</b>: δ 8.23 (d, <i>J</i> = 8.5 Hz, 1H), 8.06 (dd, <i>J</i> = 15.8, 8.5 Hz, 2H), 7.57 (t, <i>J</i> = 7.7 Hz, 1H), 7.39 (t, <i>J</i> = 7.5 Hz, 1H), 7.27 (d, <i>J</i> = 4.8 Hz, 1H), 5.91 (s, 1H).<br/> <b>Mass (ESI-MS)</b>: 269.95 [M<sup>+</sup>].<br/> <b>CHN</b>: Expected for C<sub>10</sub>H<sub>7</sub>IO; C, 44.47; H, 2.61; I, 46.99; Found: C, 44.44; H, 2.69; I, 46.90.</p>                                                                                                                                           |
| <br>26c | <p><b>MP</b> = 105-107 °C.<br/> <b><sup>1</sup>H NMR (400 MHz, in CDCl<sub>3</sub>)</b>: δ 8.25 (d, <i>J</i> = 8.4 Hz, 1H), 8.13 (d, <i>J</i> = 8.4 Hz, 1H), 7.80 (s, 1H), 7.61-7.56 (m, 2H), 5.97 (s, 1H).<br/> <b><sup>13</sup>C NMR (100 MHz, in CDCl<sub>3</sub>)</b>: 150.6, 132.3, 129.7, 129.4, 127.9, 125.4, 124.2, 119.9, 114.2, 106.2.<br/> <b>Mass (ESI-MS)</b>: 299.88 [M<sup>+</sup>]; 301.88 (M+2) 303.88 (M+4);<br/> <b>CHN</b>: Expected for C<sub>10</sub>H<sub>6</sub>OBr<sub>2</sub>; C, 39.78; H, 2.00; O, 5.30; Br, 52.9; Found: C, 39.80; H, 2.10; O, 5.35; Br, 52.99.</p>               |
| <br>26d | <p><b>MP</b> = 110-112 °C.<br/> <b><sup>1</sup>H NMR (400 MHz, CDCl<sub>3</sub>)</b>: δ 8.25 (d, <i>J</i> = 8.4 Hz, 1H), 8.13 (d, <i>J</i> = 8.4 Hz, 1H), 7.80 (s, 1H), 7.59 (dd, <i>J</i> = 14.3, 3.6 Hz, 2H), 5.97 (s, 1H).<br/> <b><sup>13</sup>C NMR (100 MHz, in CDCl<sub>3</sub>)</b>: 163.7, 148.3, 136.9, 132.3, 129.7, 129.4, 128.3, 123.4, 92.8, 76.7.<br/> <b>Mass (ESI-MS)</b>: 395.85 [M<sup>+</sup>].<br/> <b>CHN</b>: Expected for C<sub>10</sub>H<sub>6</sub>I<sub>2</sub>O; C, 30.33; H, 1.53; I, 64.10; Found: C,</p>                                                                        |

|                                                                                                |                                                                                                                                                                                                                                                                                                                                                                                                                                                                                                                                                                                                                                   |
|------------------------------------------------------------------------------------------------|-----------------------------------------------------------------------------------------------------------------------------------------------------------------------------------------------------------------------------------------------------------------------------------------------------------------------------------------------------------------------------------------------------------------------------------------------------------------------------------------------------------------------------------------------------------------------------------------------------------------------------------|
|                                                                                                | 30.37; H, 1.55; I, 64.08.                                                                                                                                                                                                                                                                                                                                                                                                                                                                                                                                                                                                         |
| 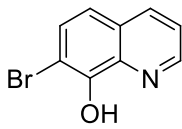 <p>27a</p>   | <p><b>MP</b> = 140-142 °C.</p> <p><b><sup>1</sup>H NMR (400 MHz, in CDCl<sub>3</sub>):</b> δ 8.77 (dd, <i>J</i> = 4.3, 1.5 Hz, 1H), 8.15 (dd, <i>J</i> = 8.3, 1.5 Hz, 1H), 7.79 (d, <i>J</i> = 4.4 Hz, 1H), 7.48 (dd, <i>J</i> = 8.3, 4.3 Hz, 1H), 7.14 (d, <i>J</i> = 8.8 Hz, 1H).</p> <p><b><sup>13</sup>C NMR (100 MHz, in CDCl<sub>3</sub>):</b> 152.5, 150.6, 140.2, 132.3, 129.4, 125.4, 124.2, 121.7, 106.2.</p> <p><b>Mass (ESI-MS):</b> 222.96 [M<sup>+</sup>].</p> <p><b>CHN:</b> Expected for C<sub>9</sub>H<sub>6</sub>NBrO; C, 48.25; H, 2.70; N, 6.25; Br. 35.66; Found: C, 48.30; H, 2.69; N, 6.24; Br. 35.62.</p> |
|  <p>27b</p>   | <p><b>MP</b> = 150-153 °C.</p> <p><b><sup>1</sup>H NMR (400 MHz, CDCl<sub>3</sub>):</b> δ 8.77 (dd, <i>J</i> = 4.3, 1.5 Hz, 1H), 8.15 (dd, <i>J</i> = 8.3, 1.5 Hz, 1H), 7.82 (m, 1H), 7.48 (dd, <i>J</i> = 8.3, 4.3 Hz, 1H), 7.14 (d, <i>J</i> = 8.8 Hz, 1H).</p> <p><b><sup>13</sup>C NMR (100 MHz, in CDCl<sub>3</sub>):</b> 153.0, 148.6, 137.5, 136.2, 135.2, 128.1, 122.3, 119.3, 77.5.</p> <p><b>Mass (ESI-MS):</b> 270.95 [M<sup>+</sup>].</p> <p><b>CHN:</b> Expected for C<sub>9</sub>H<sub>6</sub>ION; C, 39.88; H, 2.23; I, 46.82; N, 5.17; Found: C, 39.80; H, 2.25; I, 46.79; N, 5.11.</p>                           |
|  <p>27c</p> | <p><b>MP</b> = 197-199 °C.</p> <p><b><sup>1</sup>H NMR (400 MHz, in CDCl<sub>3</sub>):</b> 8.82 (dd, <i>J</i> = 4.0, 1.2 Hz, 1H), 8.47 (dd, <i>J</i> = 8.2, 1.2 Hz, 1H), 7.91 (s, 1H), 7.59 (dd, <i>J</i> = 8.2, 4.0 Hz, 1H).</p> <p><b><sup>13</sup>C NMR (100 MHz, in CDCl<sub>3</sub>):</b> 153.1, 150.6, 135.0, 132.3, 129.7, 129.4, 124.2, 121.0, 120.4.</p> <p><b>Mass (ESI-MS):</b> 302.9 [M<sup>+</sup>].</p> <p><b>CHN:</b> Expected for C<sub>9</sub>H<sub>5</sub>Br<sub>2</sub>NO; C, 35.68; H, 1.66; Br, 52.75; N, 4.62; O, 5.28; Found: C, 35.71; H, 1.65; Br, 52.78; N, 4.60; O, 5.25.</p>                          |
|  <p>27d</p> | <p><b>MP</b> = 202-205 °C.</p> <p><b><sup>1</sup>H NMR (400 MHz, CDCl<sub>3</sub>):</b> δ 8.74 (d, <i>J</i> = 4.2 Hz, 1H), 8.32 (s, 1H), 8.29 (d, <i>J</i> = 1.2 Hz, 1H), 7.56 (dd, <i>J</i> = 8.5, 4.2 Hz, 1H).</p> <p><b><sup>13</sup>C NMR (100 MHz, in CDCl<sub>3</sub>):</b> 153.0, 147.8, 146.1, 137.5, 136.2, 128.2, 85.7, 80.7.</p> <p><b>Mass (ESI-MS):</b> 396.8 [M<sup>+</sup>].</p> <p><b>CHN:</b> Expected for C<sub>9</sub>H<sub>5</sub>I<sub>2</sub>ON; C, 27.23; H, 1.27; I, 63.94; N, 3.53; Found: C, 27.24; H, 1.20; I, 63.89; N, 3.59.</p>                                                                     |
|  <p>28a</p> | <p><b>MP</b> = 215-217 °C.</p> <p><b><sup>1</sup>H NMR (400 MHz, in CDCl<sub>3</sub>):</b> δ 7.51 (d, <i>J</i> = 8.7 Hz, 1H), 7.00 (d, <i>J</i> = 5.1 Hz, 1H), 6.16 (s, 1H), 5.95 (s, 1H), 2.42 (s, 3H).</p> <p><b><sup>13</sup>C NMR (100 MHz, in CDCl<sub>3</sub>):</b> 162.3, 157.0, 152.9, 148.8, 130.8, 114.2, 112.8, 107.8, 21.4.</p> <p><b>Mass (ESI-MS):</b> 254.99 [M<sup>+</sup>].</p> <p><b>CHN:</b> Expected for C<sub>10</sub>H<sub>7</sub>O<sub>3</sub>Br; C, 46.90; H, 3.94; N, 5.47; Br, 31.20; Found: C, 46.96; H, 3.90; N, 5.49; Br, 31.25.</p>                                                                 |



|                                                                                                |                                                                                                                                                                                                                                                                                                                                                                                                                                                                                                                                                                   |
|------------------------------------------------------------------------------------------------|-------------------------------------------------------------------------------------------------------------------------------------------------------------------------------------------------------------------------------------------------------------------------------------------------------------------------------------------------------------------------------------------------------------------------------------------------------------------------------------------------------------------------------------------------------------------|
| 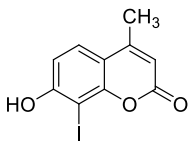 <p>28b</p>   | <p><b>MP</b> = 234-236 °C.</p> <p><b><sup>1</sup>H NMR (400 MHz, CDCl<sub>3</sub>):</b> δ 7.51 (d, <i>J</i> = 8.7 Hz, 1H), 7.00 (d, <i>J</i> = 8.7 Hz, 1H), 6.15 (d, <i>J</i> = 9.0 Hz, 1H), 5.94 (s, 1H), 2.42 (s, 3H).</p> <p><b><sup>13</sup>C NMR (100 MHz, in CDCl<sub>3</sub>):</b> 162.1, 161.0, 155.2, 151.7, 133.9, 113.5, 110.3, 108.1, 82.1, 18.7.</p> <p><b>Mass (ESI-MS):</b> 301.94 [M<sup>+</sup>].</p> <p><b>CHN:</b> Expected for C<sub>10</sub>H<sub>7</sub>IO<sub>3</sub>; C, 39.76; H, 2.34; I, 42.01; Found C, 39.79; H, 2.30; I, 42.41.</p> |
|  <p>28c</p>   | <p><b>MP</b> = 279-280 °C.</p> <p><b><sup>1</sup>H NMR (400 MHz, in CDCl<sub>3</sub>):</b> 7.94 (s, 1H), 6.16 (s, 1H), 2.41 (s, 3H).</p> <p><b><sup>13</sup>C NMR (100 MHz, in CDCl<sub>3</sub>):</b> 162.6, 152.2, 150.0, 148.5, 130.9, 129.4, 114.2, 122.8, 107.8, 19.2.</p> <p><b>Mass (ESI-MS):</b> 333.9 [M<sup>+</sup>].</p> <p><b>CHN:</b> Expected for C<sub>10</sub>H<sub>6</sub>Br<sub>2</sub>O<sub>3</sub>; C, 35.97; H, 1.81; Br, 47.85; Found: C, 35.99; H, 1.84; Br, 47.82.</p>                                                                     |
|  <p>28d</p>  | <p><b>MP</b> = 252-254 °C.</p> <p><b><sup>1</sup>H NMR (400 MHz, CDCl<sub>3</sub>):</b> δ 7.94 (s, 1H), 6.16 (s, 1H), 2.41 (s, 3H)</p> <p><b><sup>13</sup>C NMR (100 MHz, in CDCl<sub>3</sub>):</b> 162.2, 161.1, 151.7, 148.2, 133.9, 116.3, 113.5, 85.2, 82.8, 18.7.</p> <p><b>Mass (ESI-MS):</b> 427.84 [M<sup>+</sup>].</p> <p><b>CHN:</b> Expected for C<sub>10</sub>H<sub>6</sub>I<sub>2</sub>O<sub>3</sub>; C, 28.06; H, 1.41; I, 59.31; Found: C, 28.23; H, 1.38; I, 59.45.</p>                                                                           |
|  <p>29a</p> | <p><b><sup>1</sup>H NMR (400 MHz, CDCl<sub>3</sub>):</b> 7.79 (d, <i>J</i> = 8.4 Hz, 1H), 7.51 (d, <i>J</i> = 8.7 Hz, 1H), 6.85 (d, <i>J</i> = 3.7 Hz, 1H), 6.13 (d, <i>J</i> = 1.1 Hz, 1H).</p> <p><b>Mass (ESI-MS):</b> 241.04 [M<sup>+</sup>].</p> <p><b>CHN:</b> Expected for C<sub>9</sub>H<sub>5</sub>BrO<sub>3</sub>; C, 44.85; H, 2.09; Br, 33.15; Found: C, 44.82; H, 2.11; Br, 33.17.</p>                                                                                                                                                               |
|  <p>29b</p> | <p><b>MP</b> = 140-142 °C.</p> <p><b><sup>1</sup>H NMR (400 MHz, CDCl<sub>3</sub>):</b> 7.68 (d, <i>J</i> = 8.41 Hz, 1H), 7.51 (d, <i>J</i> = 8.7 Hz, 1H), 6.99 (d, <i>J</i> = 3.7 Hz, 1H), 6.16 (d, <i>J</i> = 1.1 Hz, 1H).</p> <p><b>Mass (ESI-MS):</b> 287.93 [M<sup>+</sup>].</p> <p><b>CHN:</b> Expected for C<sub>9</sub>H<sub>5</sub>IO<sub>3</sub>; C, 37.53; H, 1.75; I, 44.06; Found: C, 37.50; H, 1.74; I, 44.10.</p>                                                                                                                                  |
|  <p>29c</p> | <p><b><sup>1</sup>H NMR (400 MHz, CDCl<sub>3</sub>):</b> 7.96 (s, 1H), 7.78 (d, <i>J</i> = 8.7 Hz, 1H), 6.25 (d, <i>J</i> = 1.1 Hz, 1H).</p> <p><b>Mass (ESI-MS):</b> 319.93 [M<sup>+</sup>].</p> <p><b>CHN:</b> Expected for C<sub>9</sub>H<sub>4</sub>Br<sub>2</sub>O<sub>3</sub>; C, 33.79; H, 1.26; Br, 49.95; Found: C, 33.81; H, 1.28; Br, 49.93.</p>                                                                                                                                                                                                       |

|                                                                                          |                                                                                                                                                                                                                                                                                                                                                                                            |
|------------------------------------------------------------------------------------------|--------------------------------------------------------------------------------------------------------------------------------------------------------------------------------------------------------------------------------------------------------------------------------------------------------------------------------------------------------------------------------------------|
| 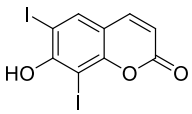<br>29d | <p><b>MP</b> = 165-167 °C.</p> <p><b><sup>1</sup>H NMR (400 MHz, CDCl<sub>3</sub>):</b> δ 7.85 (s, 2H), 7.53 (d, <i>J</i> = 9.5 Hz, 2H), 6.29 (d, <i>J</i> = 5.0 Hz, 1H).</p> <p><b>Mass (ESI-MS):</b> 413.82 [M<sup>+</sup>].</p> <p><b>CHN:</b> Expected) for C<sub>9</sub>H<sub>4</sub>I<sub>2</sub>O<sub>3</sub>; C, 26.11; H, 0.97; I, 61.32; Found: C, 26.15; H, 0.95; I, 61.30.</p> |
|------------------------------------------------------------------------------------------|--------------------------------------------------------------------------------------------------------------------------------------------------------------------------------------------------------------------------------------------------------------------------------------------------------------------------------------------------------------------------------------------|

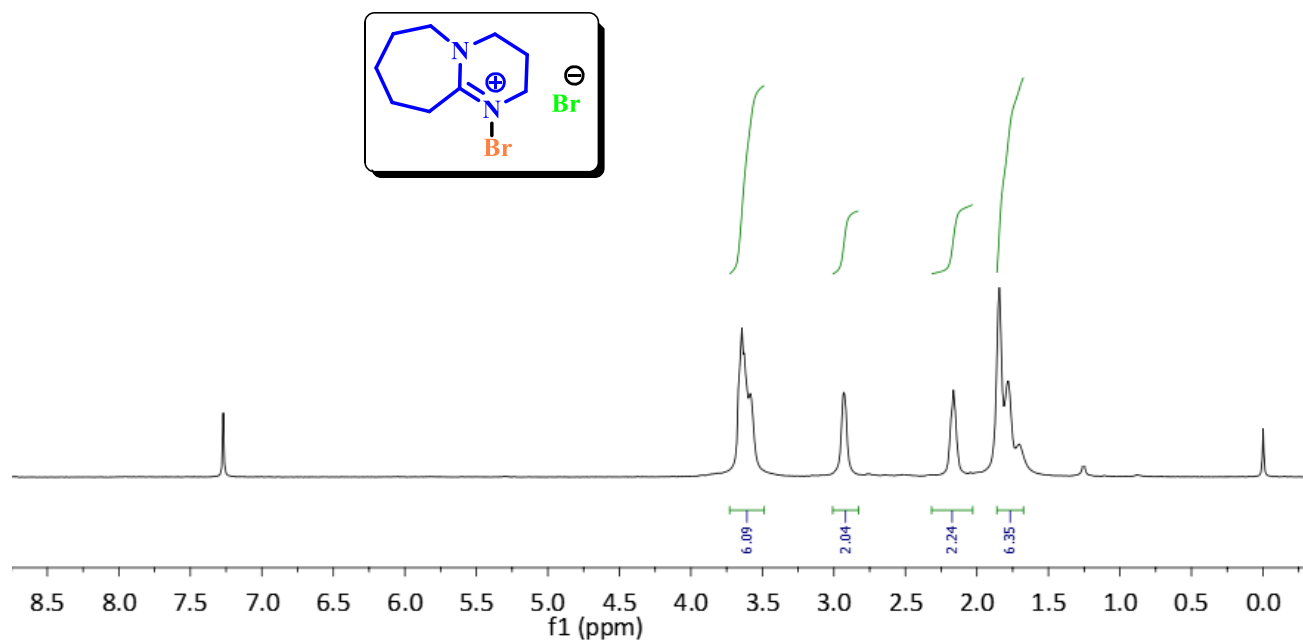

$^1\text{H-NMR}$  of **2** in  $\text{CDCl}_3$

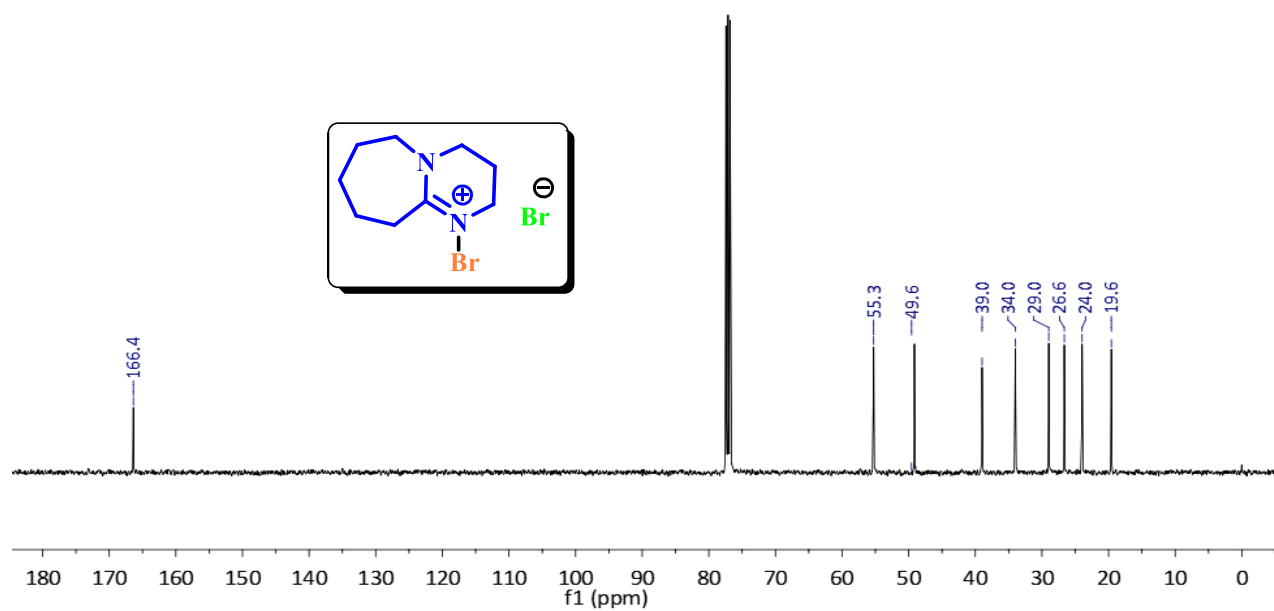

$^{13}\text{C-NMR}$  of **2** in  $\text{CDCl}_3$

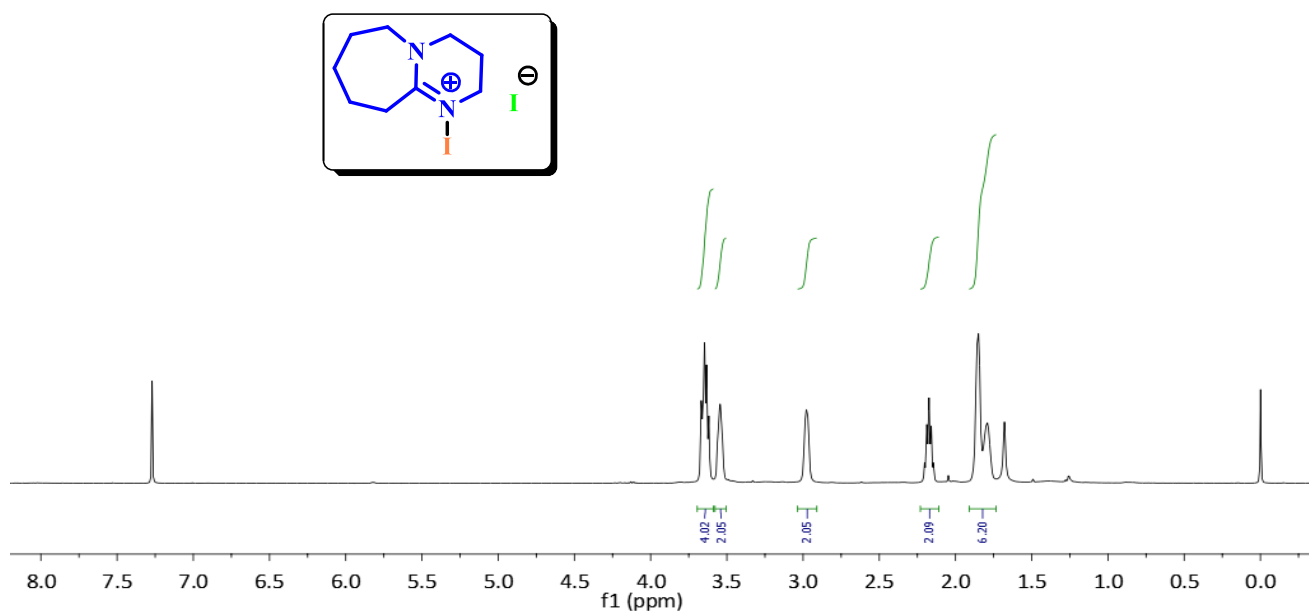

<sup>1</sup>H-NMR of **3** in CDCl<sub>3</sub>

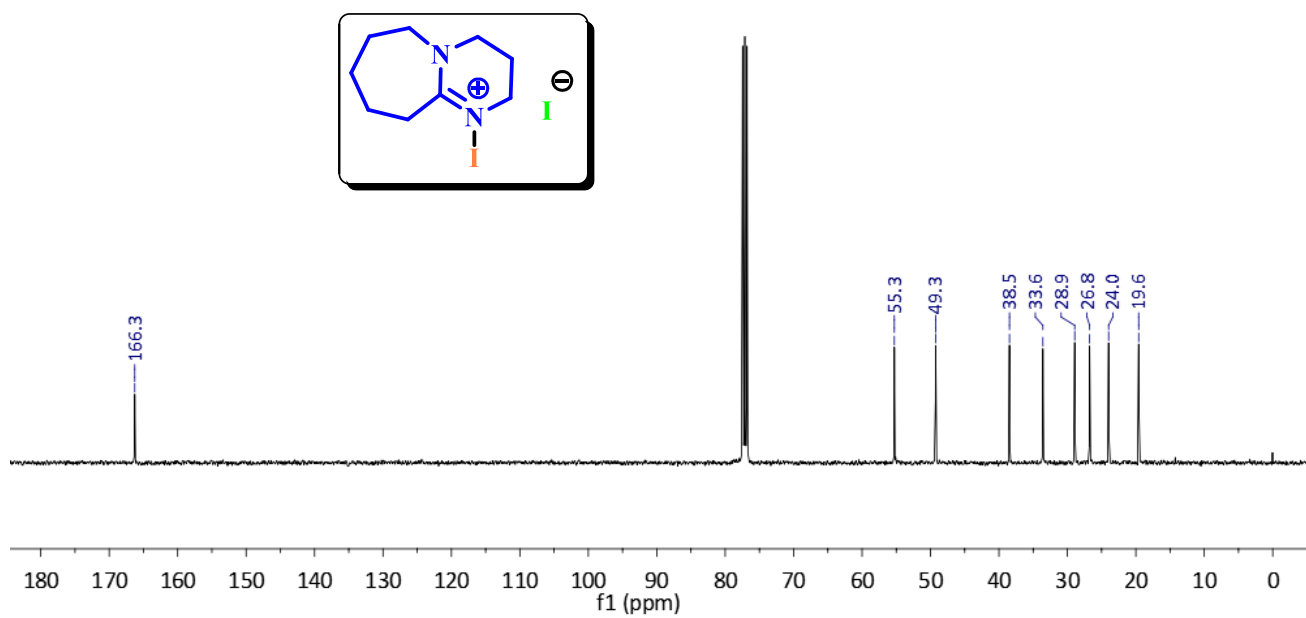

<sup>13</sup>C-NMR of **3** in CDCl<sub>3</sub>

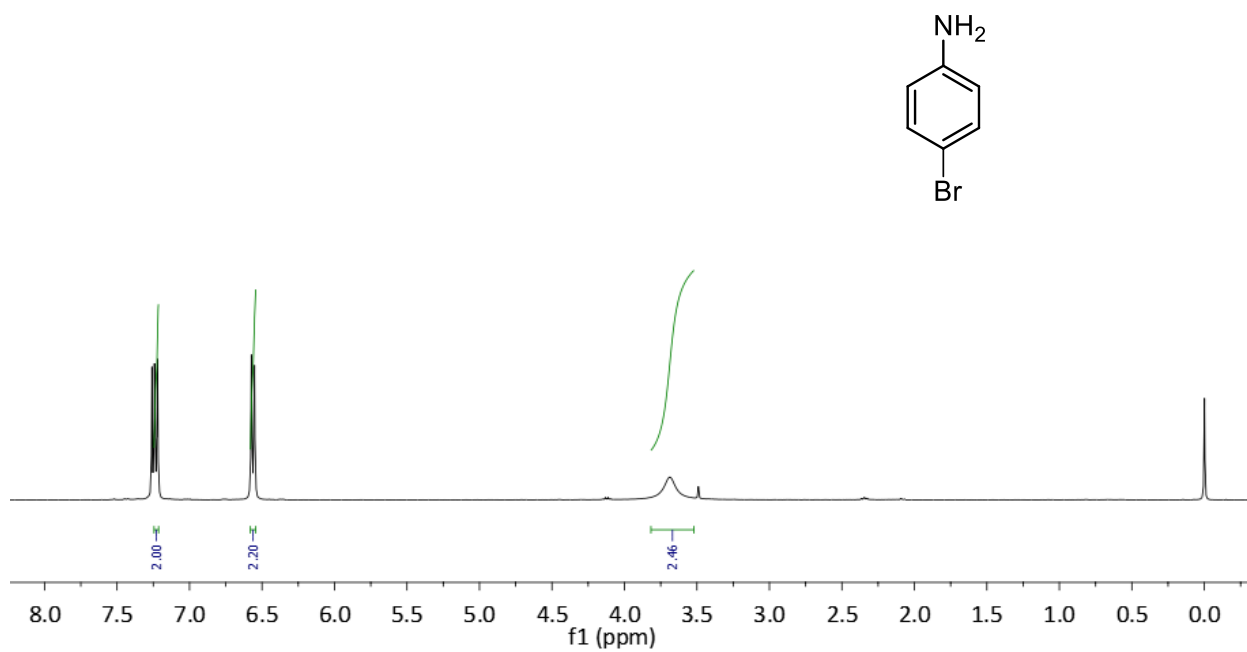

<sup>1</sup>H-NMR of 4a in CDCl<sub>3</sub>

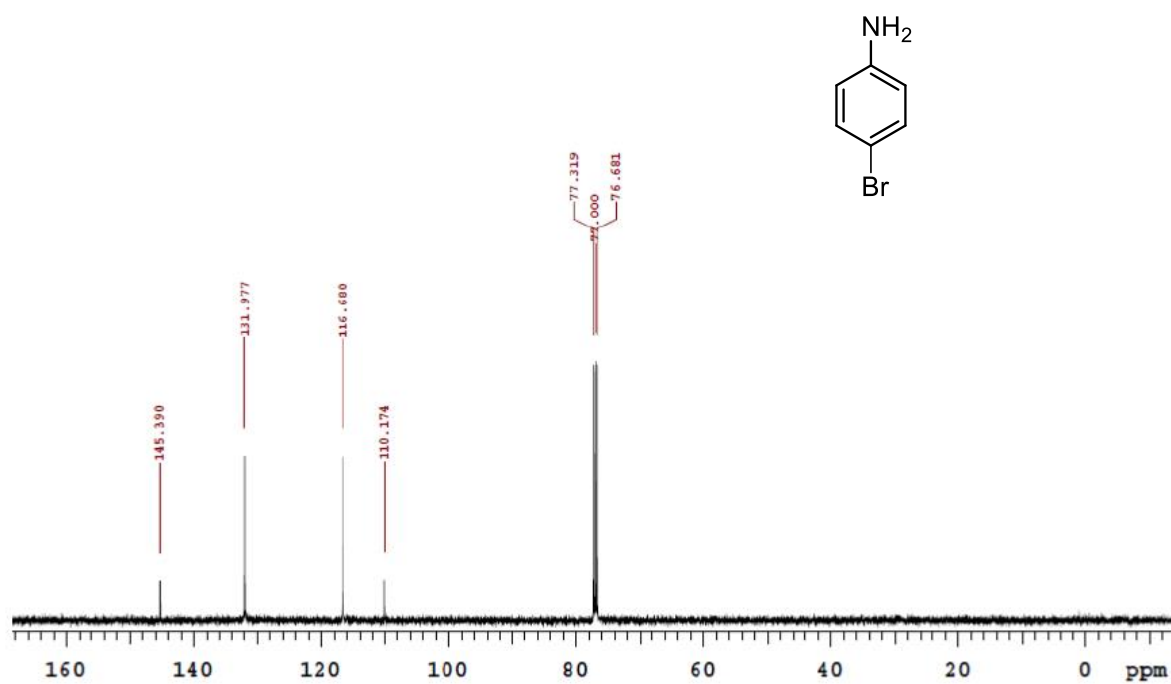

<sup>13</sup>C-NMR of 4a in CDCl<sub>3</sub>

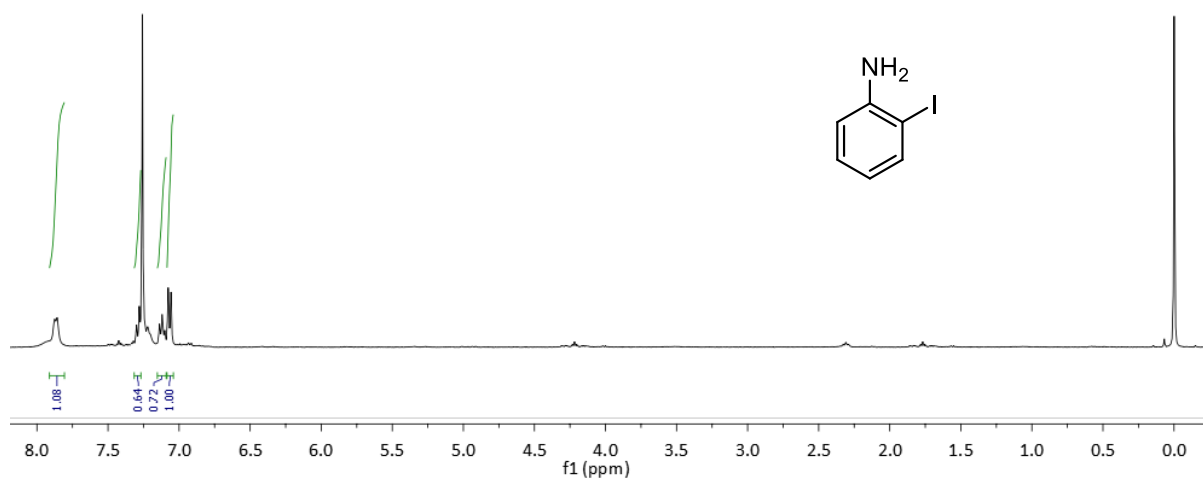

$^1\text{H-NMR}$  of 4b in  $\text{CDCl}_3$

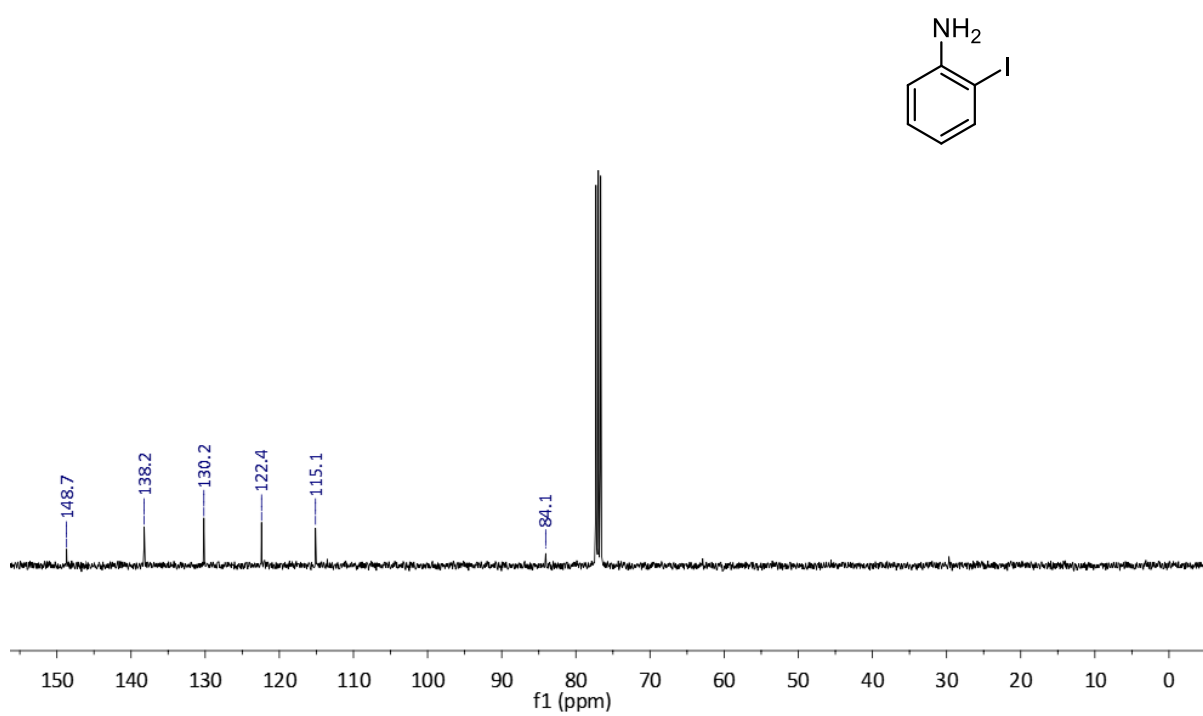

$^{13}\text{C-NMR}$  of 4b in  $\text{CDCl}_3$

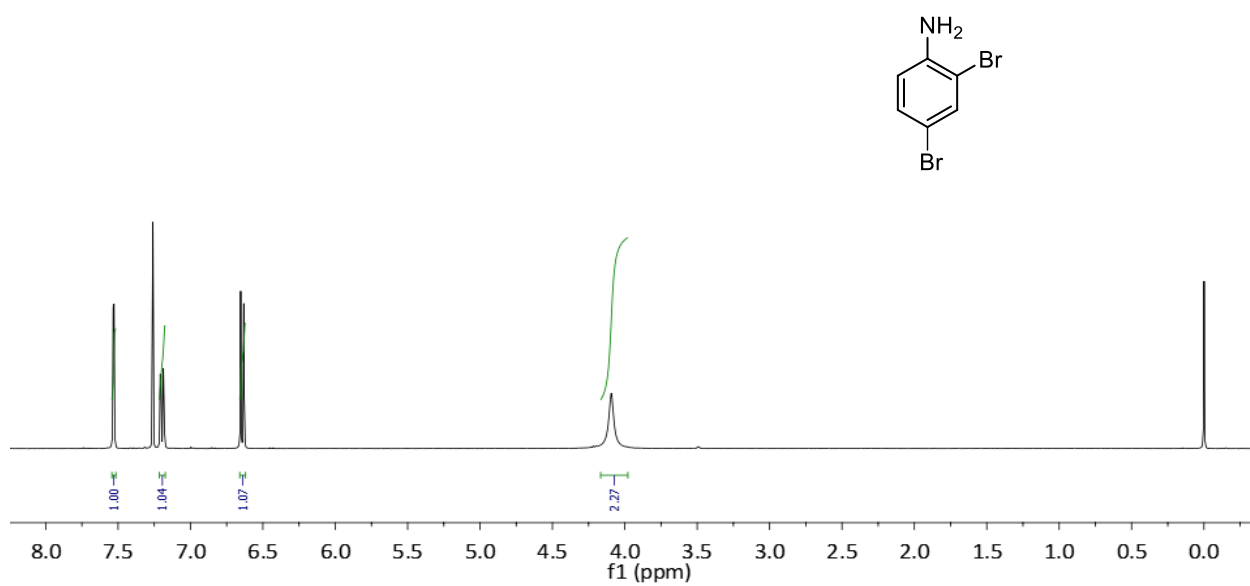

$^1\text{H}$ -NMR of 4c in  $\text{CDCl}_3$

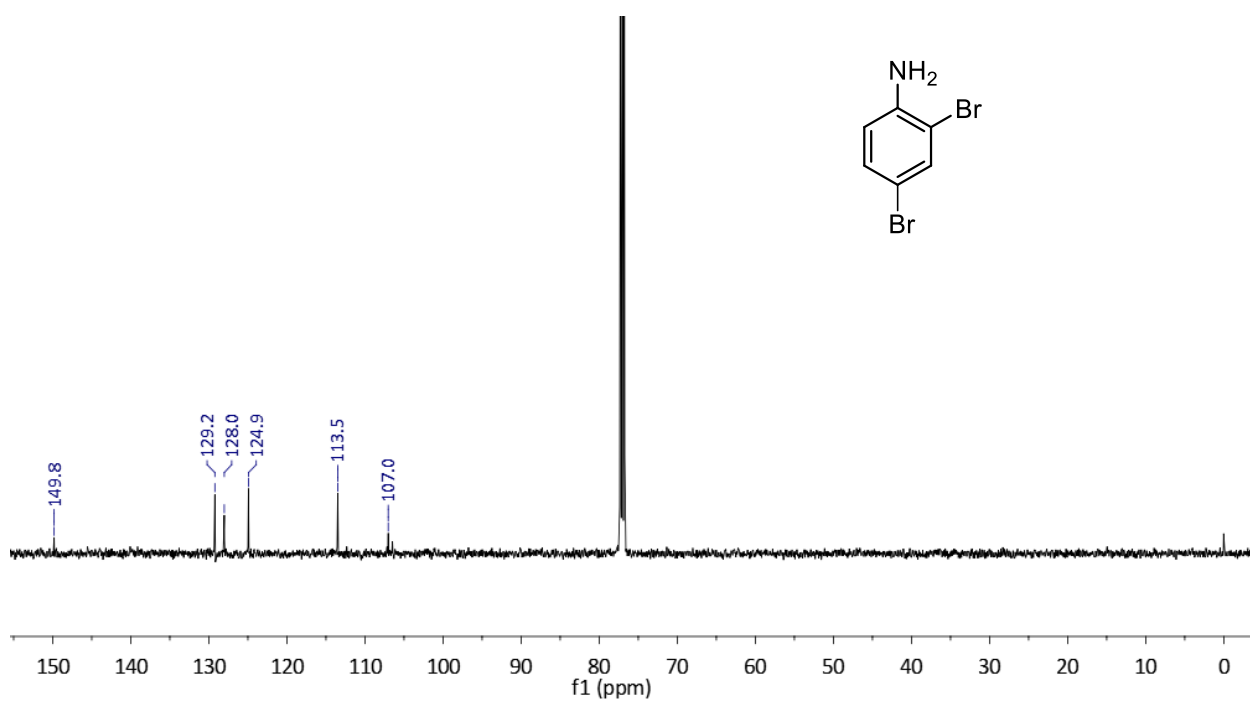

$^{13}\text{C}$  NMR of 4c in  $\text{CDCl}_3$

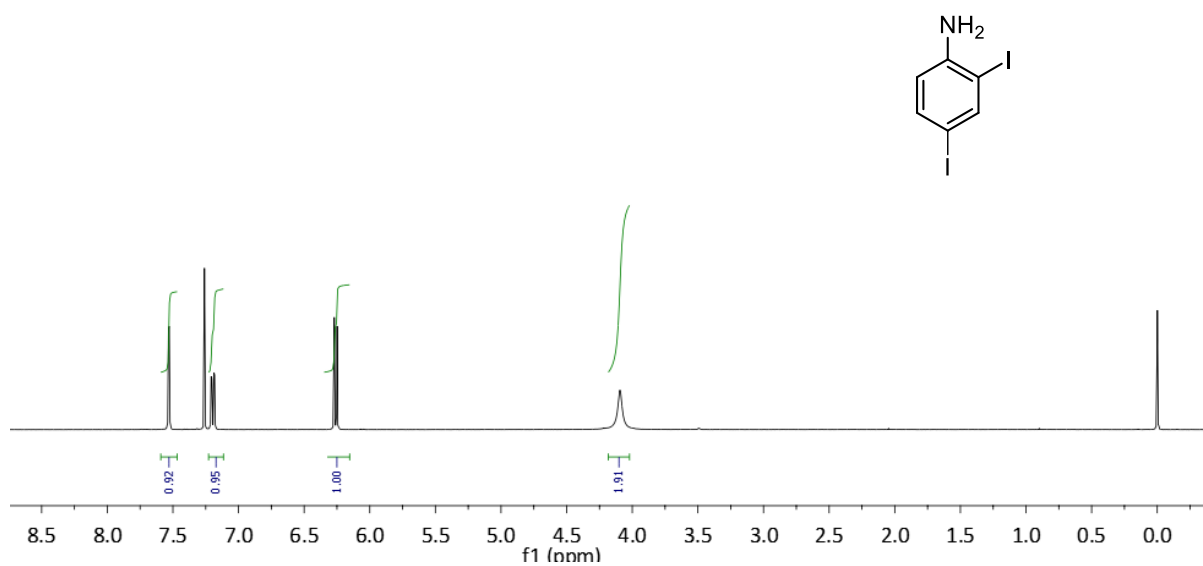

<sup>1</sup>H-NMR of 4d in CDCl<sub>3</sub>

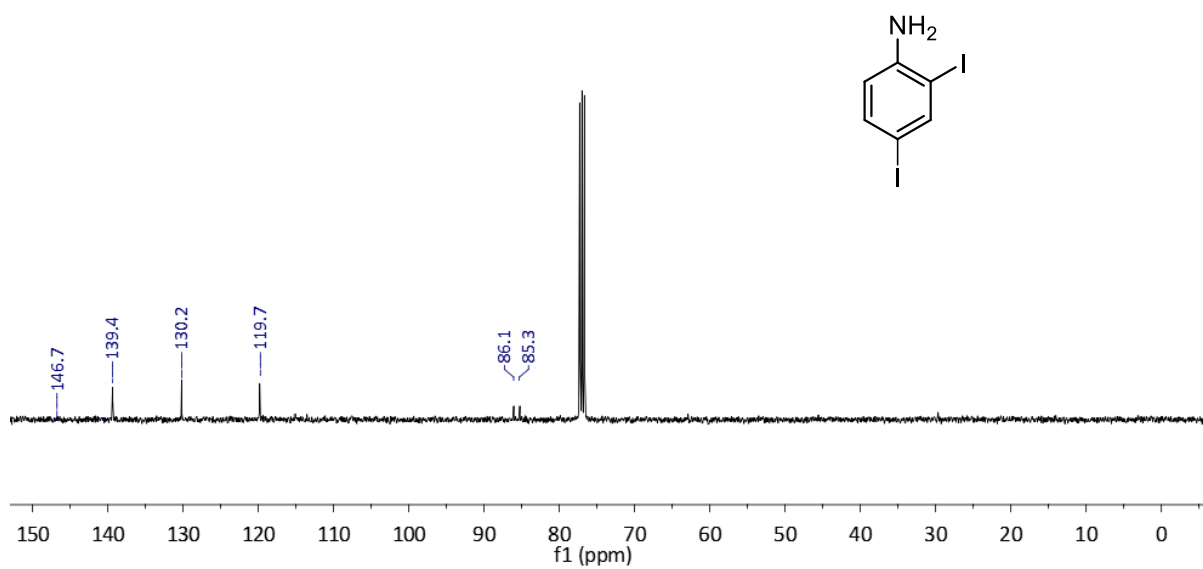

<sup>13</sup>C NMR of 4d in CDCl<sub>3</sub>



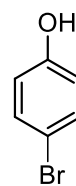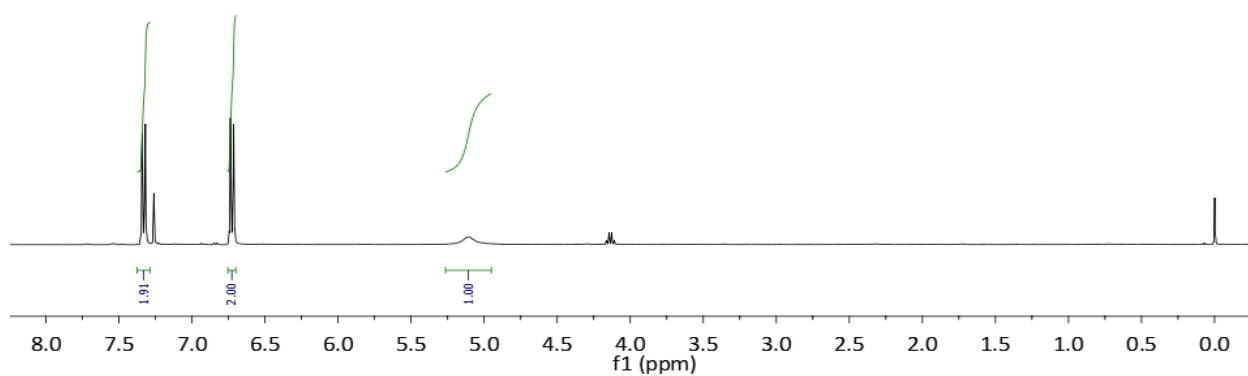

<sup>1</sup>H-NMR of 5a in CDCl<sub>3</sub>

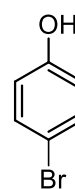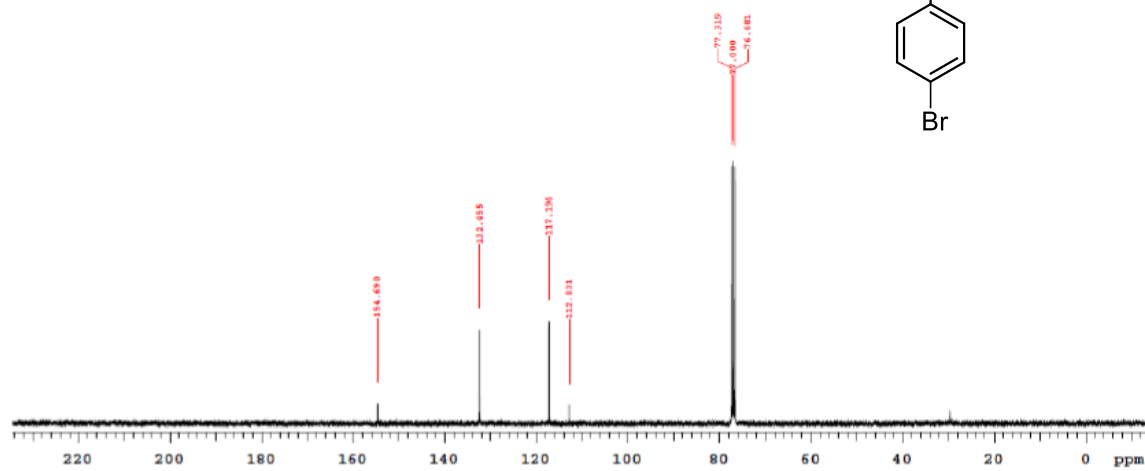

<sup>13</sup>C NMR of 5a in CDCl<sub>3</sub>

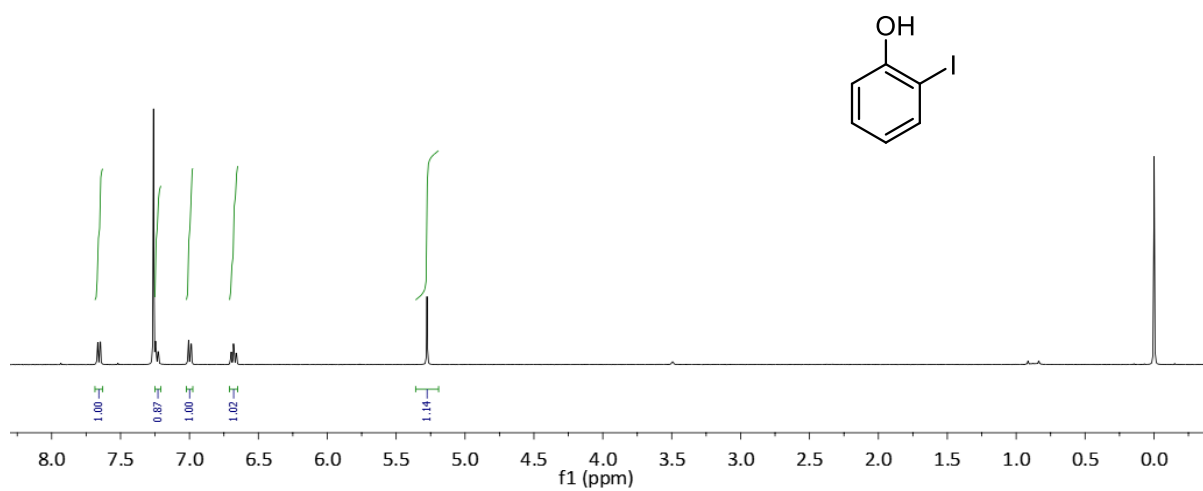

$^1\text{H-NMR}$  of **5b** in  $\text{CDCl}_3$

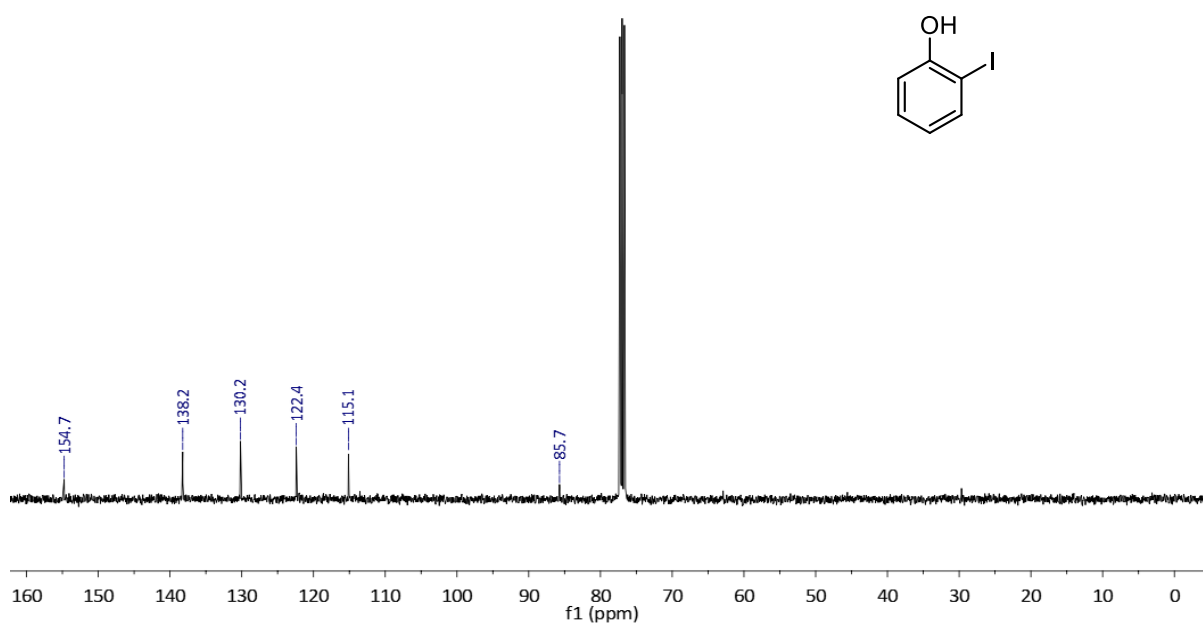

$^{13}\text{C-NMR}$  of **5b** in  $\text{CDCl}_3$

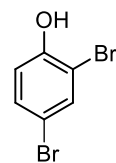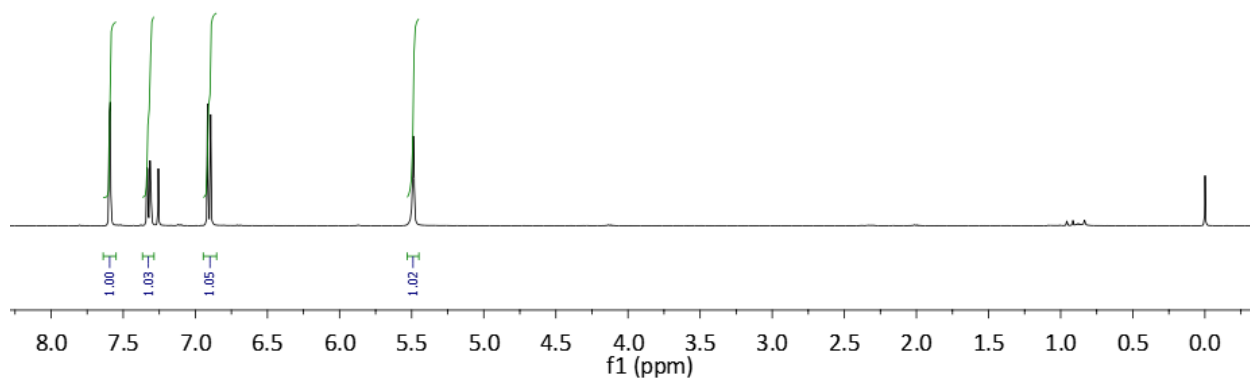

$^1\text{H}$ -NMR of 5c in  $\text{CDCl}_3$

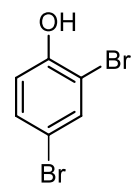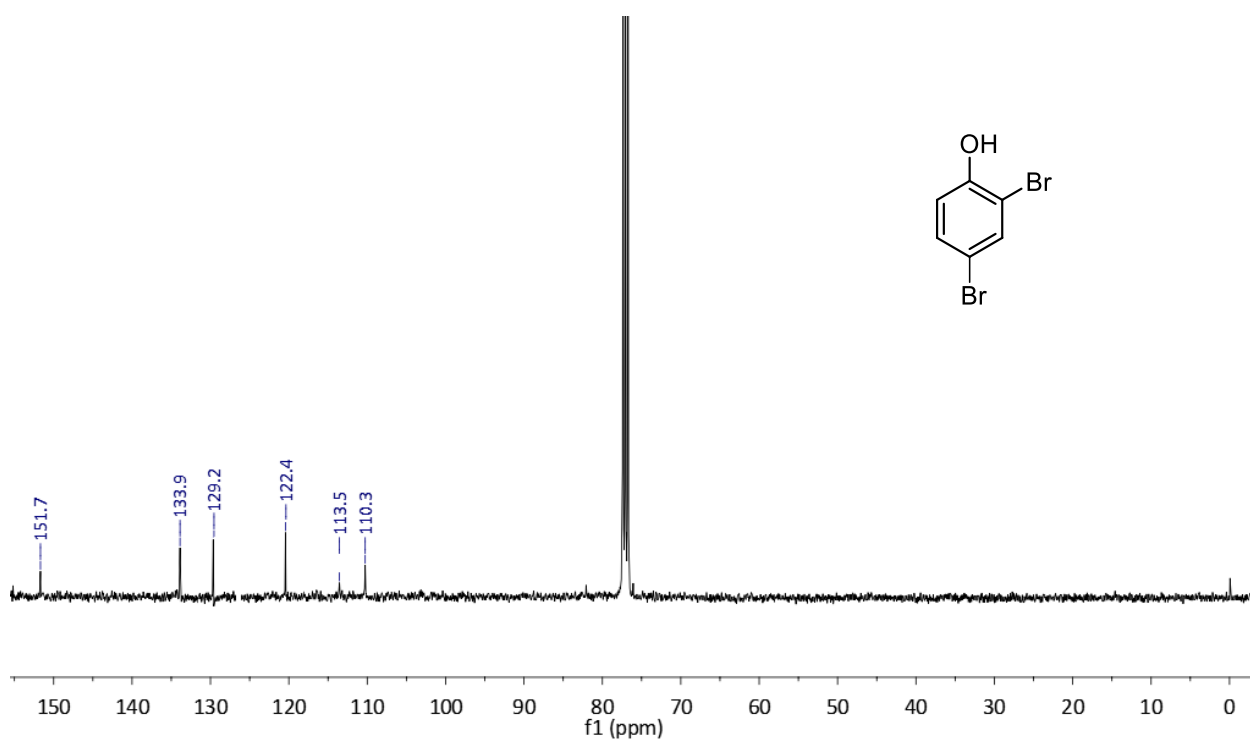

$^{13}\text{C}$  NMR of 5c in  $\text{CDCl}_3$

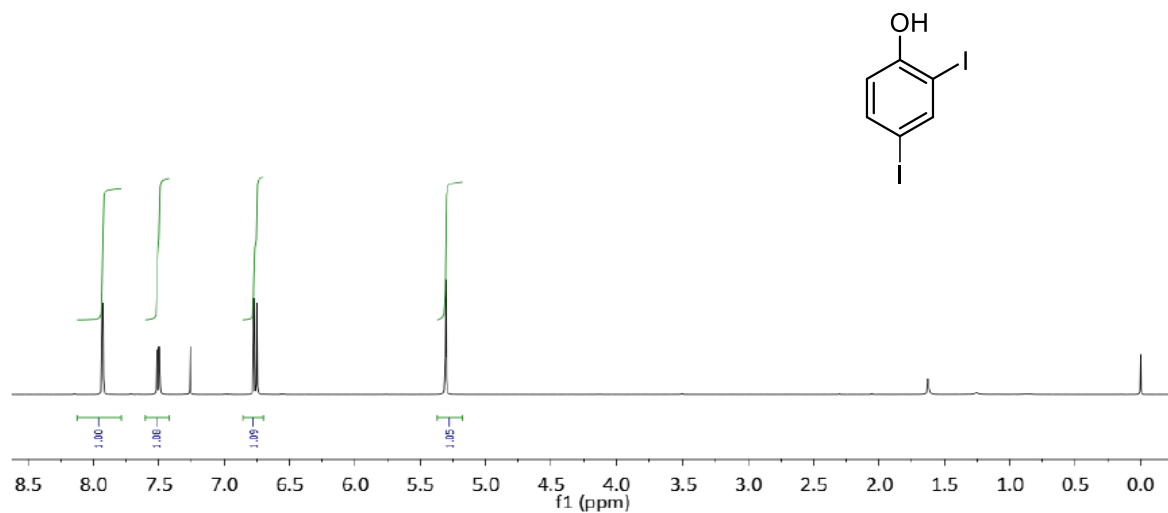

$^1\text{H}$ -NMR of 5d in  $\text{CDCl}_3$

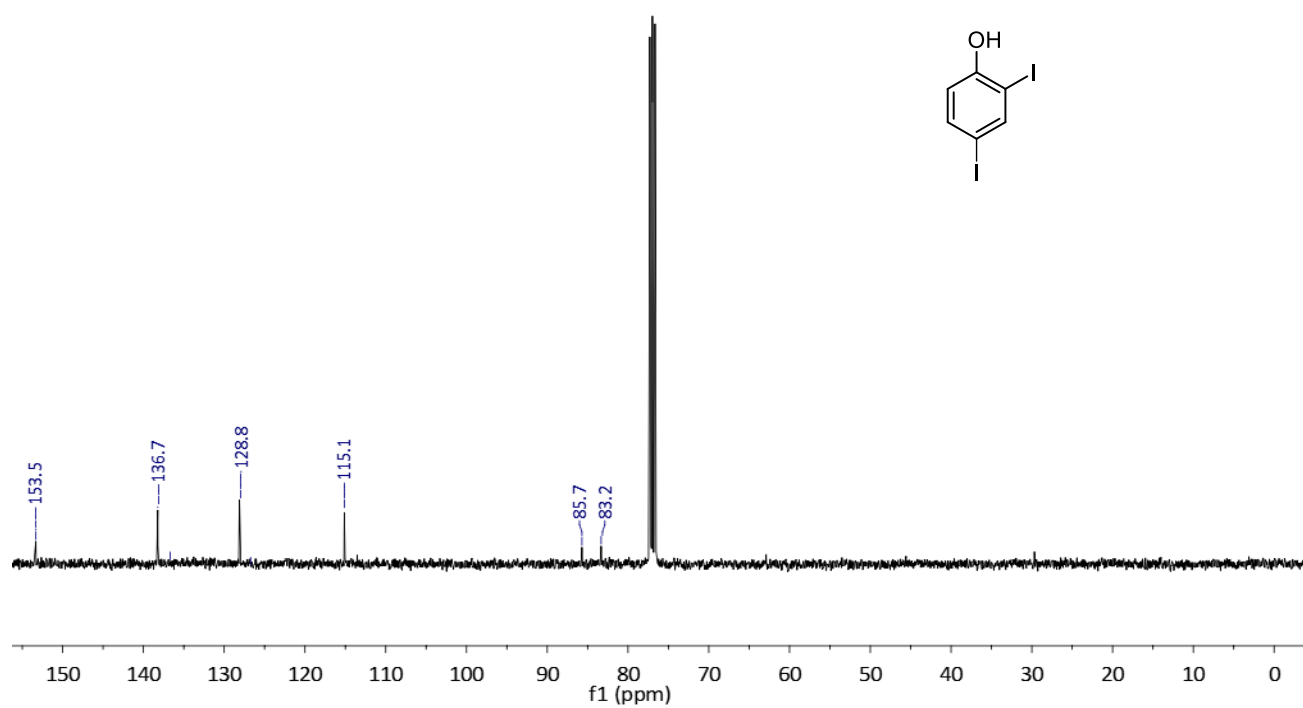

$^{13}\text{C}$  NMR of 5d in  $\text{CDCl}_3$

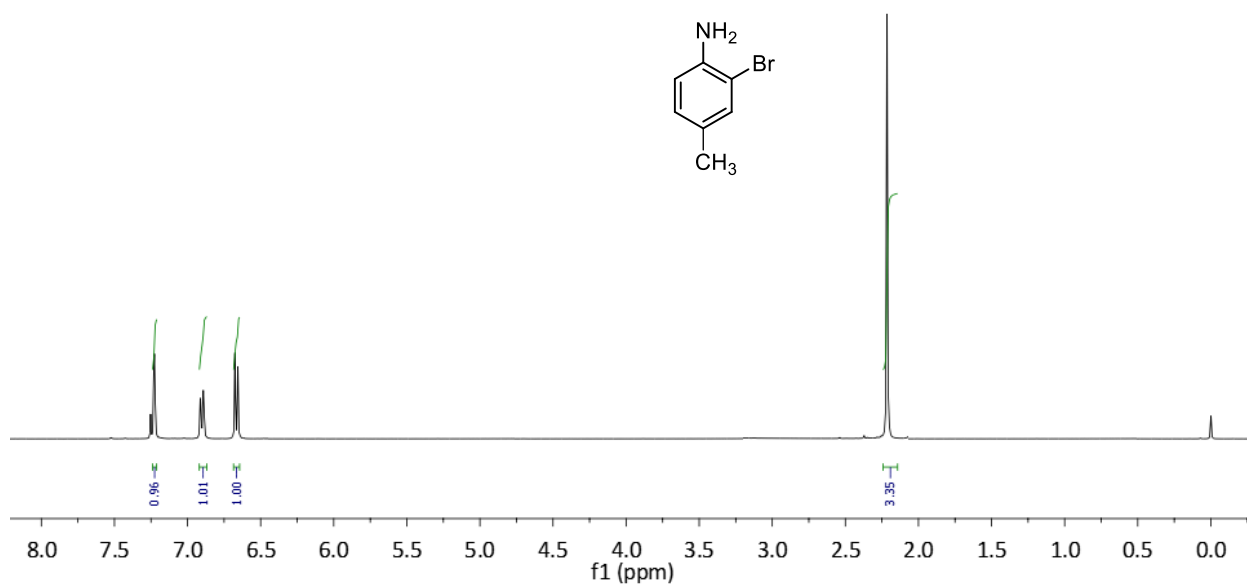

$^1\text{H-NMR}$  of **6a** in  $\text{CDCl}_3$

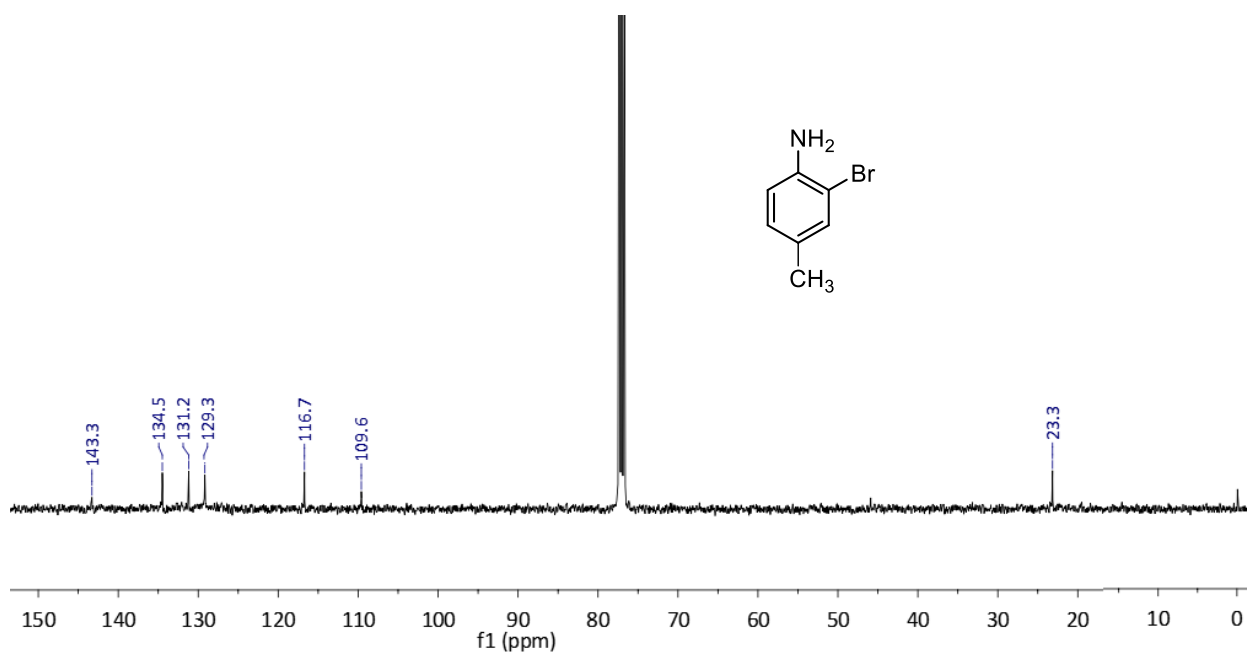

$^{13}\text{C-NMR}$  of **6a** in  $\text{CDCl}_3$

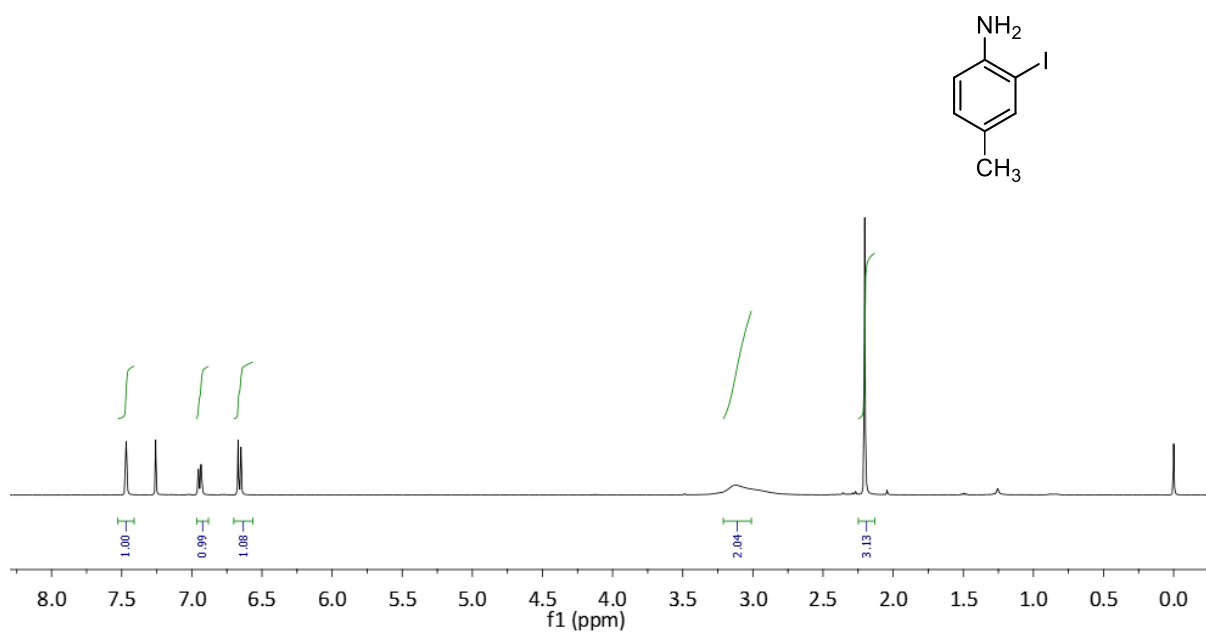

$^1\text{H-NMR}$  of 6b in  $\text{CDCl}_3$

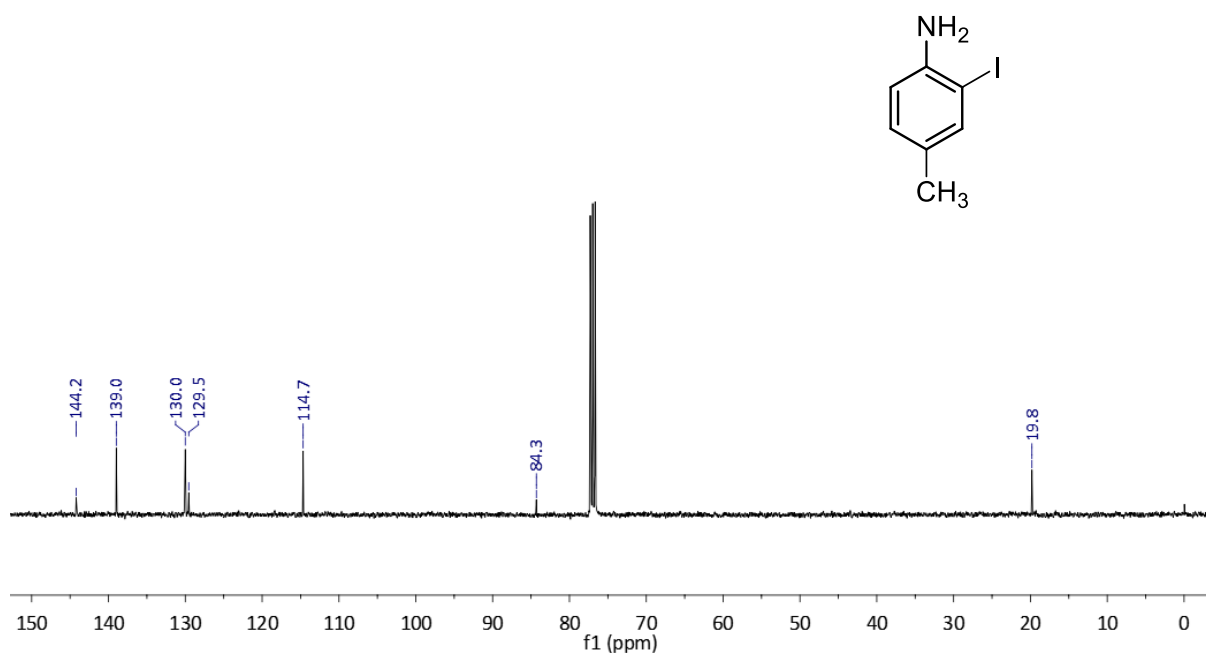

$^{13}\text{C-NMR}$  of 6b in  $\text{CDCl}_3$

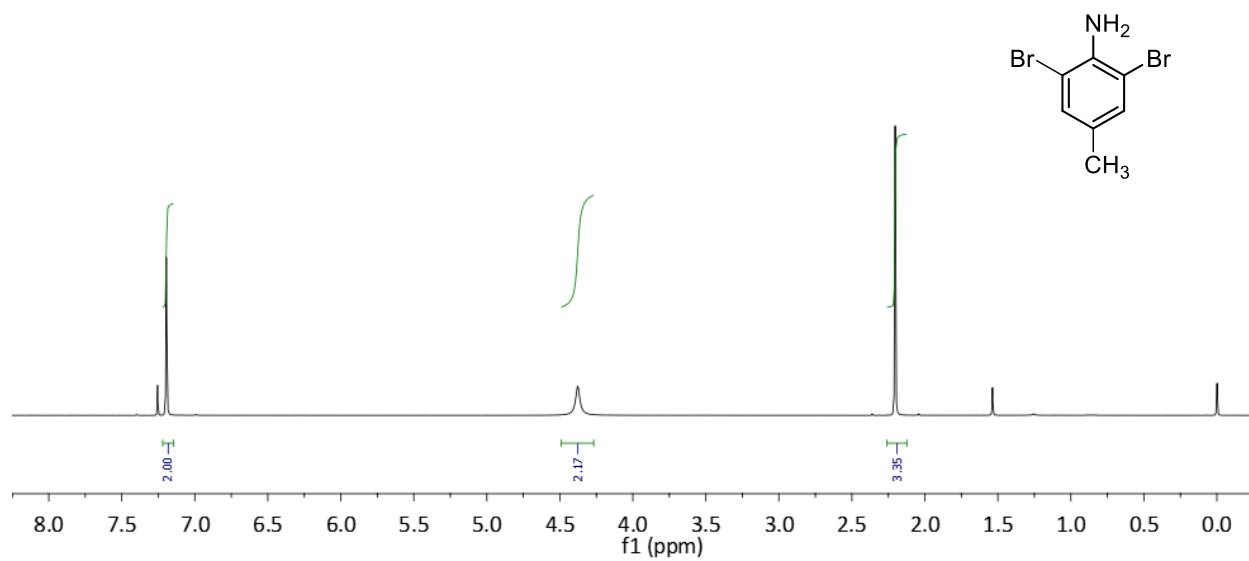

$^1\text{H-NMR}$  of **6c** in  $\text{CDCl}_3$

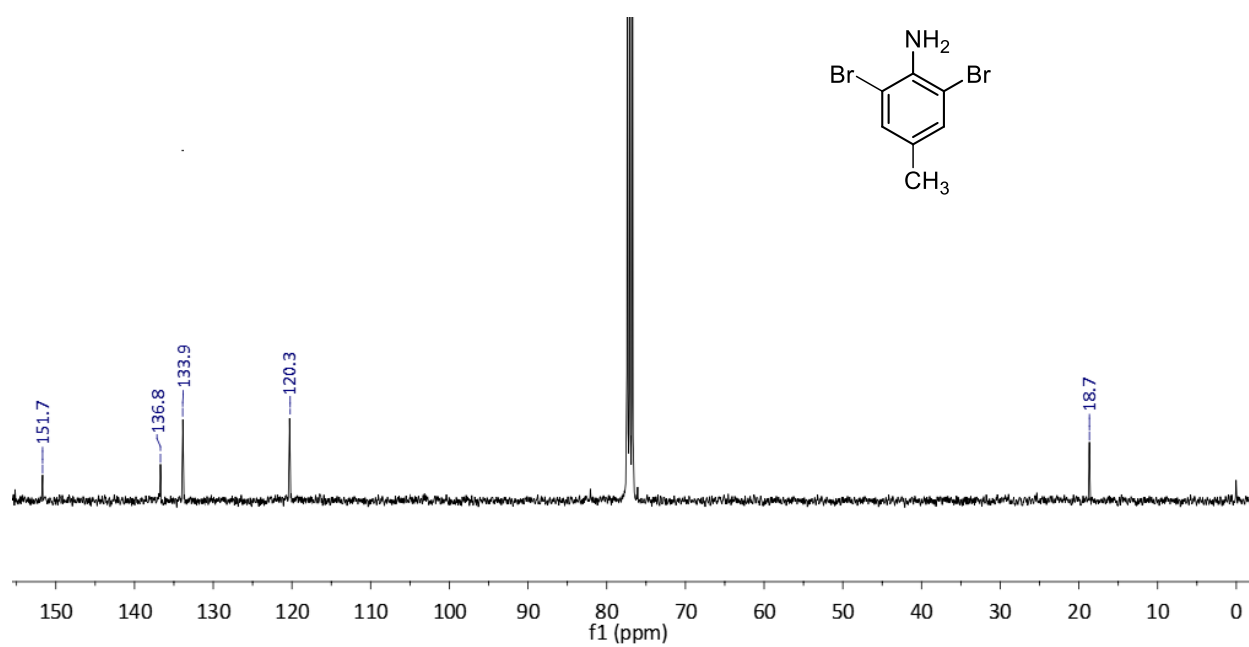

$^{13}\text{C-NMR}$  of **6c** in  $\text{CDCl}_3$

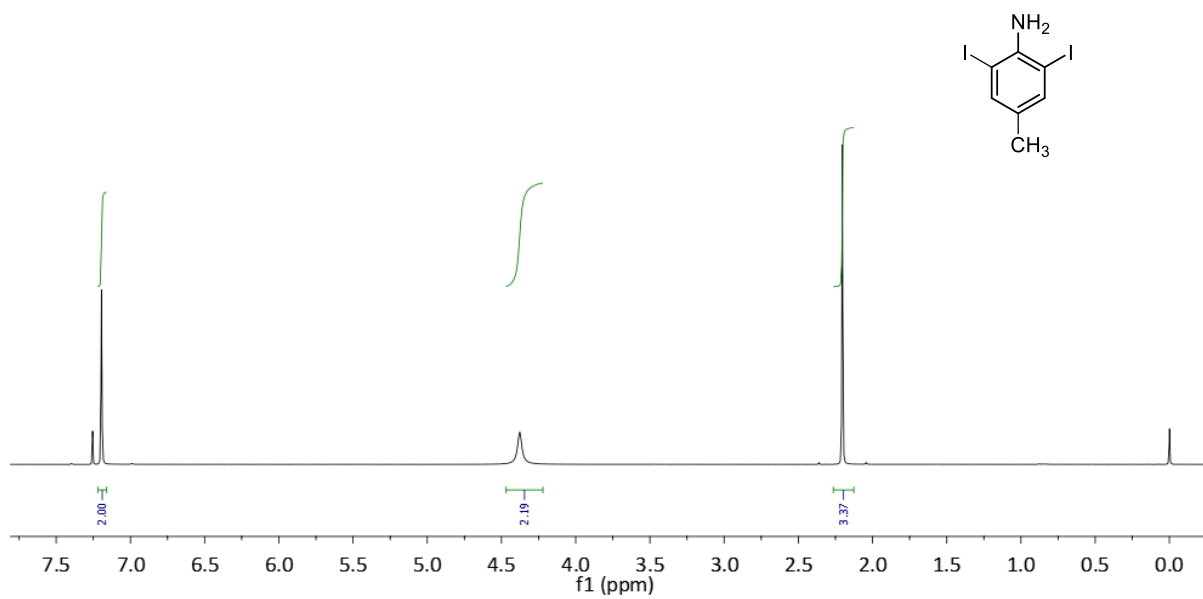

<sup>1</sup>H-NMR of 6d in CDCl<sub>3</sub>

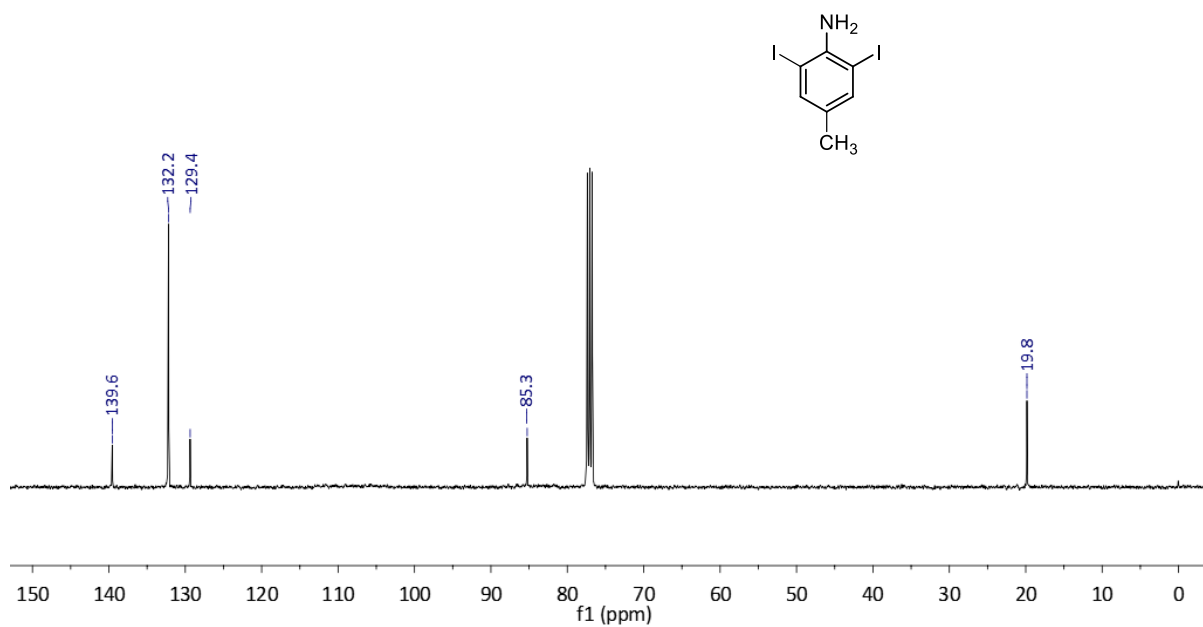

<sup>13</sup>C NMR of 6d in CDCl<sub>3</sub>



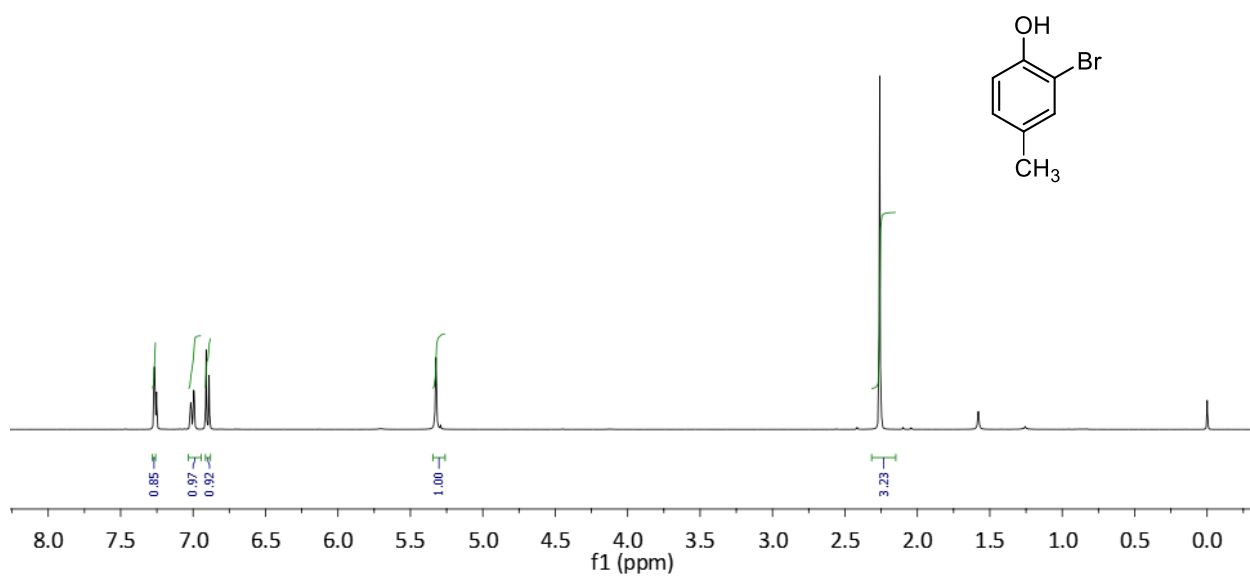

<sup>1</sup>H-NMR of 7a in CDCl<sub>3</sub>

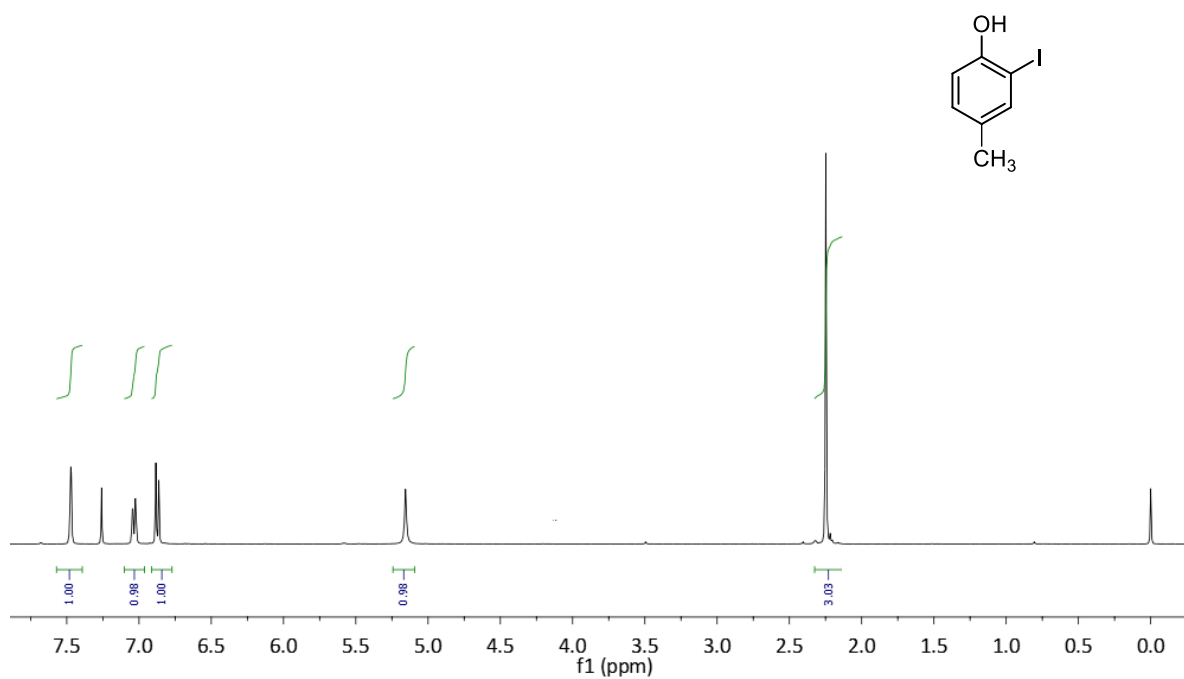

<sup>1</sup>H-NMR of 7b in CDCl<sub>3</sub>

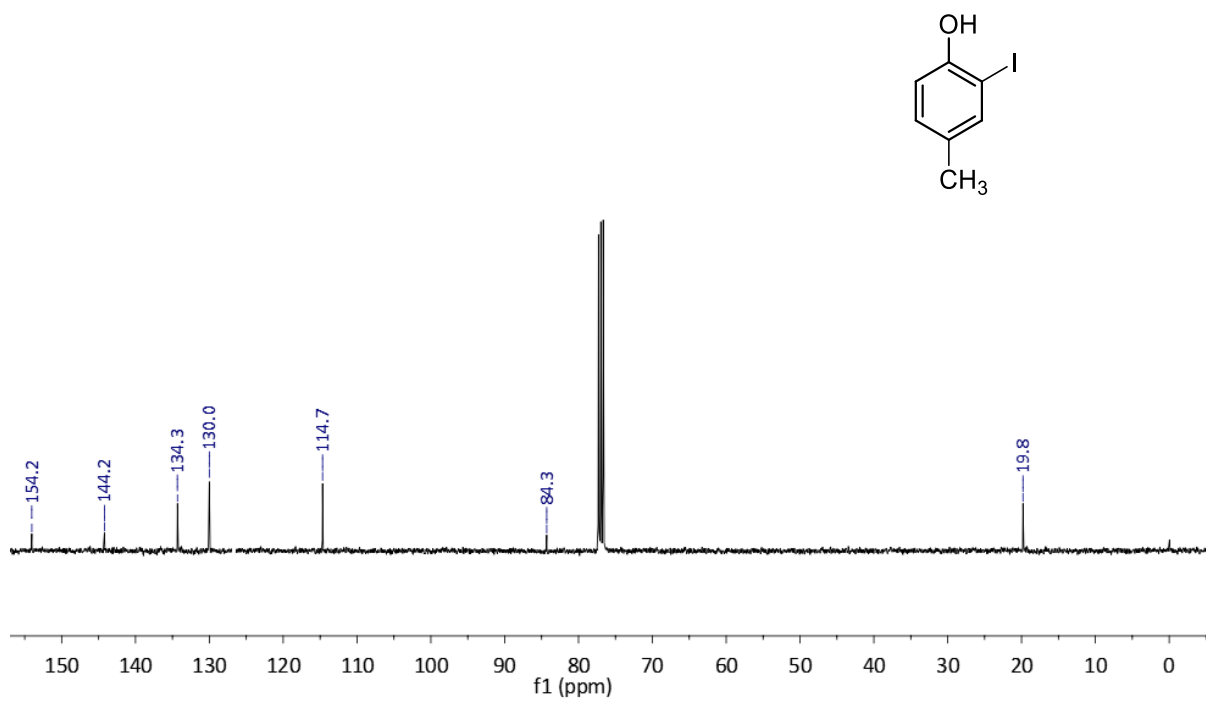

$^{13}\text{C}$  NMR of 7b in  $\text{CDCl}_3$

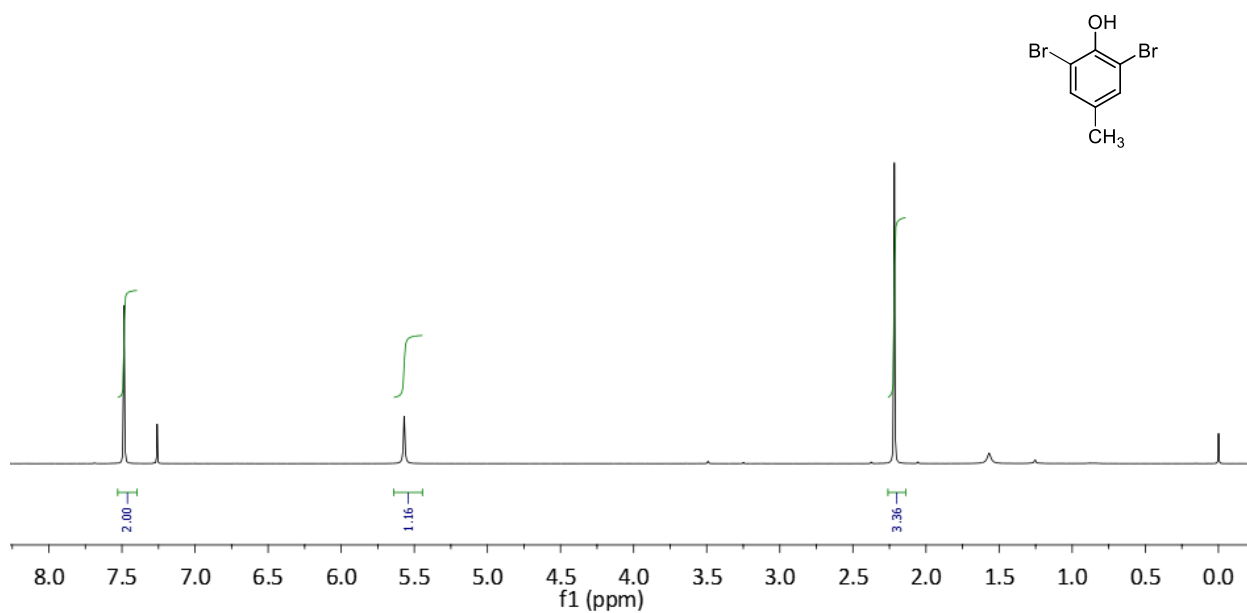

$^1\text{H}$ -NMR of 7c in  $\text{CDCl}_3$

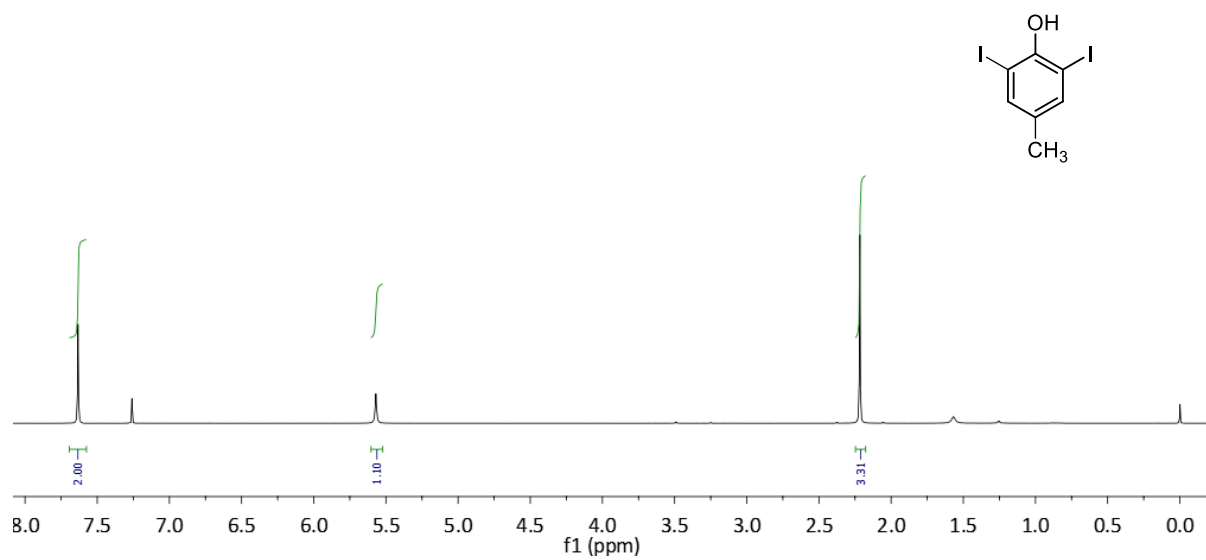

<sup>1</sup>H-NMR of 7d in CDCl<sub>3</sub>

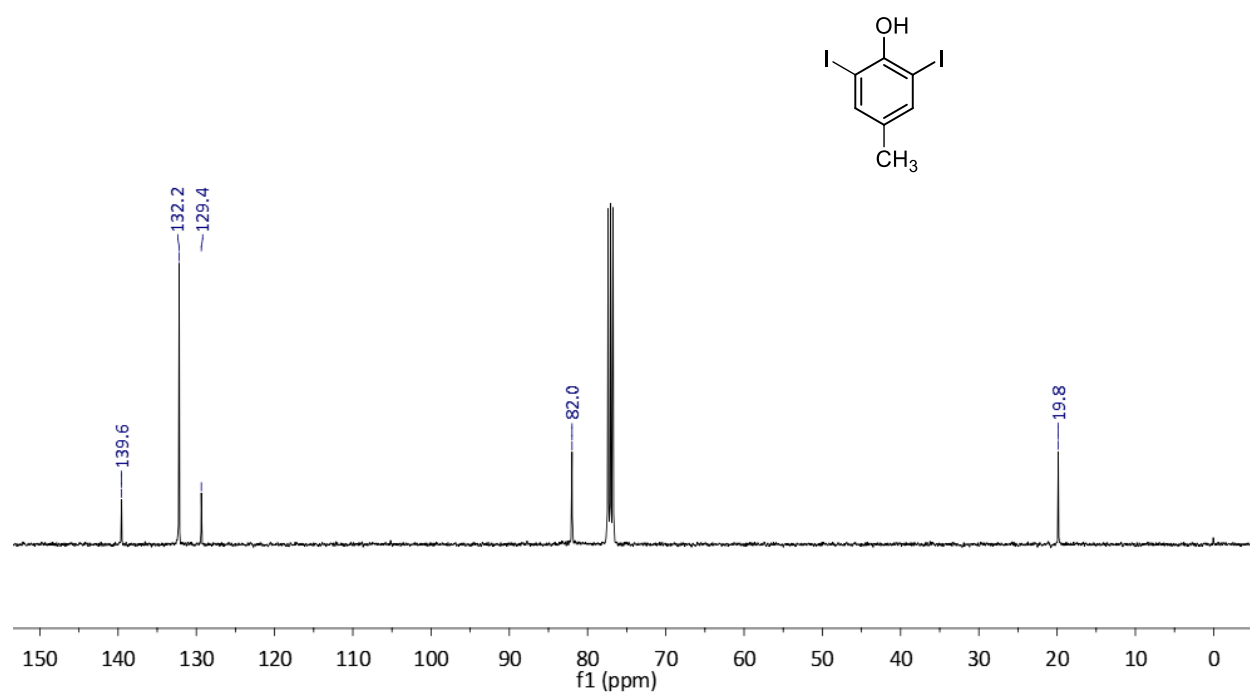

<sup>13</sup>C NMR of 7d in CDCl<sub>3</sub>

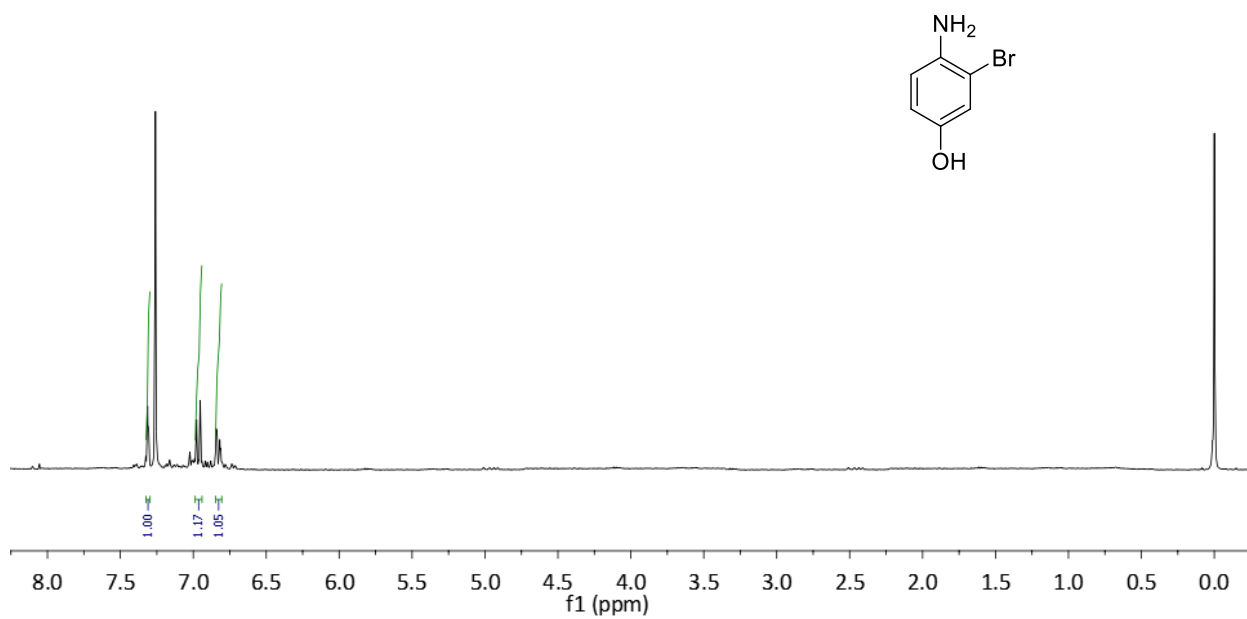

$^1\text{H}$ -NMR of 8a in  $\text{CDCl}_3$

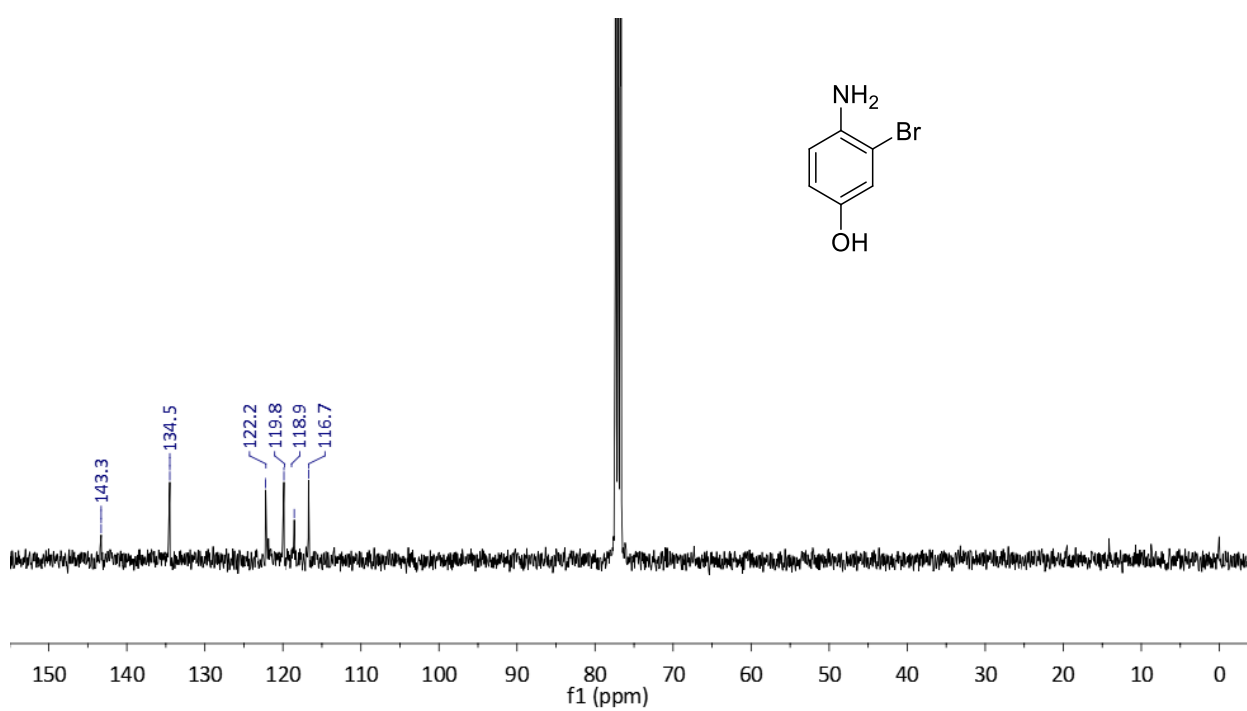

$^{13}\text{C}$  NMR of 8a in  $\text{CDCl}_3$

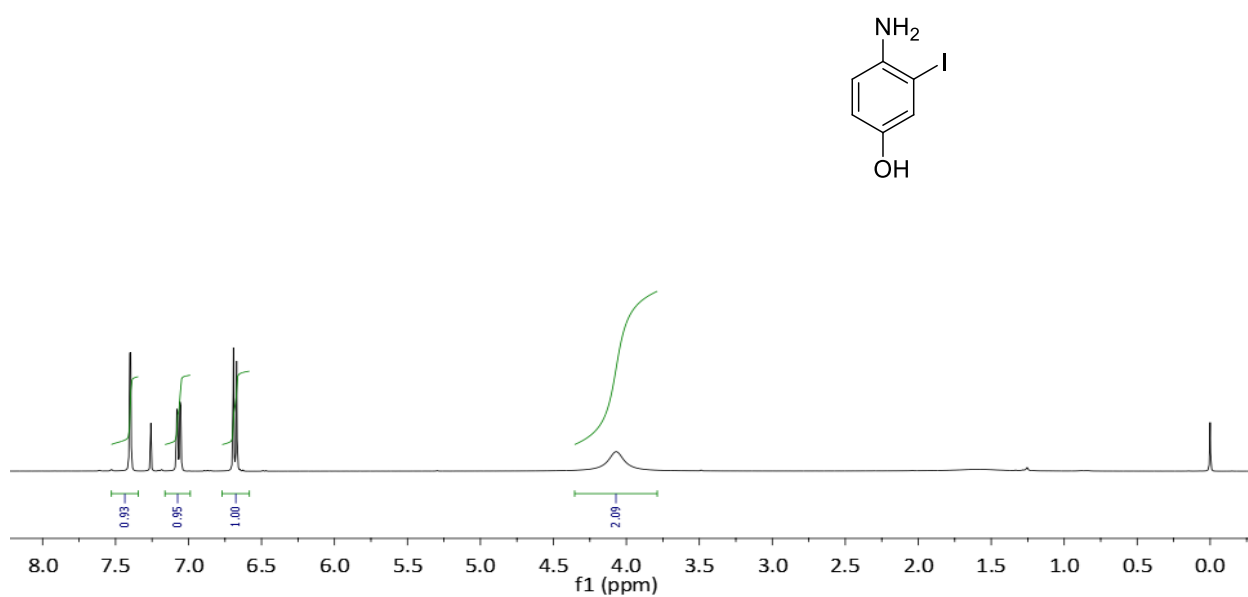

$^1\text{H}$ -NMR of 8b in  $\text{CDCl}_3$

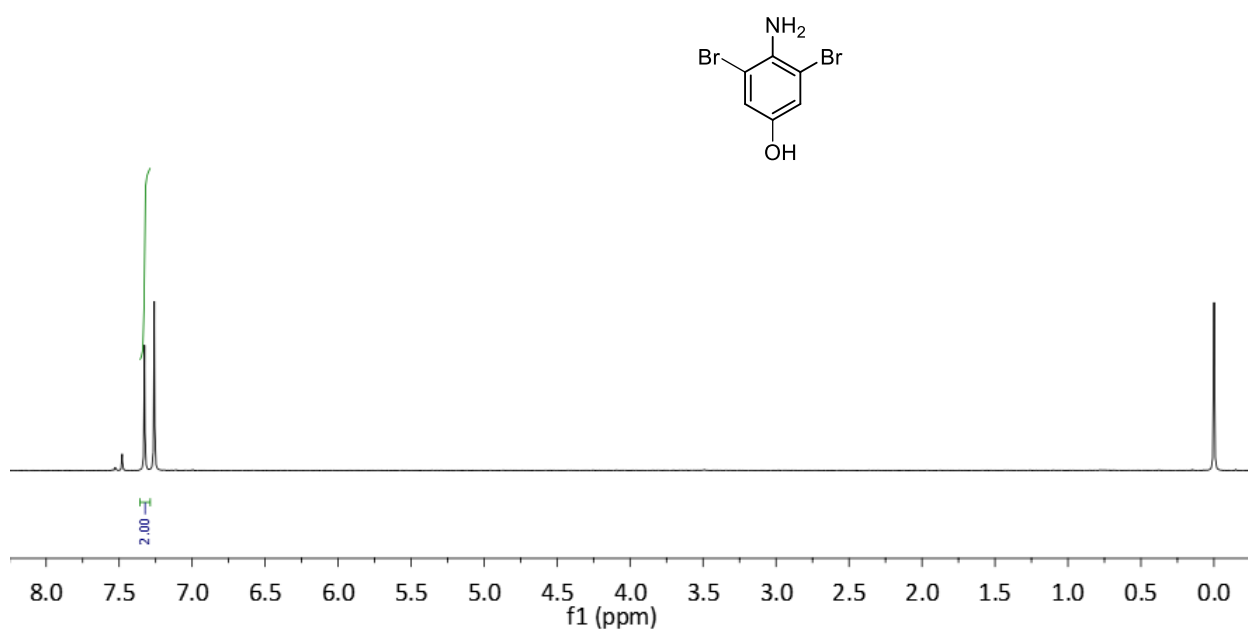

$^1\text{H}$ -NMR of 8c in  $\text{CDCl}_3$

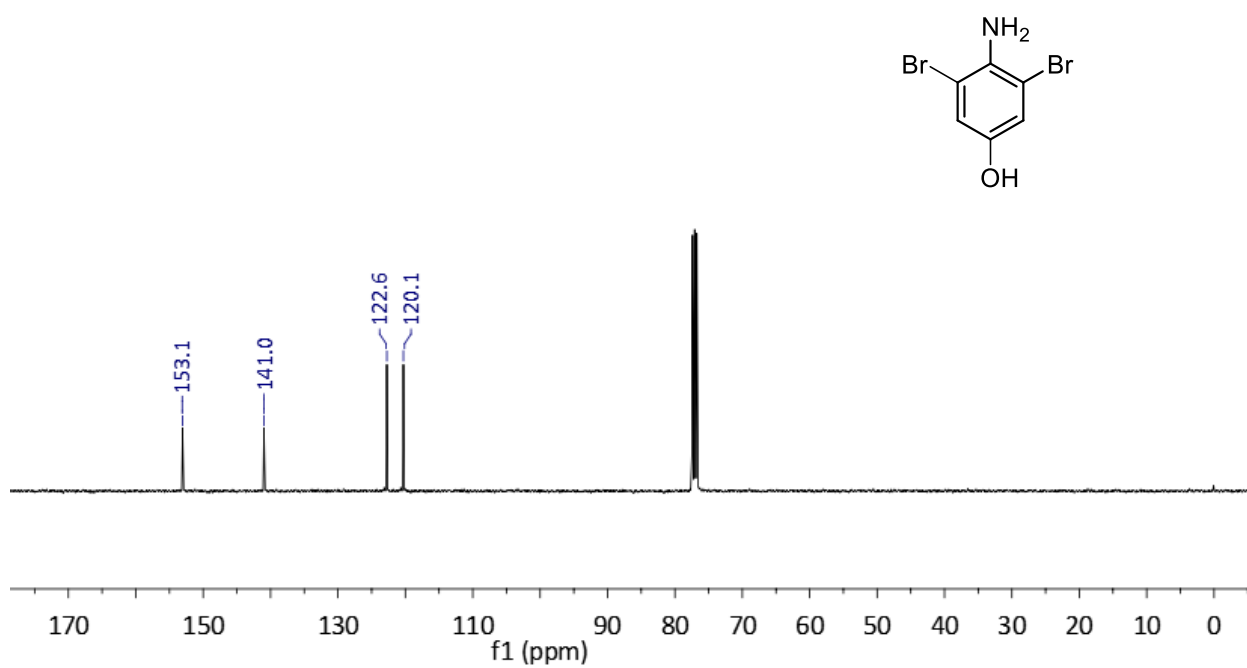

$^{13}\text{C}$  NMR of 8c in  $\text{CDCl}_3$

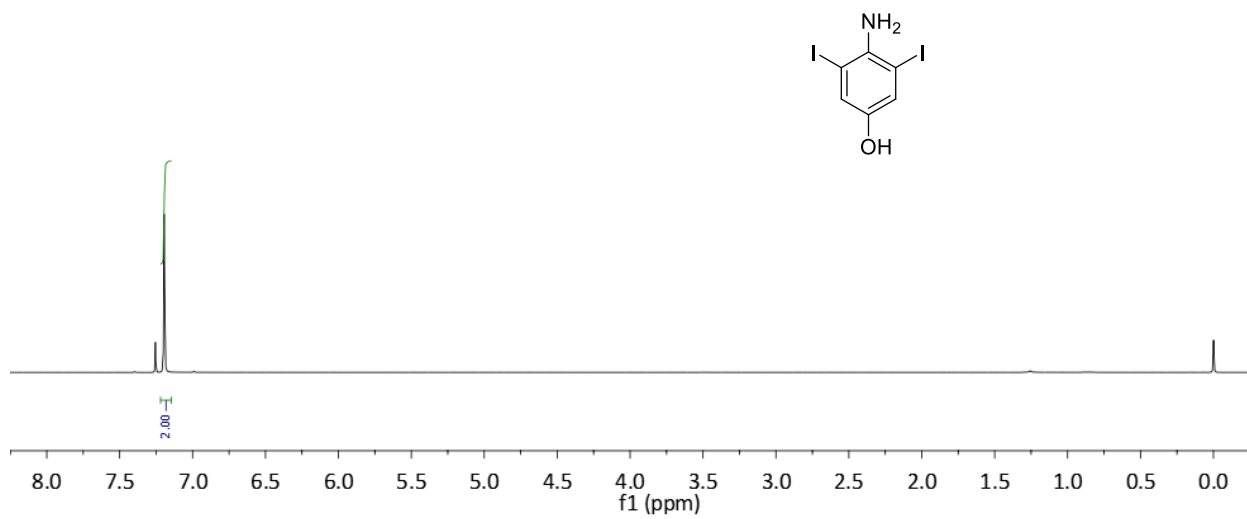

$^1\text{H}$ -NMR of 8d in  $\text{CDCl}_3$

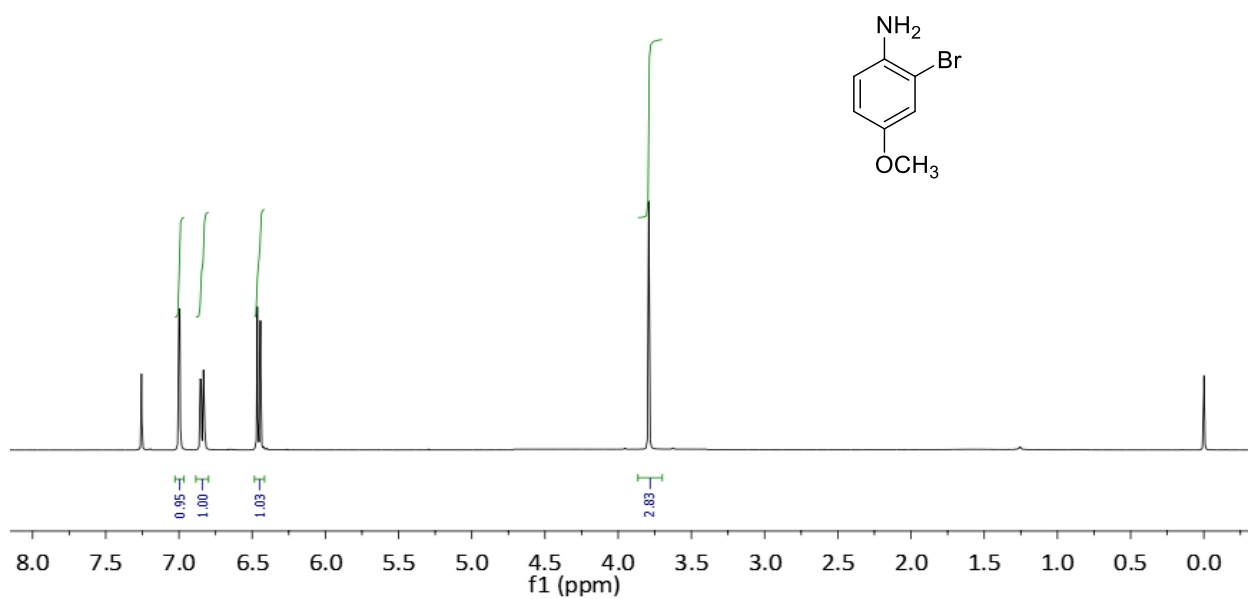

$^1\text{H}$ -NMR of 9a in  $\text{CDCl}_3$

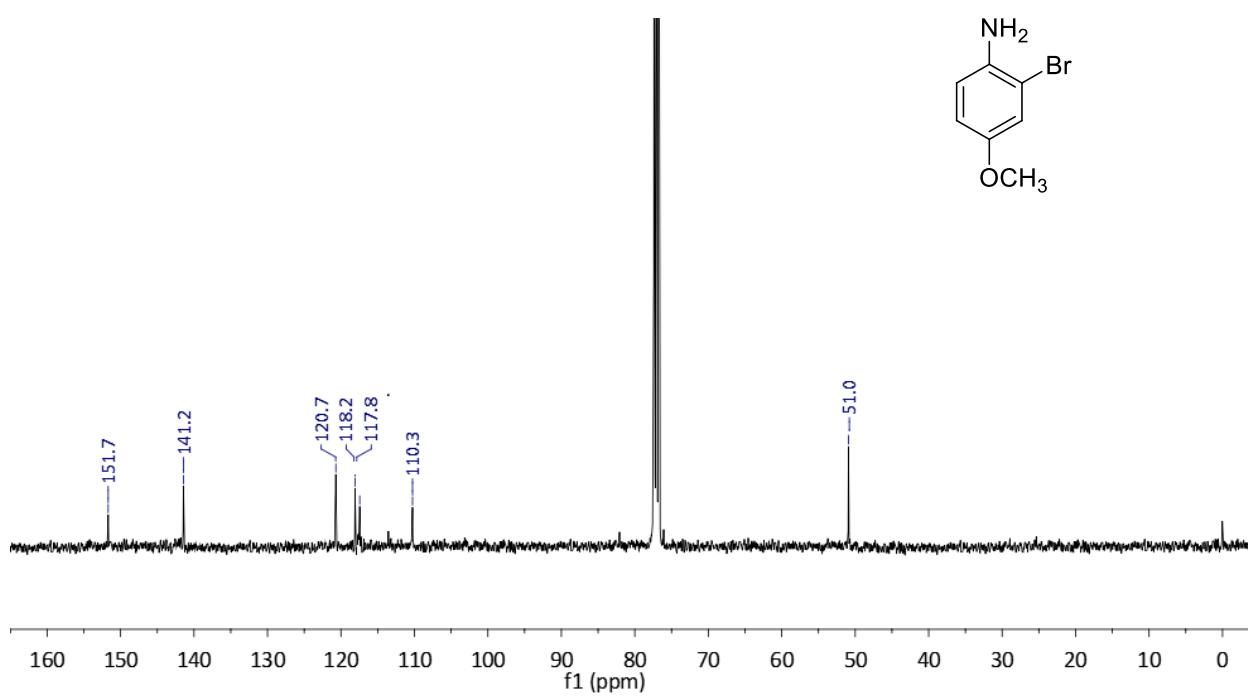

$^{13}\text{C}$  NMR of 9a in  $\text{CDCl}_3$

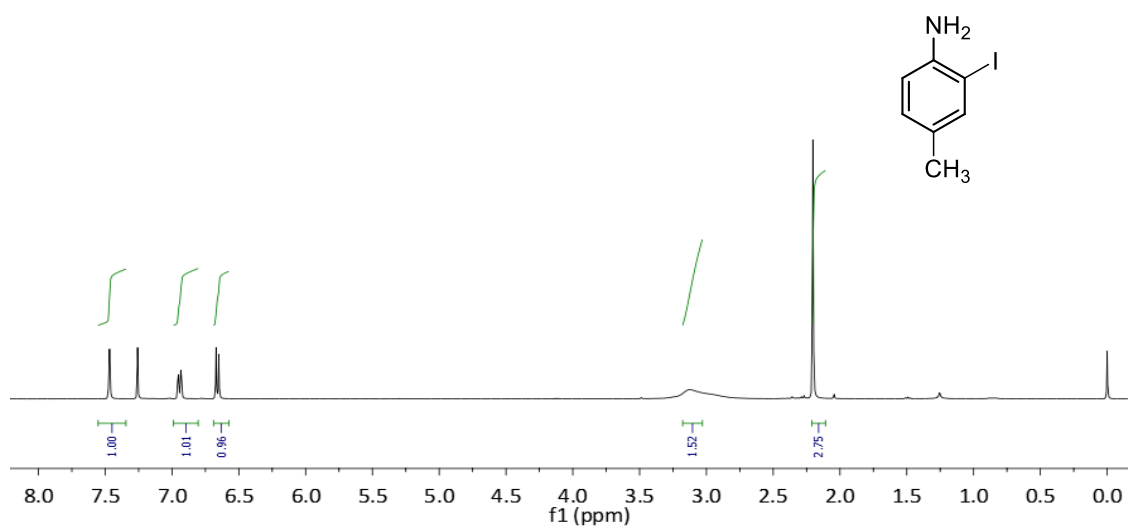

<sup>1</sup>H-NMR of 9b in CDCl<sub>3</sub>

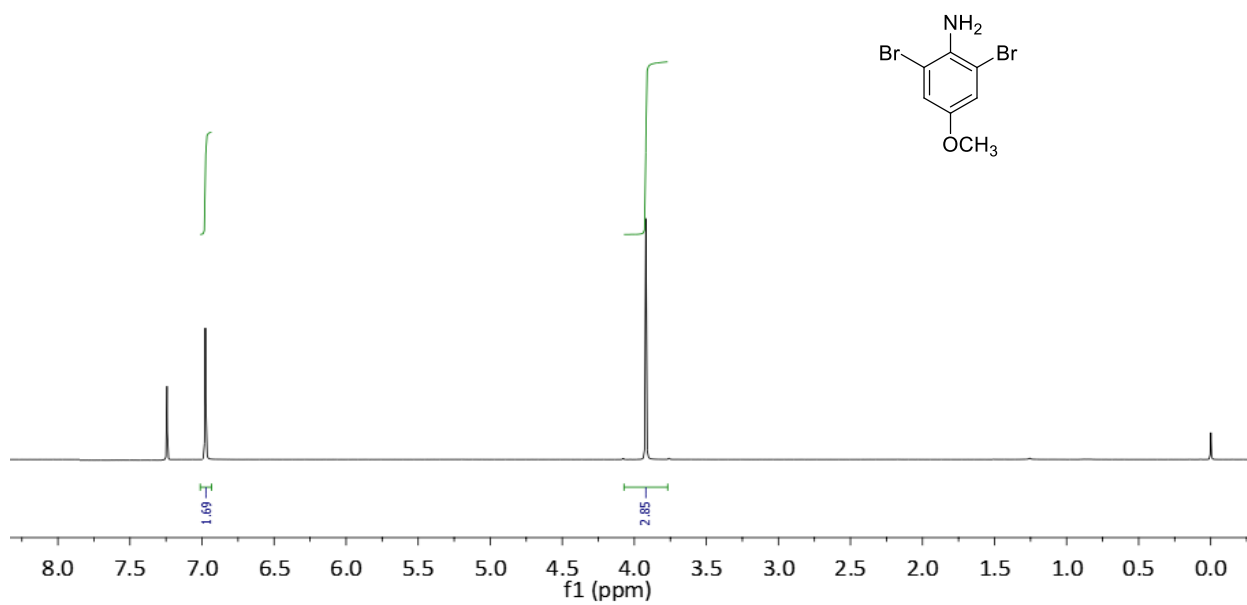

<sup>1</sup>H-NMR of 9c in CDCl<sub>3</sub>



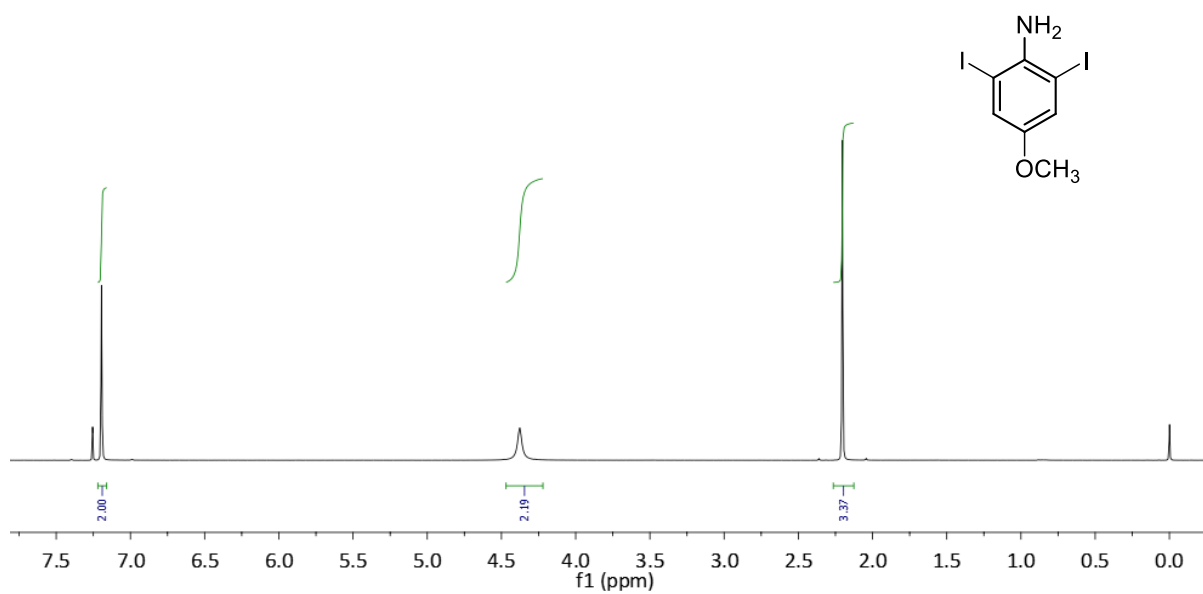

$^1\text{H-NMR}$  of 9d in  $\text{CDCl}_3$

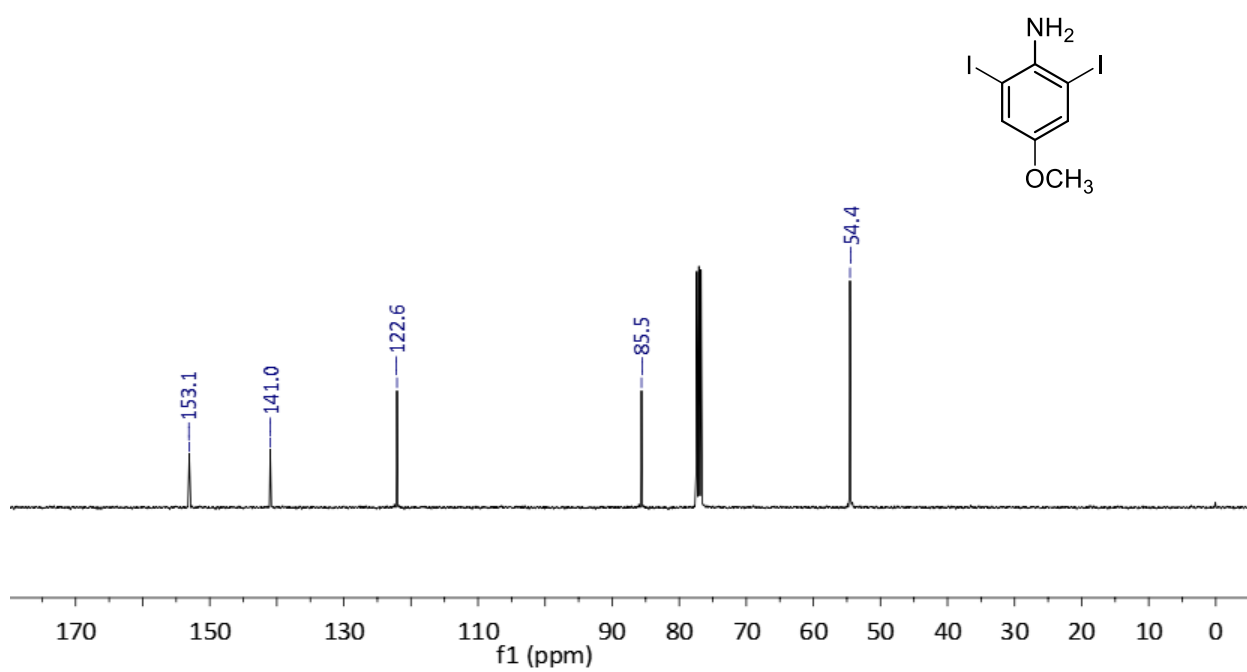

$^{13}\text{C-NMR}$  of 9d in  $\text{CDCl}_3$

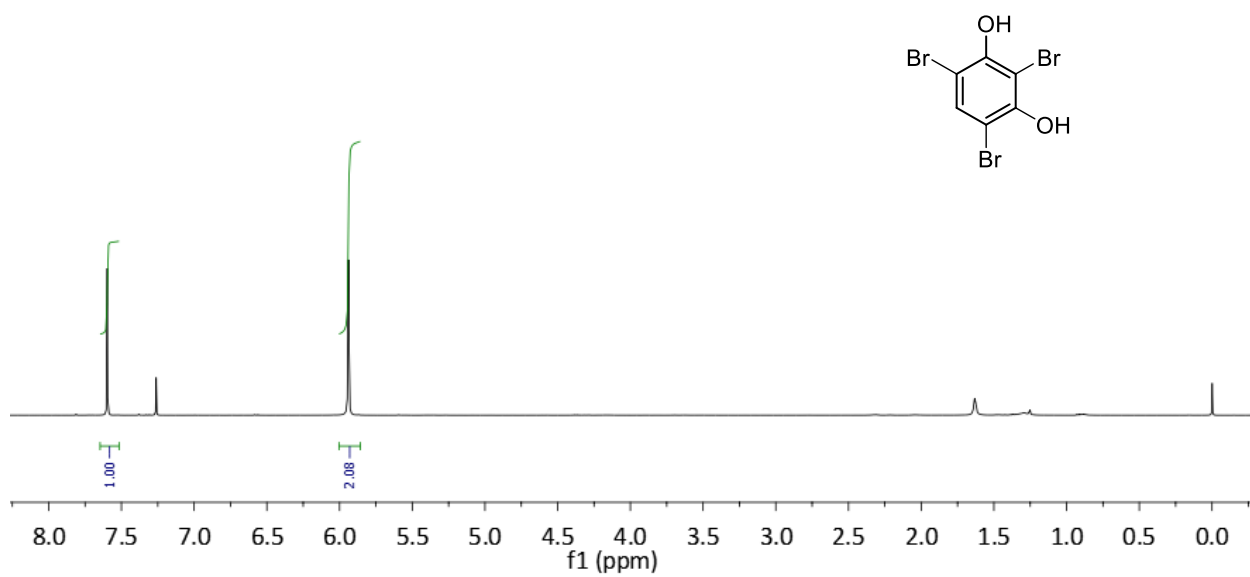

$^1\text{H-NMR}$  of 10a in  $\text{CDCl}_3$

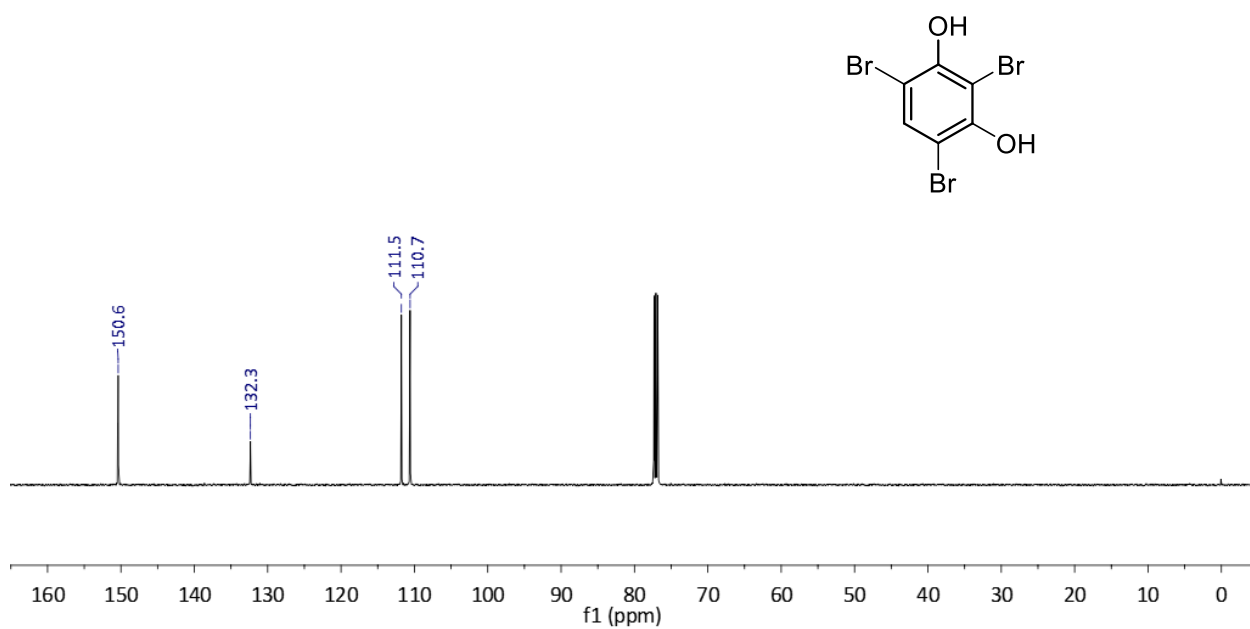

$^{13}\text{C-NMR}$  of 10a in  $\text{CDCl}_3$

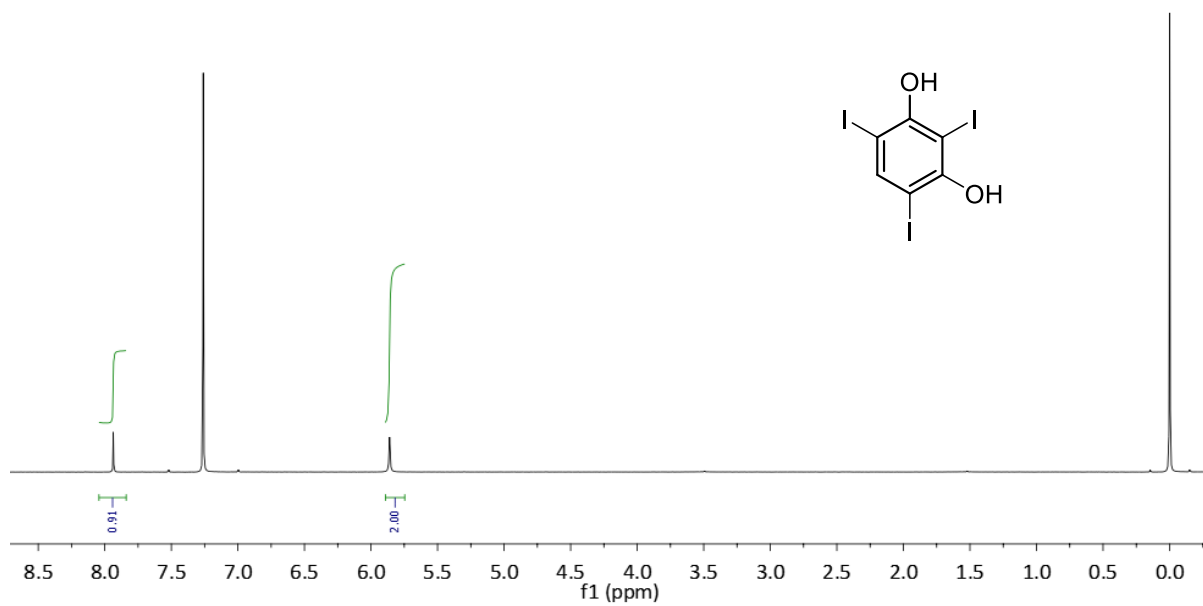

$^1\text{H-NMR}$  of 10b in  $\text{CDCl}_3$

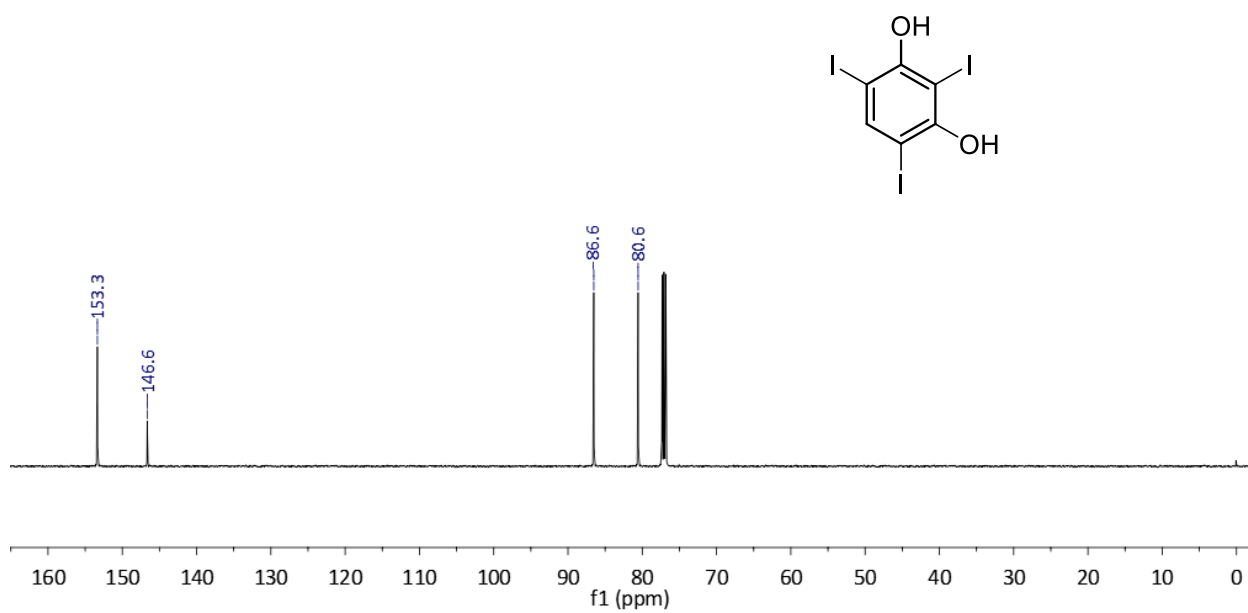

$^{13}\text{C-NMR}$  of 10b in  $\text{CDCl}_3$

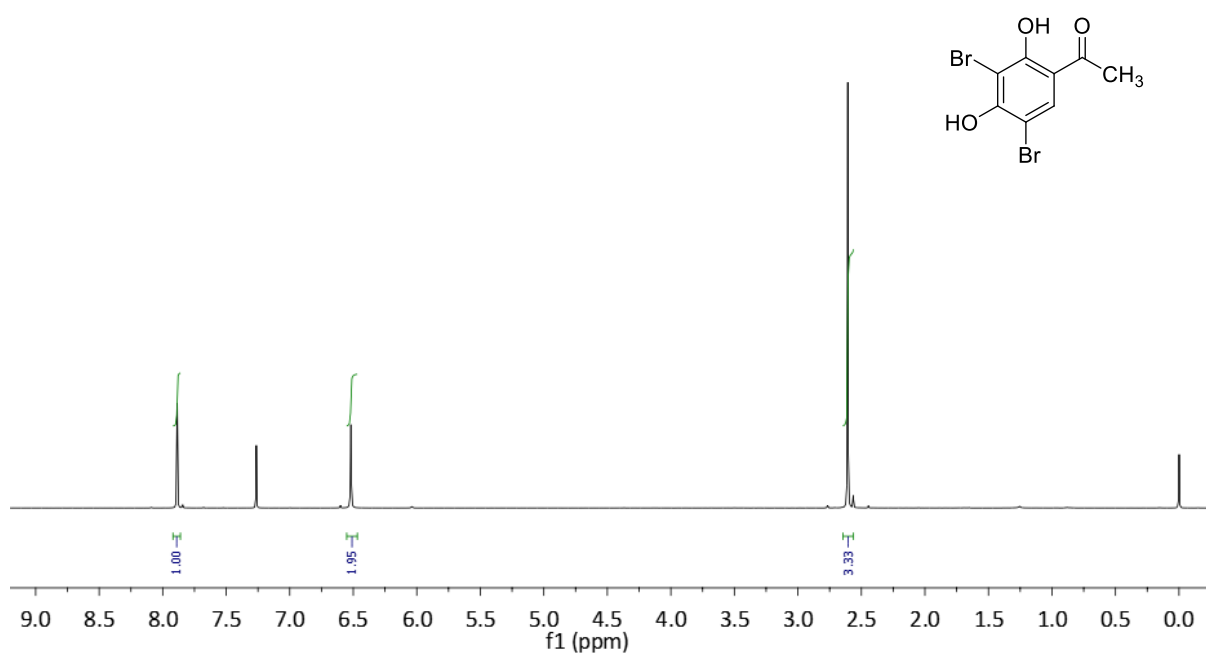

$^1\text{H-NMR}$  of 11a in  $\text{CDCl}_3$

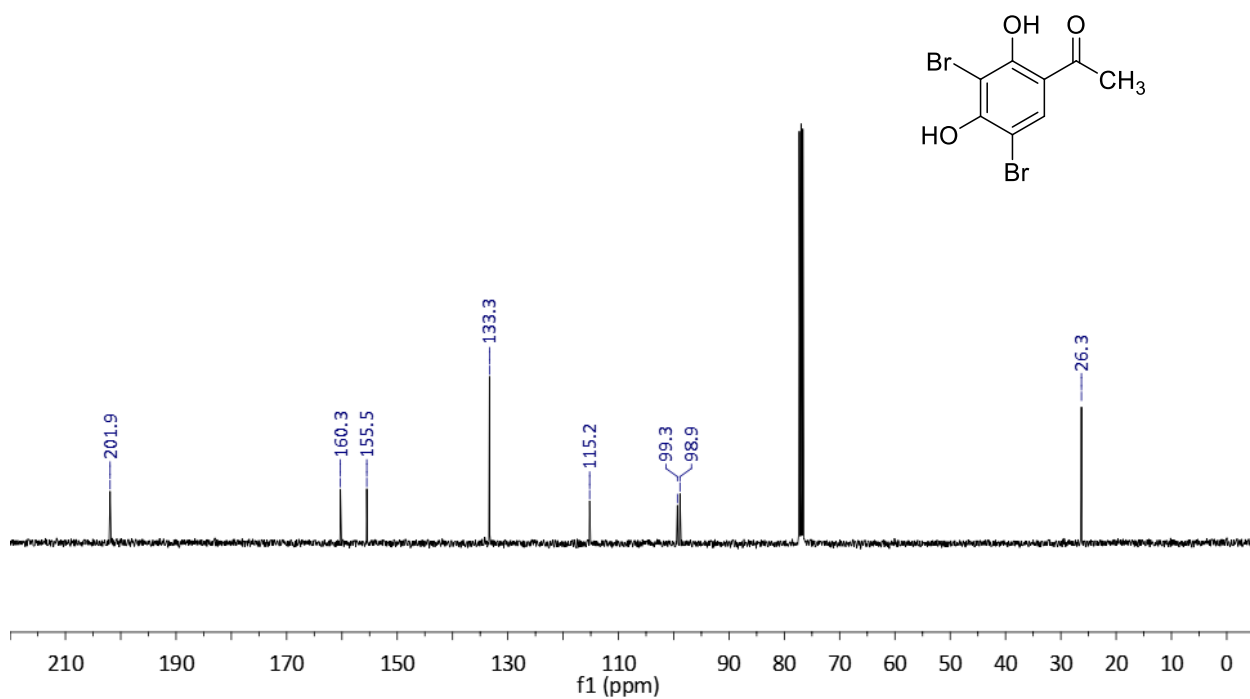

$^{13}\text{C-NMR}$  of 11a in  $\text{CDCl}_3$

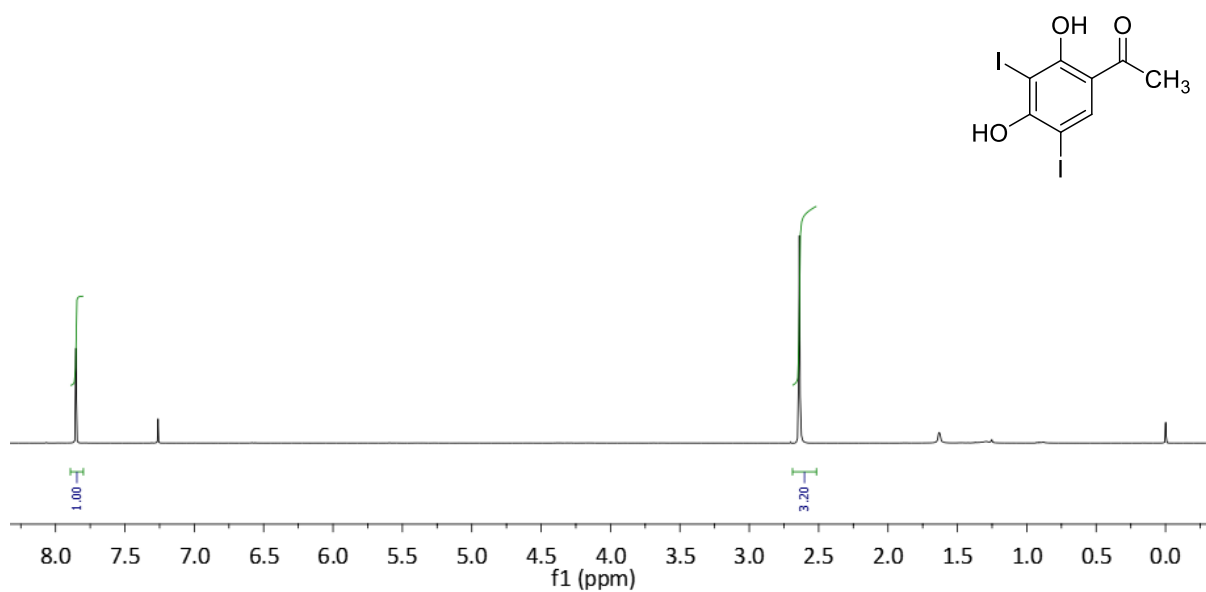

$^1\text{H-NMR}$  of 11b in  $\text{CDCl}_3$

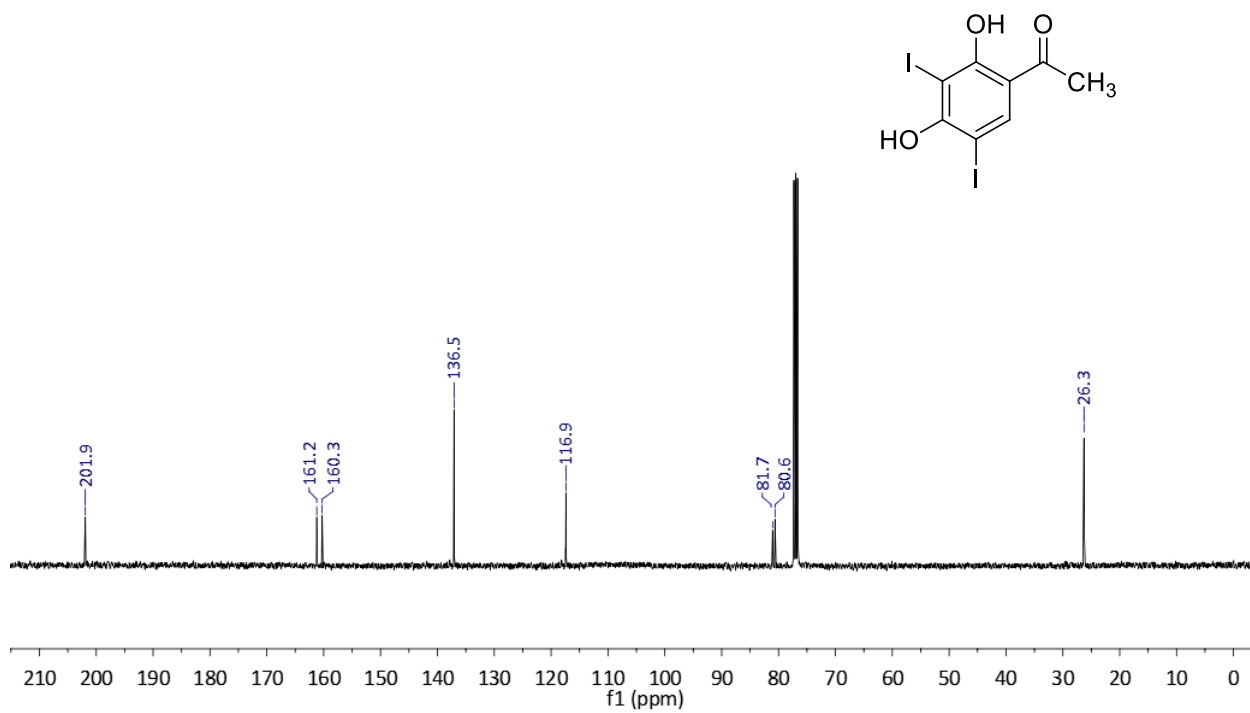

$^{13}\text{C-NMR}$  of 11b in  $\text{CDCl}_3$

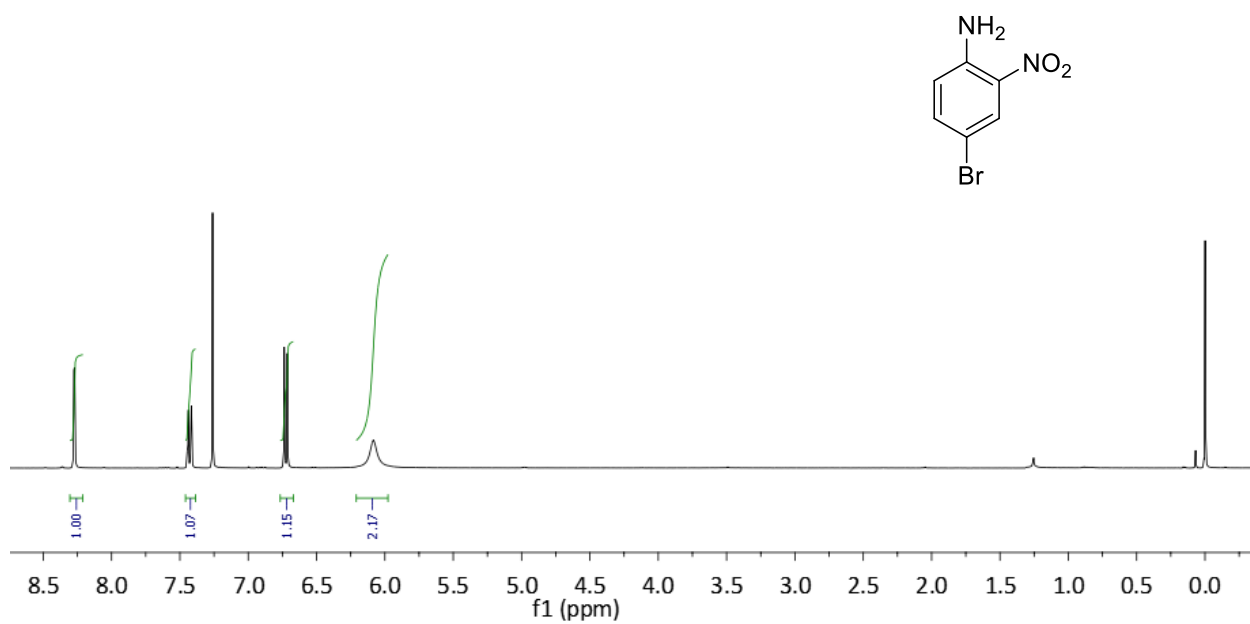

$^1\text{H-NMR}$  of 12a in  $\text{CDCl}_3$

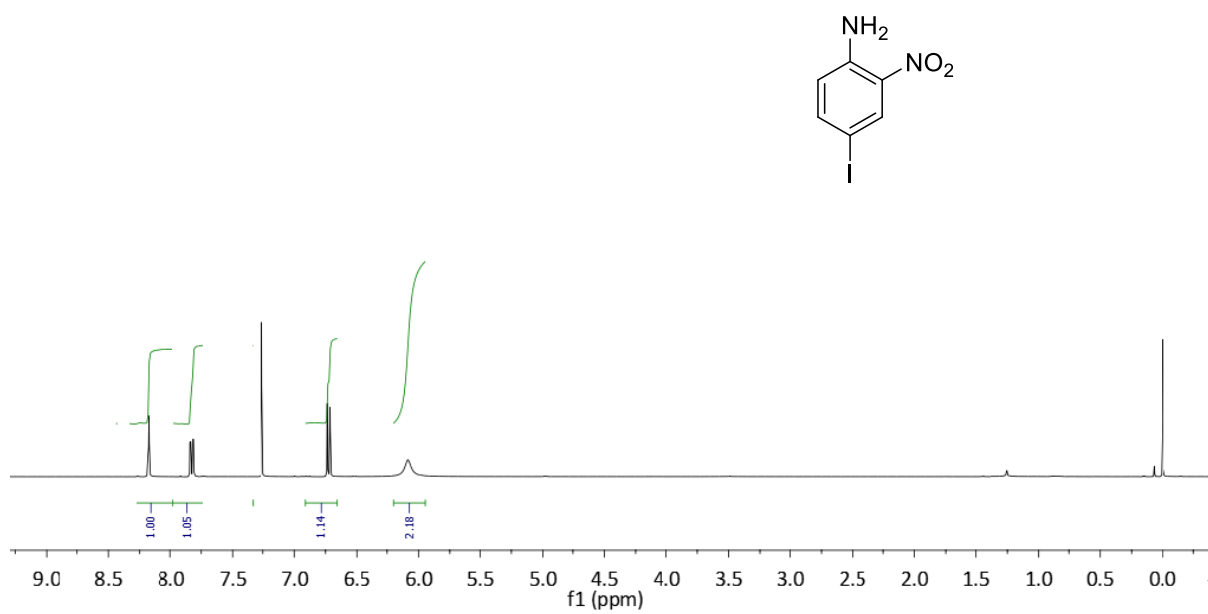

$^1\text{H-NMR}$  of 12b in  $\text{CDCl}_3$

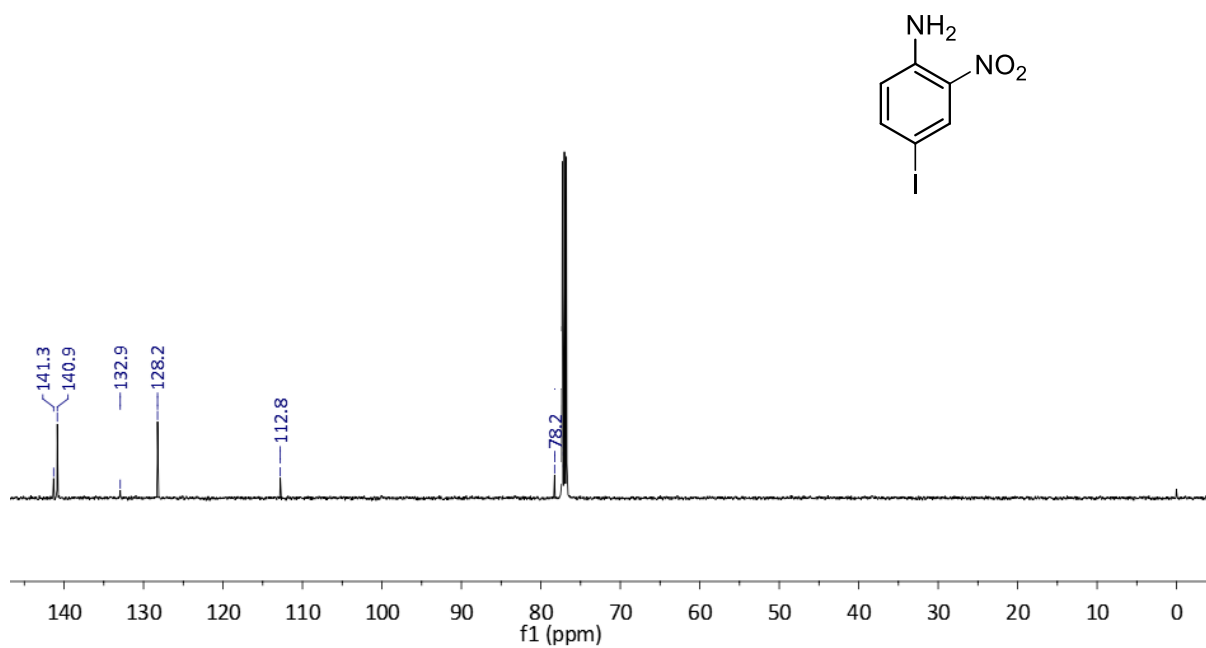

<sup>13</sup>C NMR of 12b in CDCl<sub>3</sub>

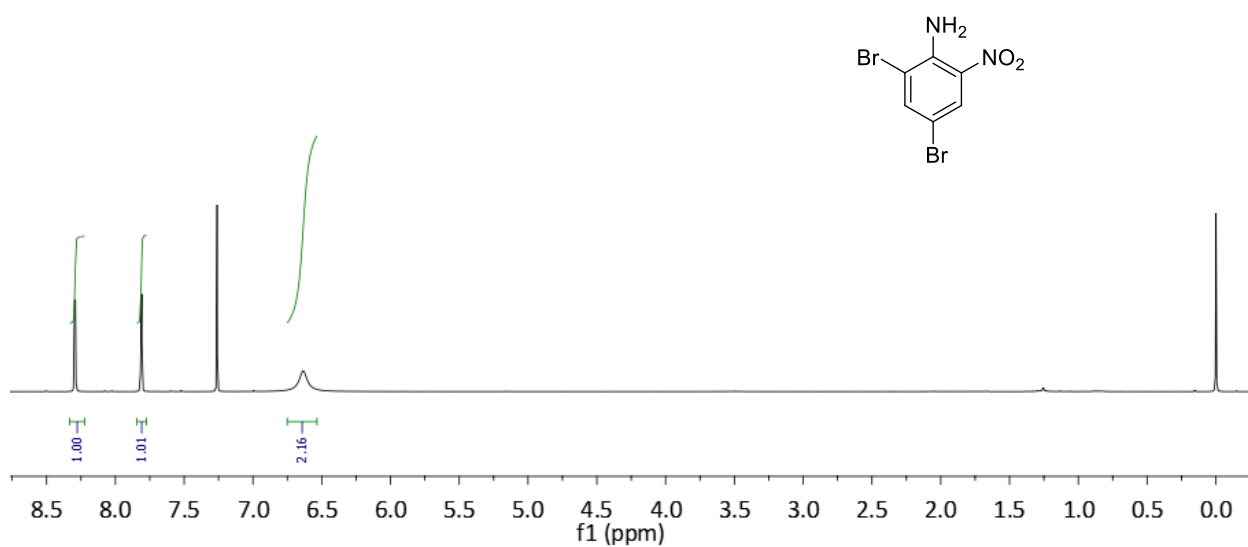

<sup>1</sup>H-NMR of 12c in CDCl<sub>3</sub>

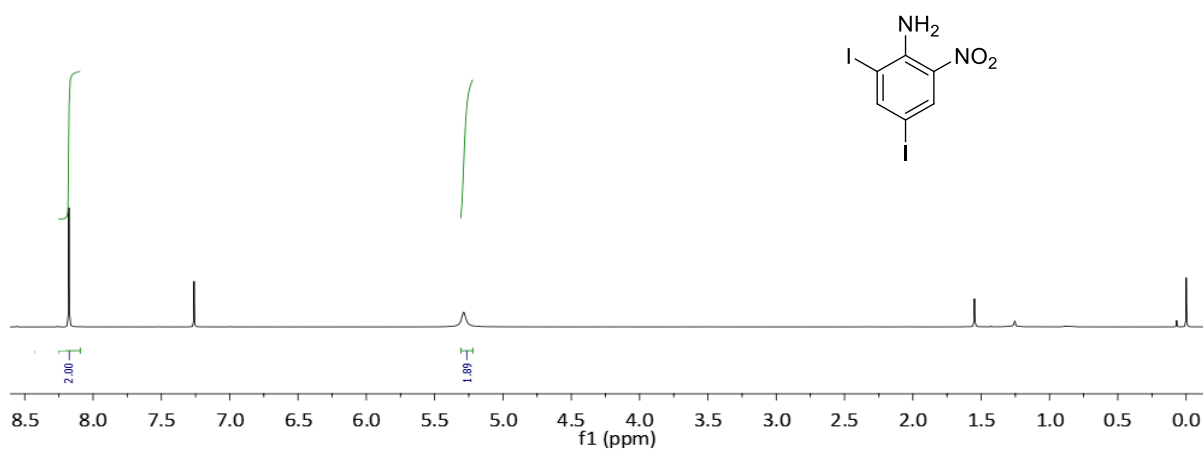

$^1\text{H-NMR}$  of 12d in  $\text{CDCl}_3$

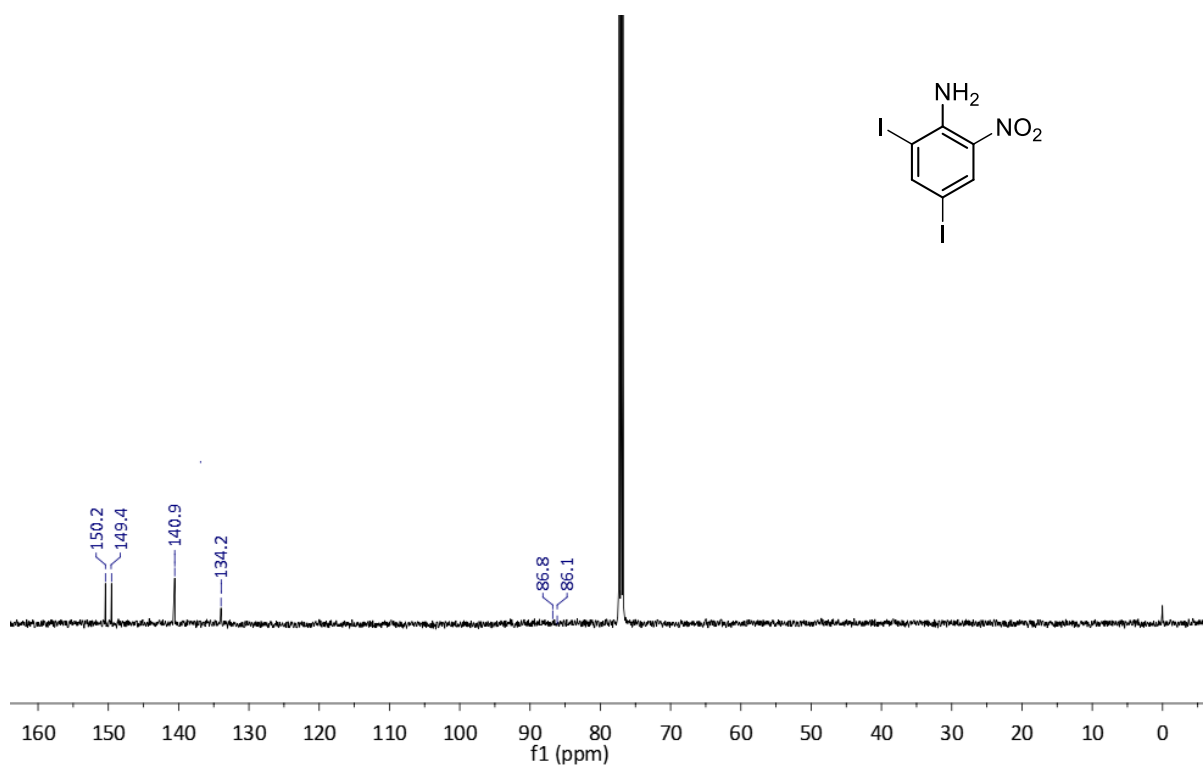

$^{13}\text{C-NMR}$  of 12d in  $\text{CDCl}_3$



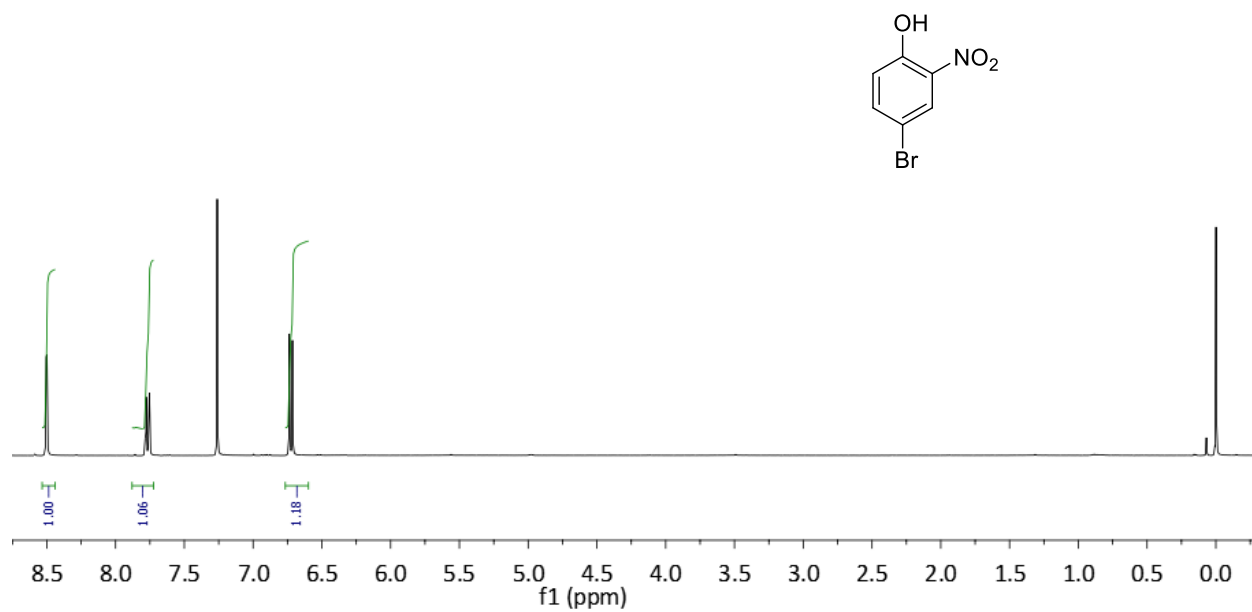

$^1\text{H-NMR}$  of 13a in  $\text{CDCl}_3$

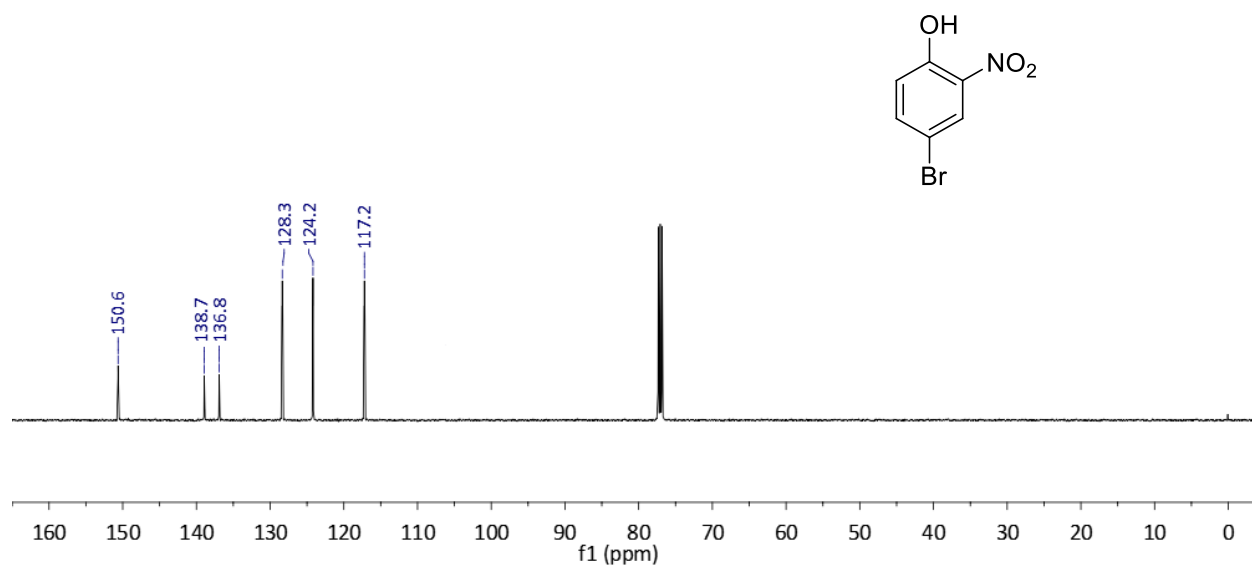

$^{13}\text{C-NMR}$  of 13a in  $\text{CDCl}_3$

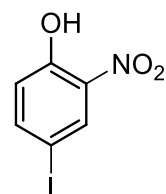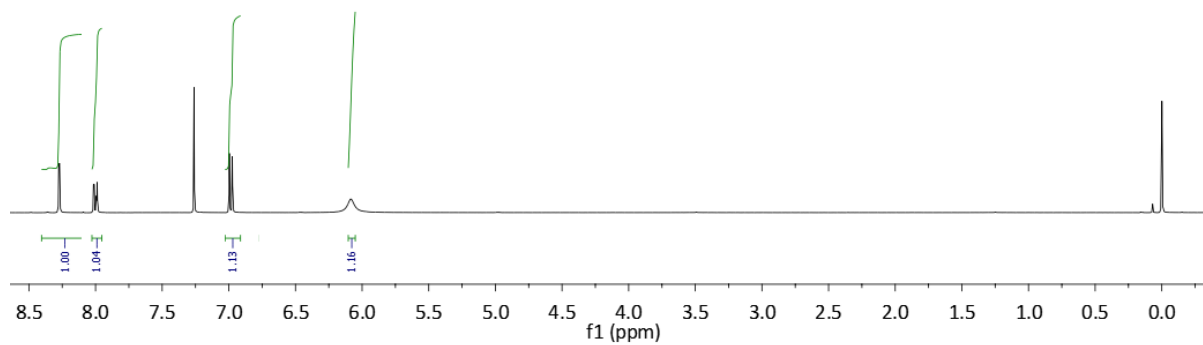

$^1\text{H}$ -NMR of 13b in  $\text{CDCl}_3$

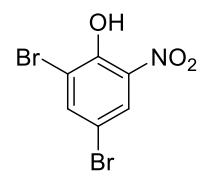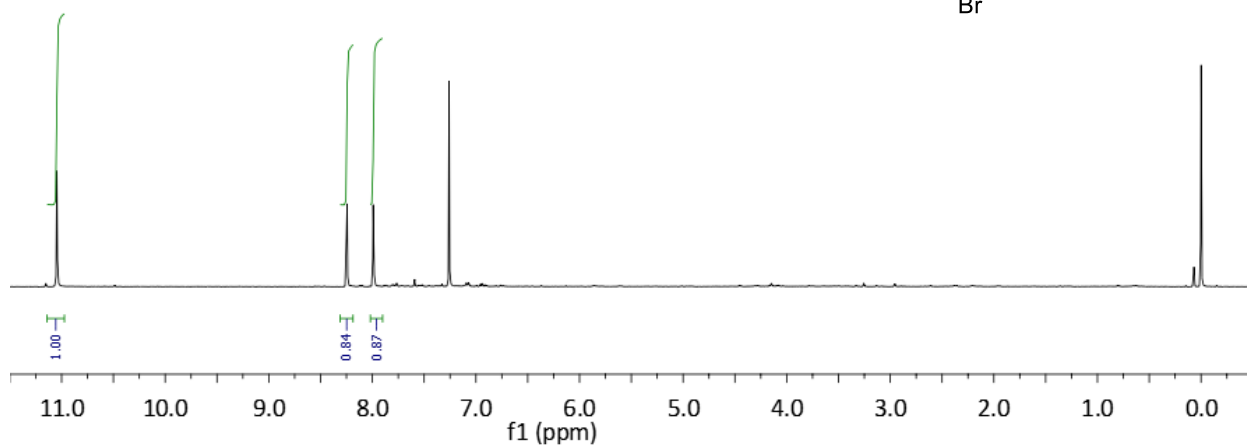

$^1\text{H}$ -NMR of 13c in  $\text{CDCl}_3$

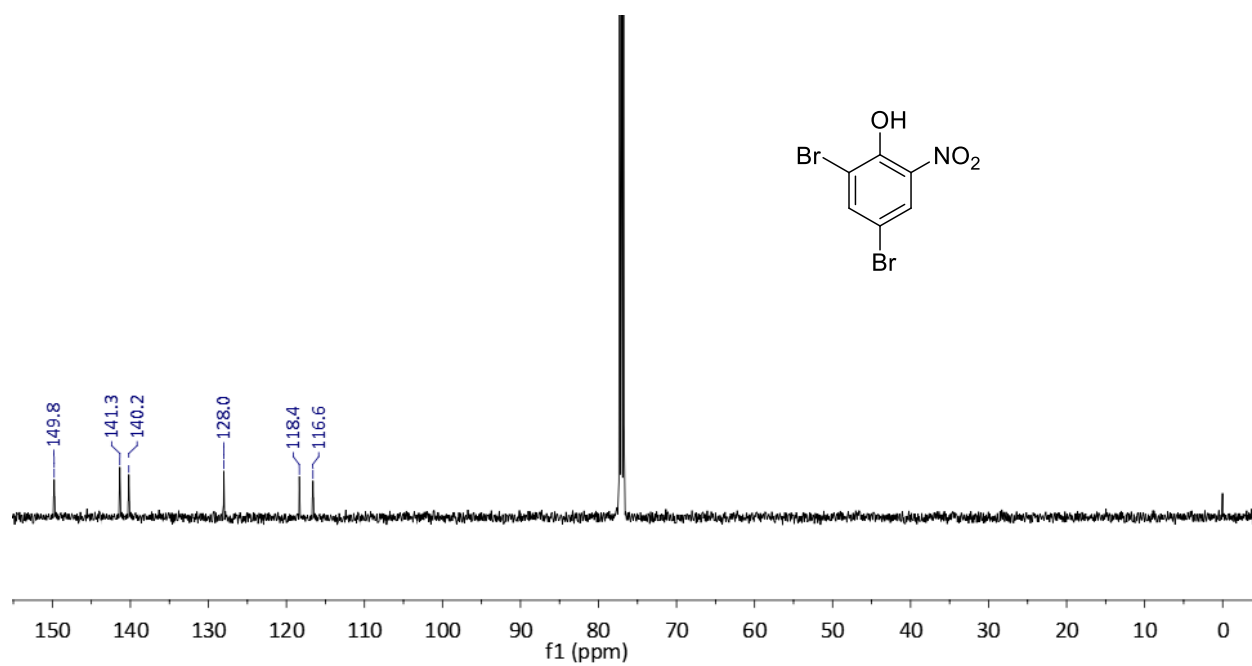

<sup>13</sup>C NMR of 13c in CDCl<sub>3</sub>

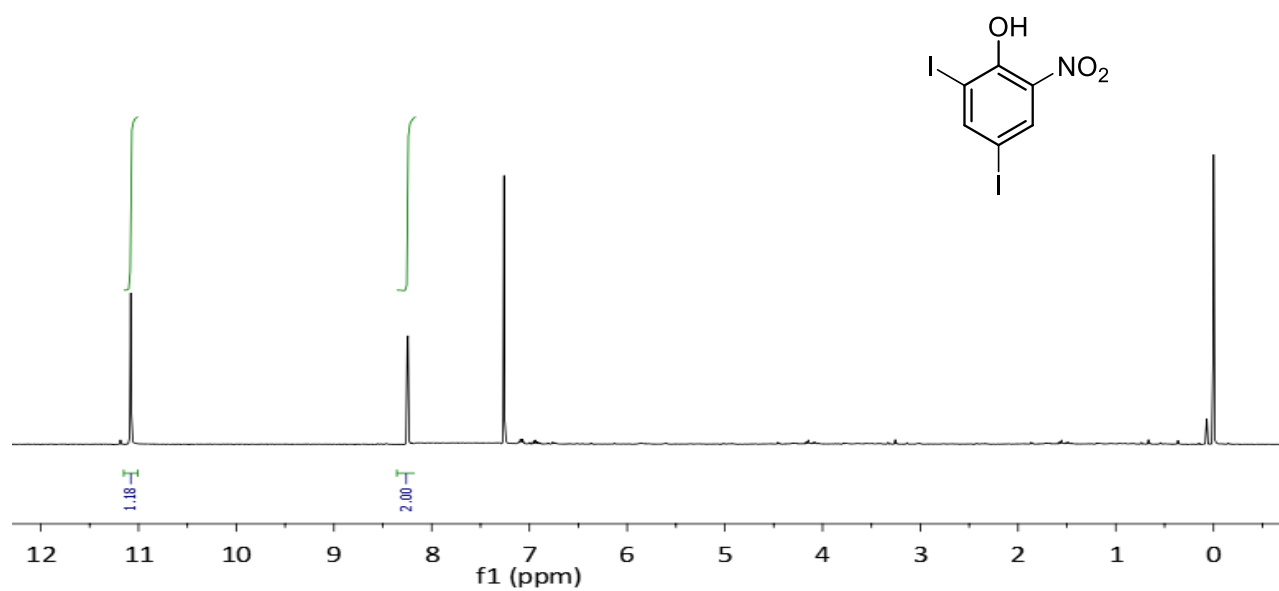

<sup>1</sup>H-NMR of 13d in CDCl<sub>3</sub>

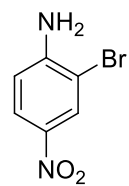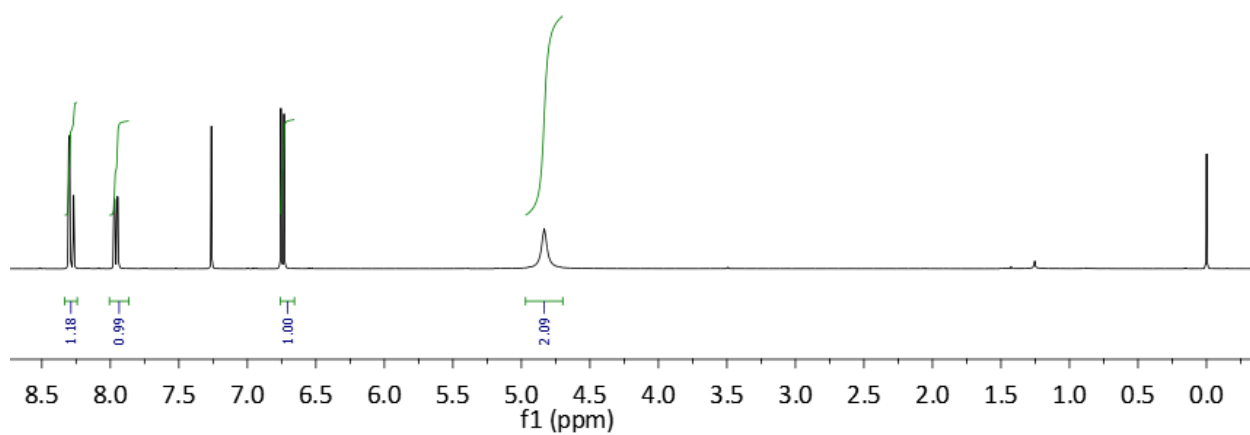

$^1\text{H-NMR}$  of 14a in  $\text{CDCl}_3$

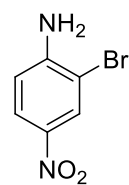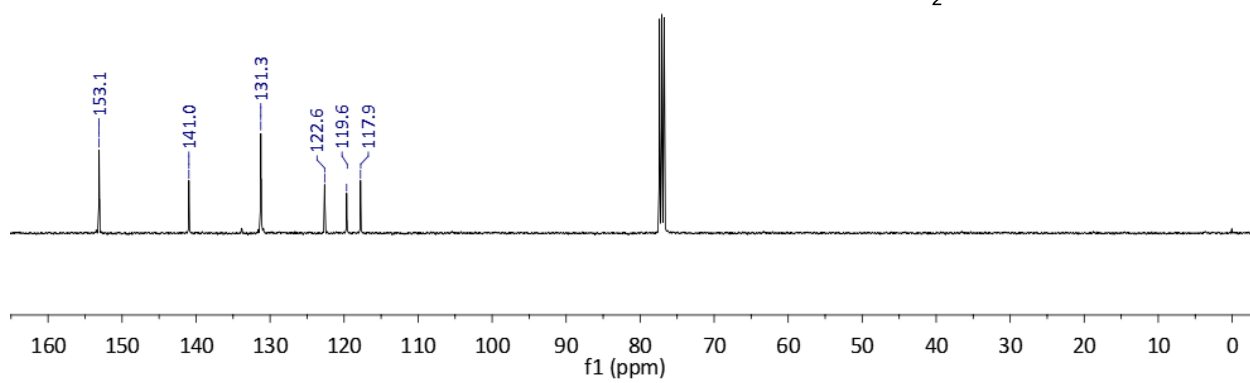

$^{13}\text{C-NMR}$  of 14a in  $\text{CDCl}_3$

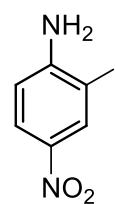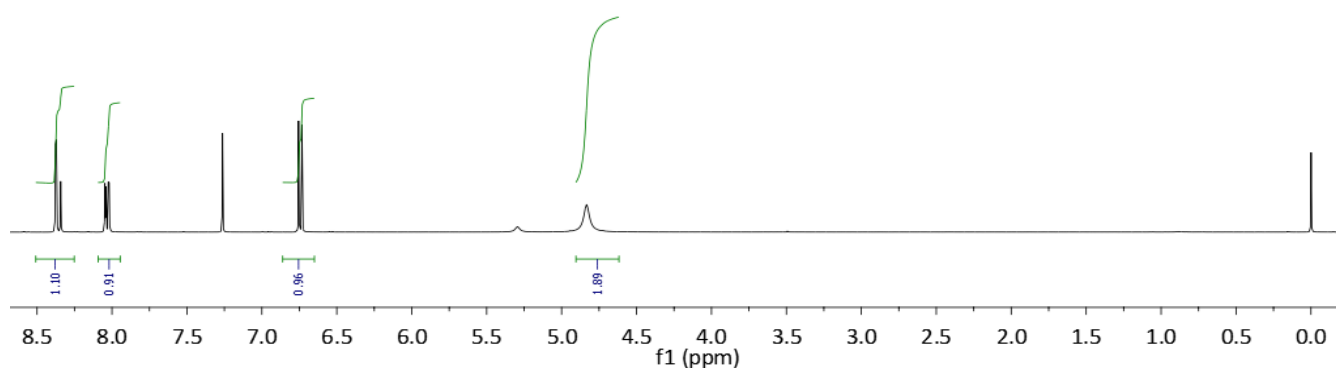

$^1\text{H-NMR}$  of 14b in  $\text{CDCl}_3$

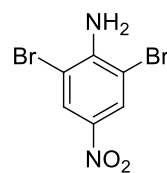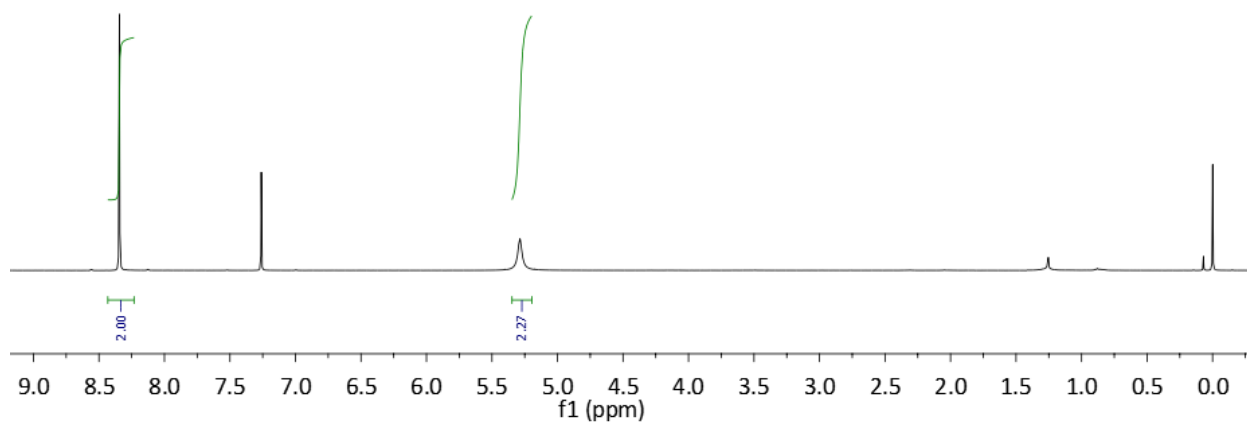

$^1\text{H-NMR}$  of 14c in  $\text{CDCl}_3$

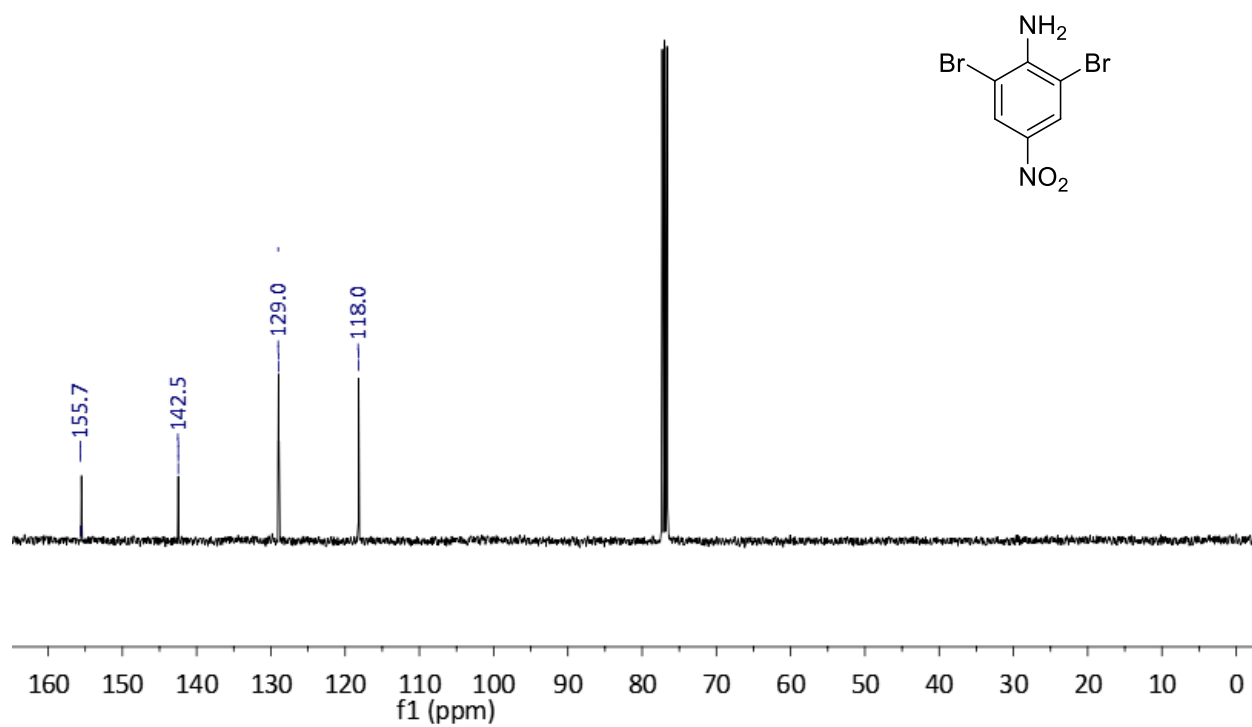

<sup>13</sup>C NMR of 14c in CDCl<sub>3</sub>

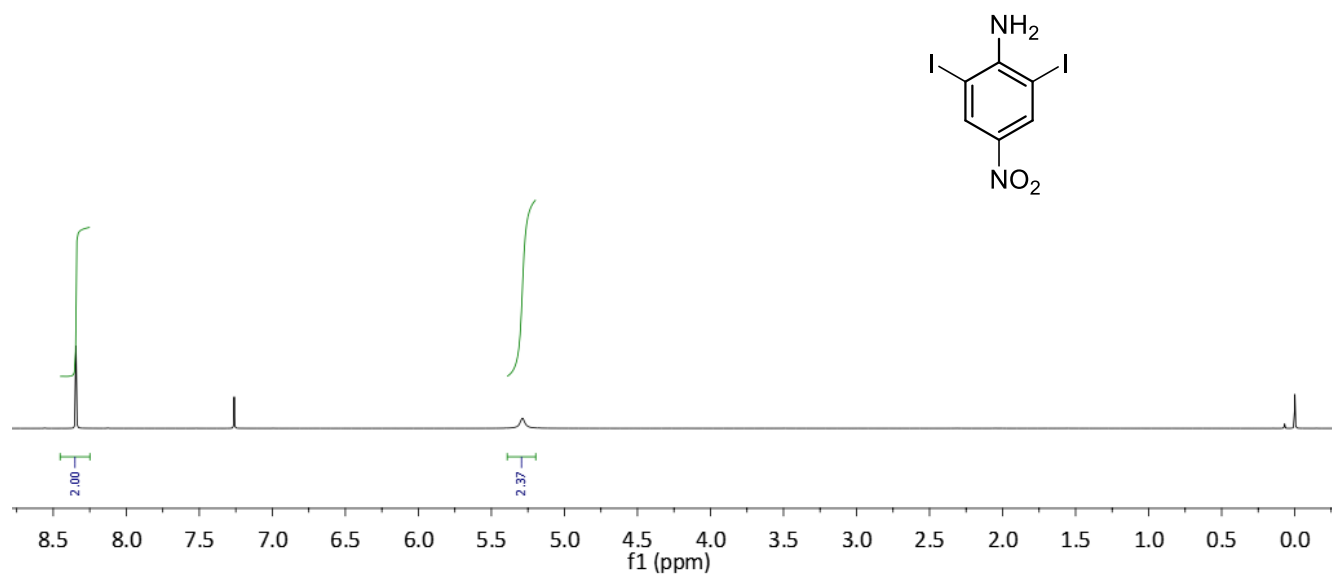

<sup>1</sup>H-NMR of 14d in CDCl<sub>3</sub>

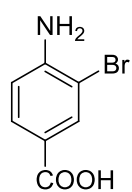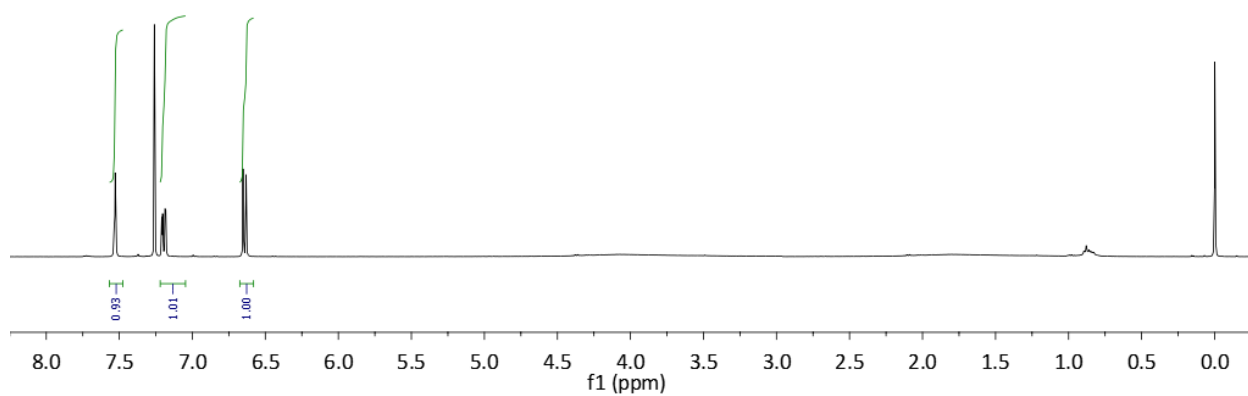

$^1\text{H-NMR}$  of 15a in  $\text{CDCl}_3$

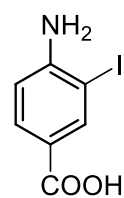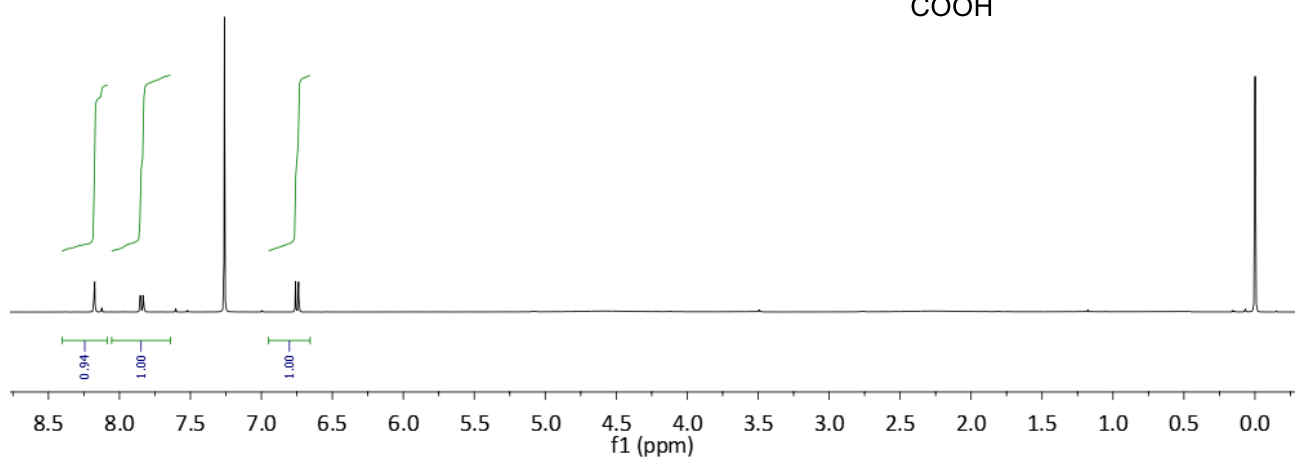

$^1\text{H-NMR}$  of 15b in  $\text{CDCl}_3$

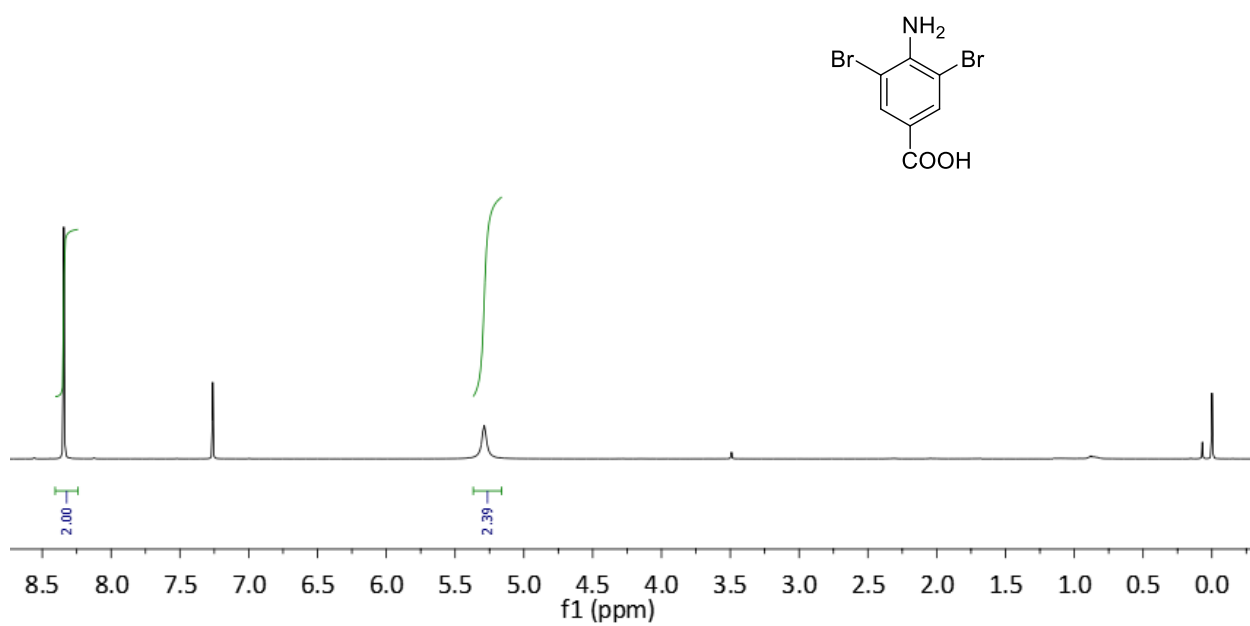

$^1\text{H-NMR}$  of 15c in  $\text{CDCl}_3$

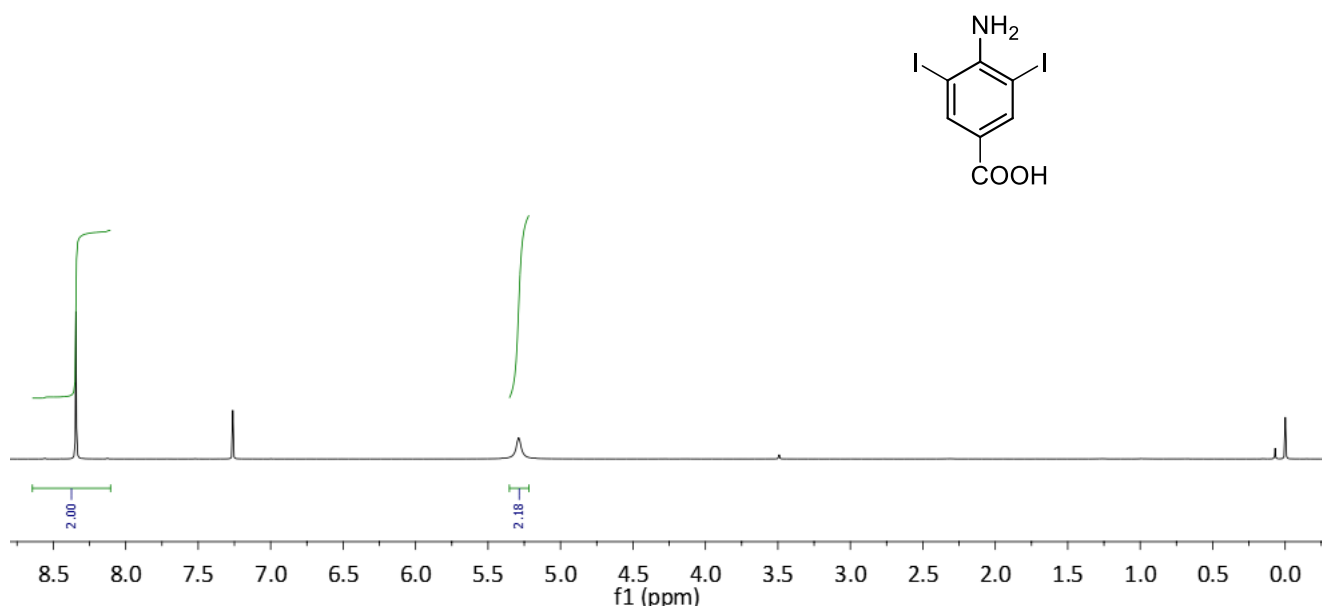

$^1\text{H-NMR}$  of 15d in  $\text{CDCl}_3$



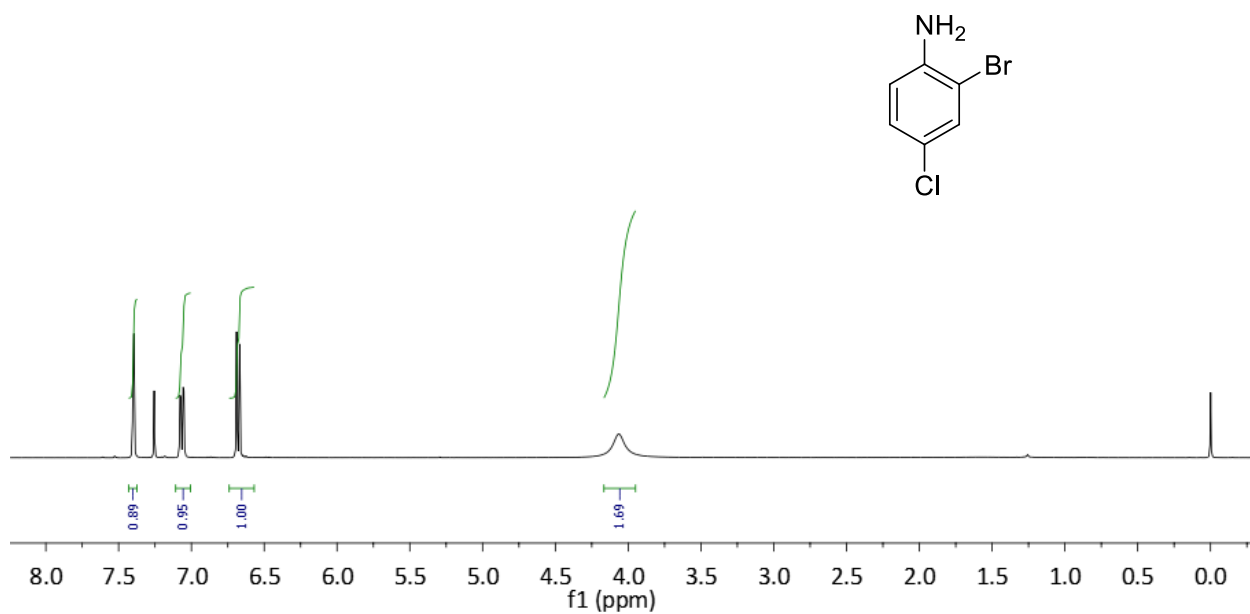

$^1\text{H}$ -NMR of 16a in  $\text{CDCl}_3$

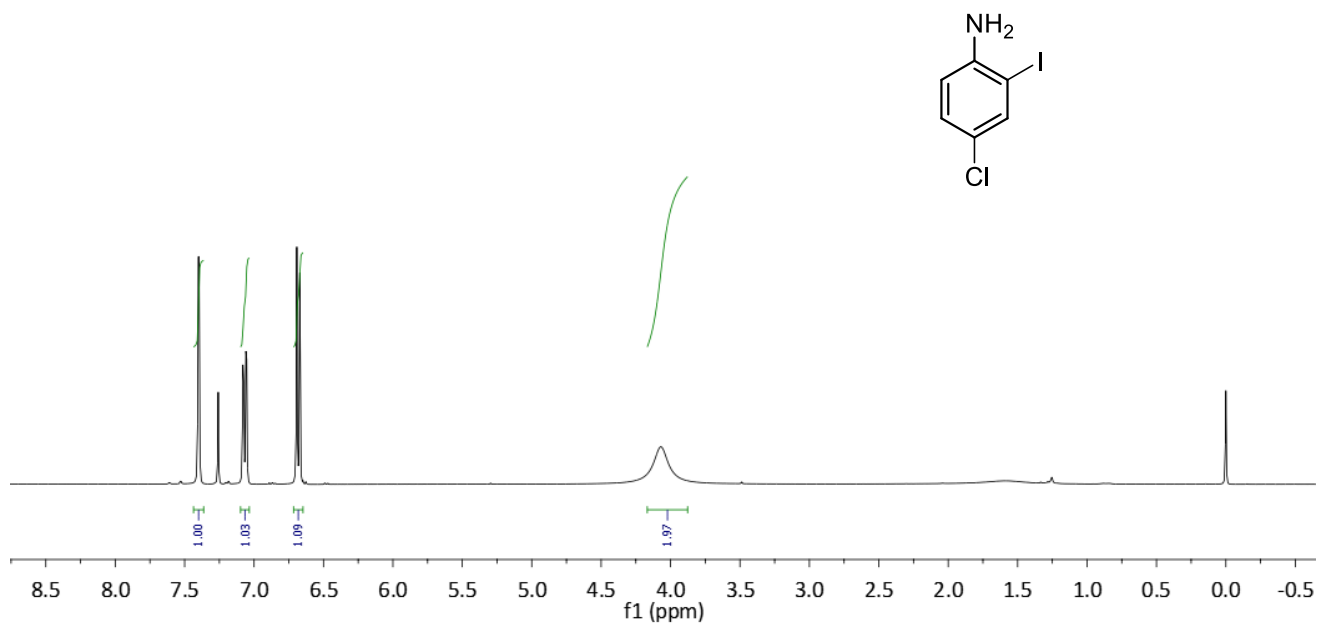

$^1\text{H}$ -NMR of 16b in  $\text{CDCl}_3$

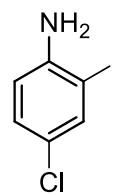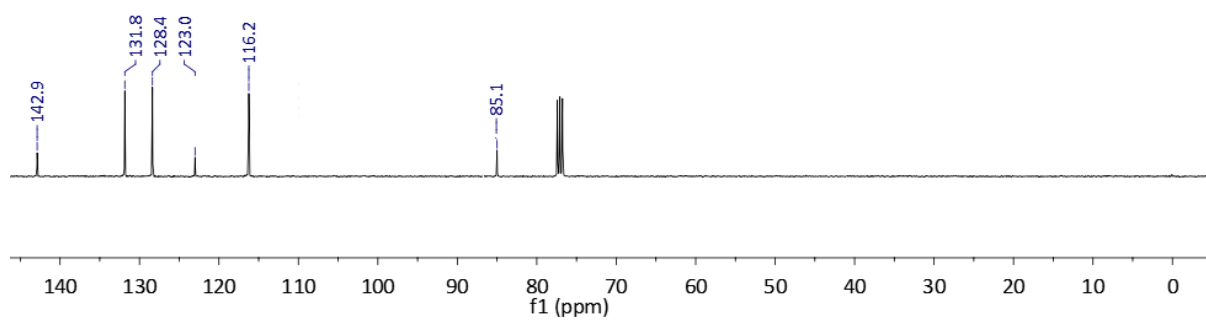

$^{13}\text{C}$  NMR of 16b in  $\text{CDCl}_3$

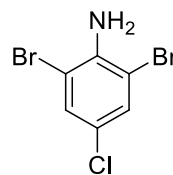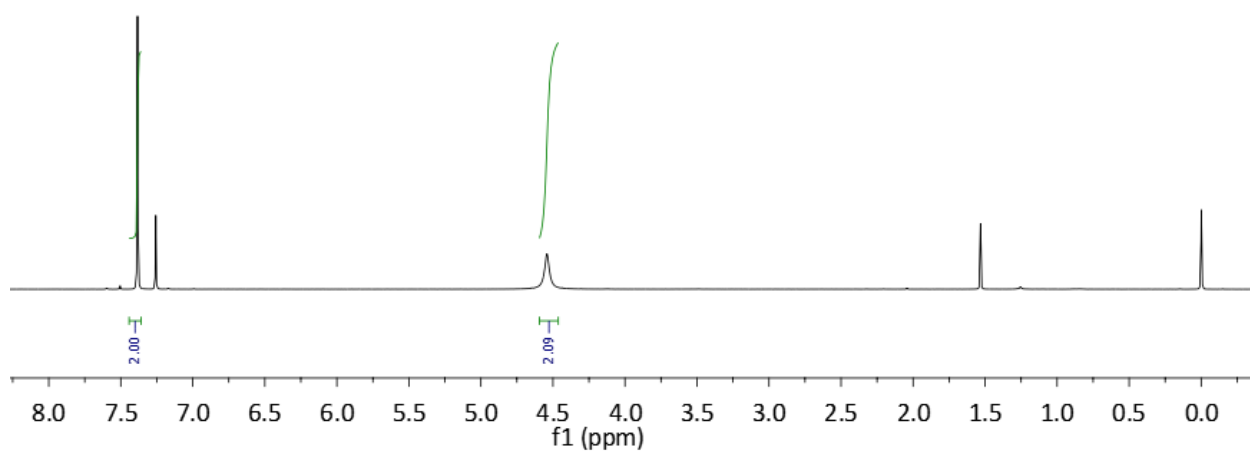

$^1\text{H}$ -NMR of 16c in  $\text{CDCl}_3$

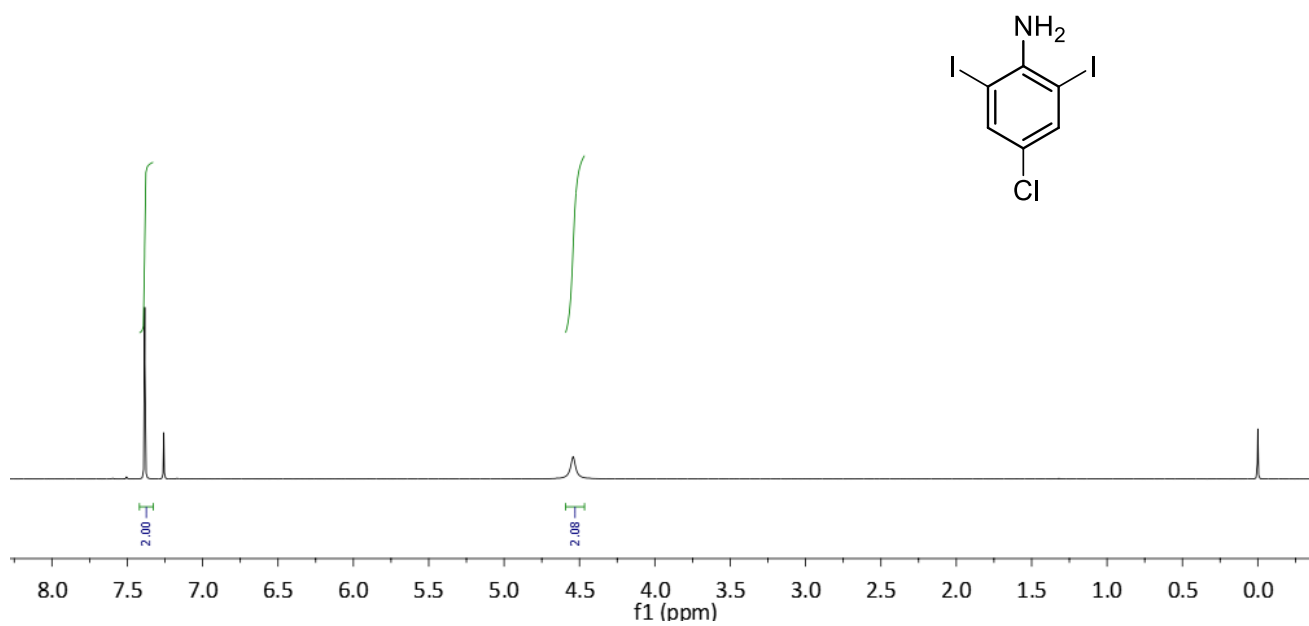

$^1\text{H-NMR}$  of 16d in  $\text{CDCl}_3$

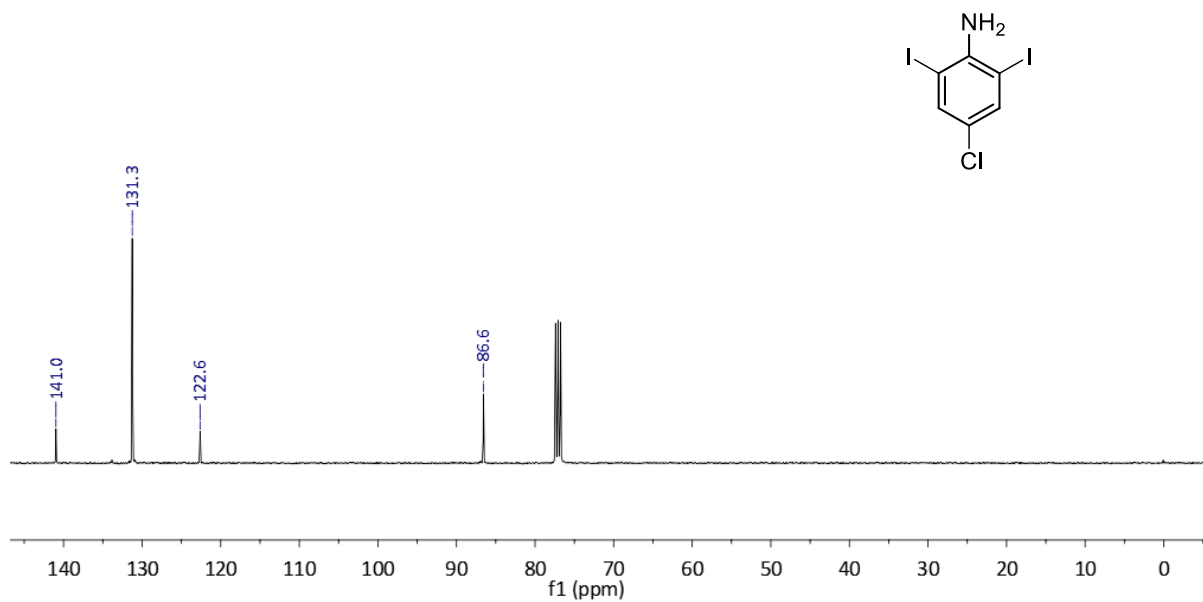

$^{13}\text{C-NMR}$  of 16d in  $\text{CDCl}_3$

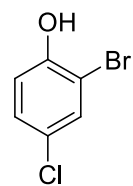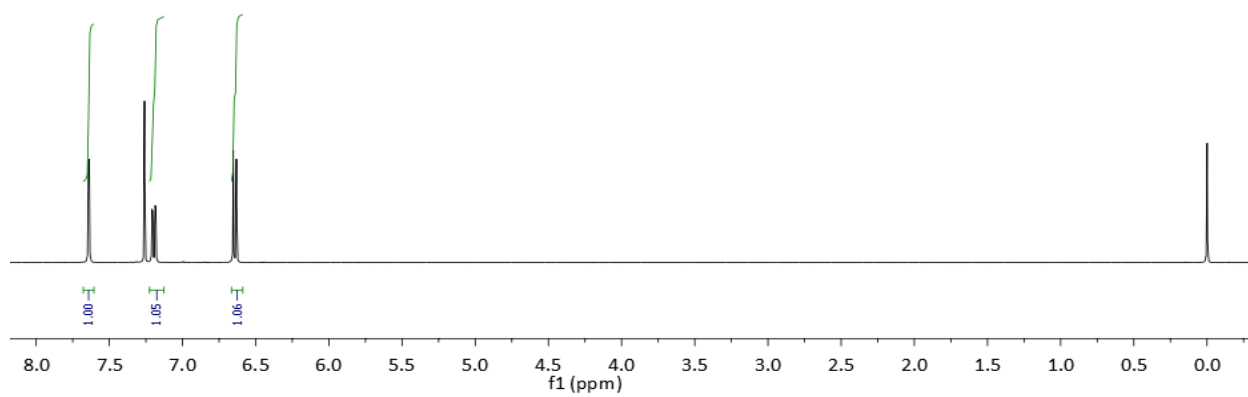

$^1\text{H}$ -NMR of 17a in  $\text{CDCl}_3$

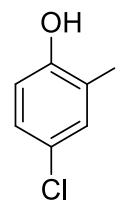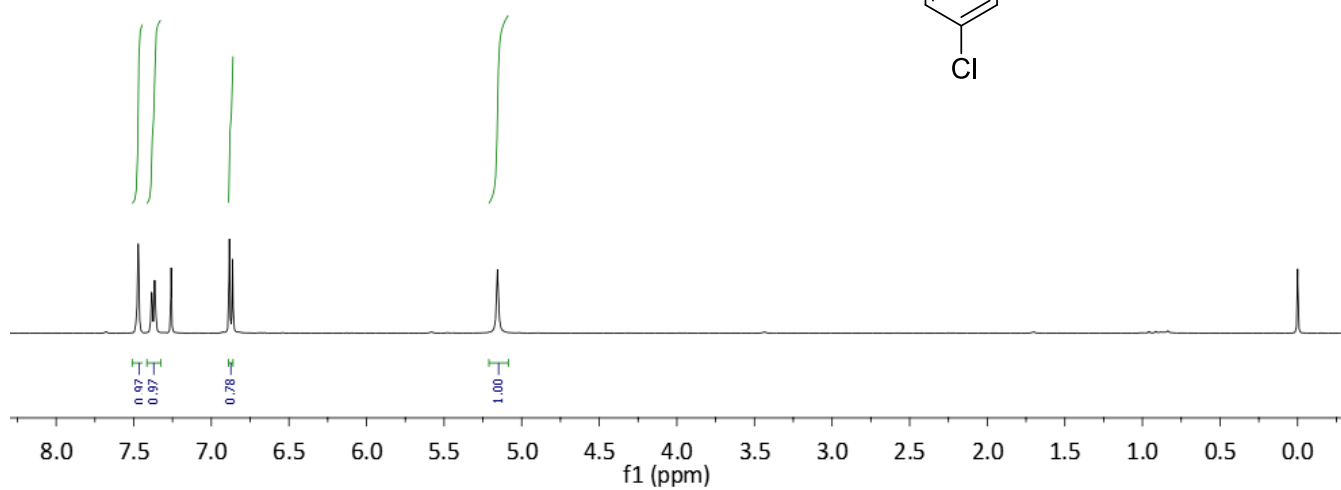

$^1\text{H}$ -NMR of 17b in  $\text{CDCl}_3$

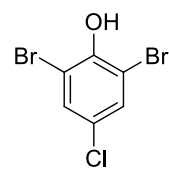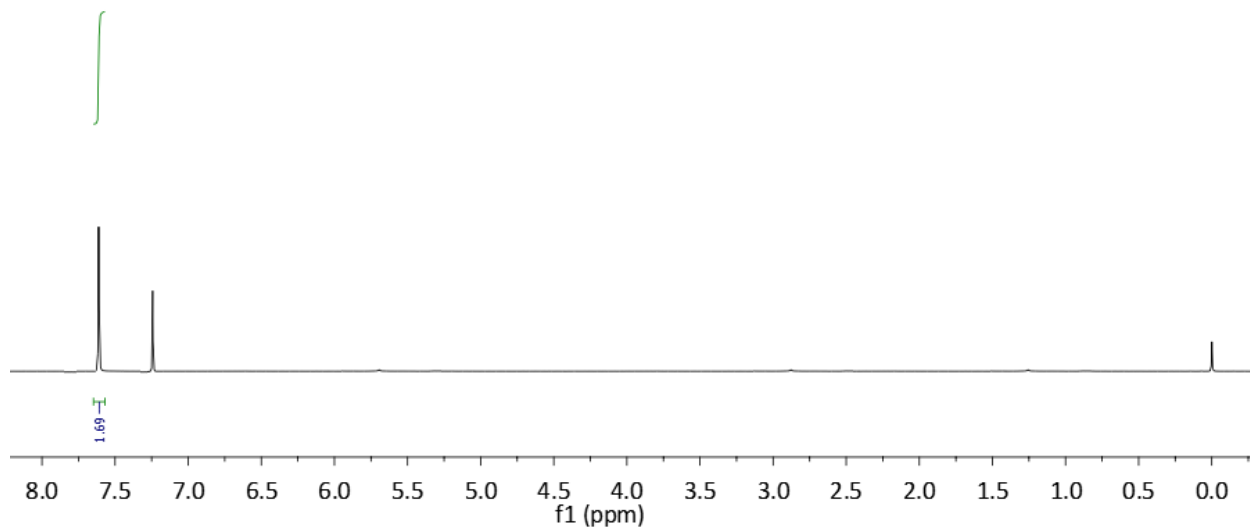

$^1\text{H-NMR}$  of 17c in  $\text{CDCl}_3$

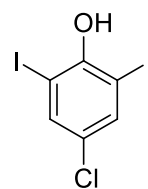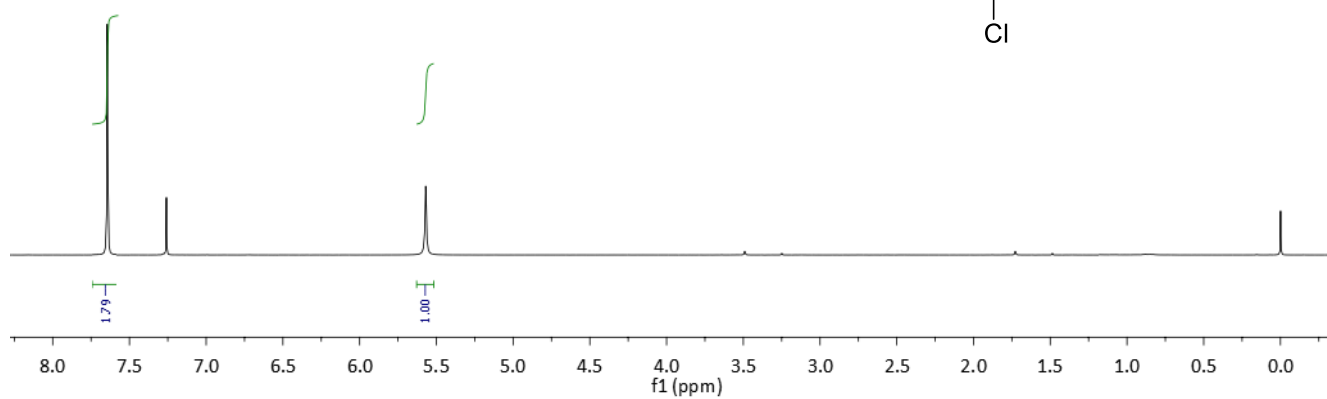

$^1\text{H-NMR}$  of 17d in  $\text{CDCl}_3$

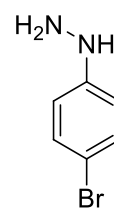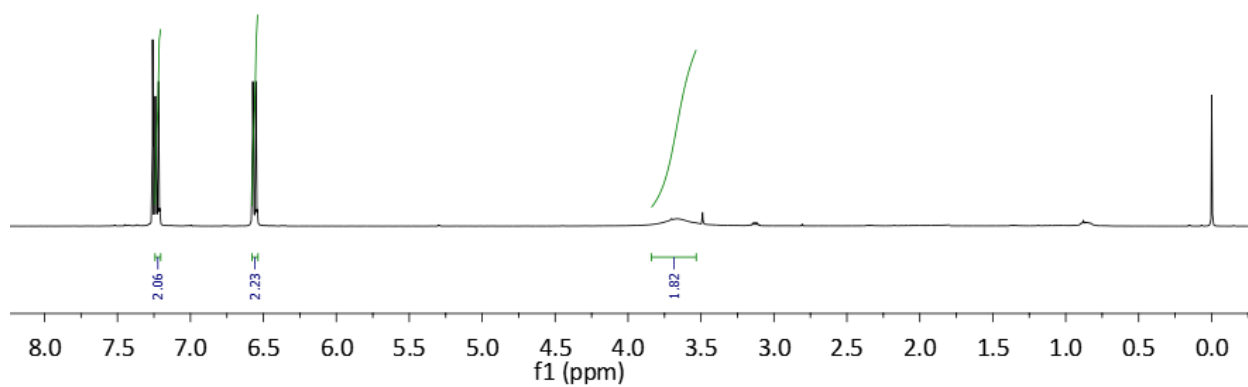

$^1\text{H-NMR}$  of 18a in  $\text{CDCl}_3$

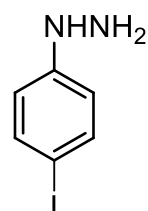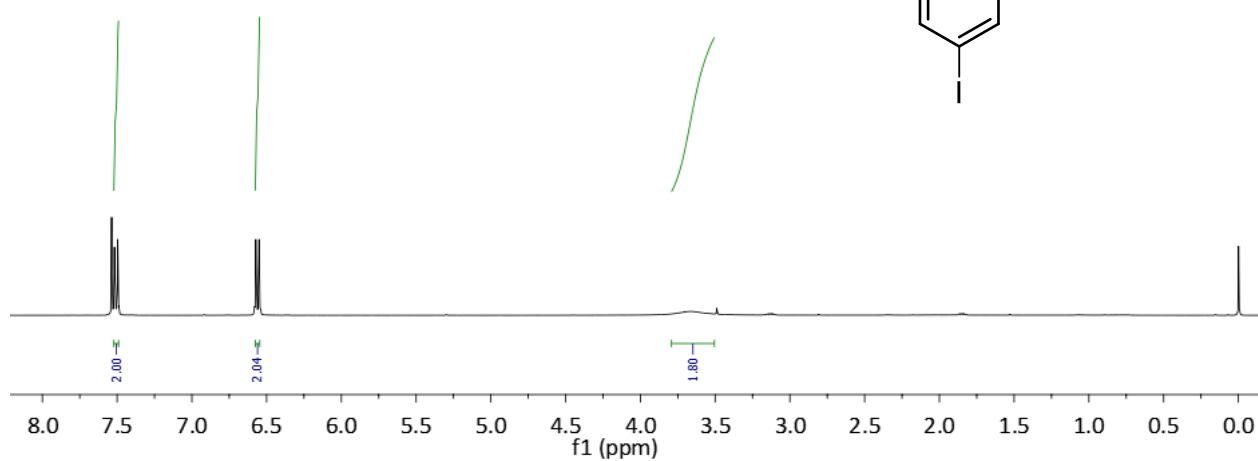

$^1\text{H-NMR}$  of 18b in  $\text{CDCl}_3$

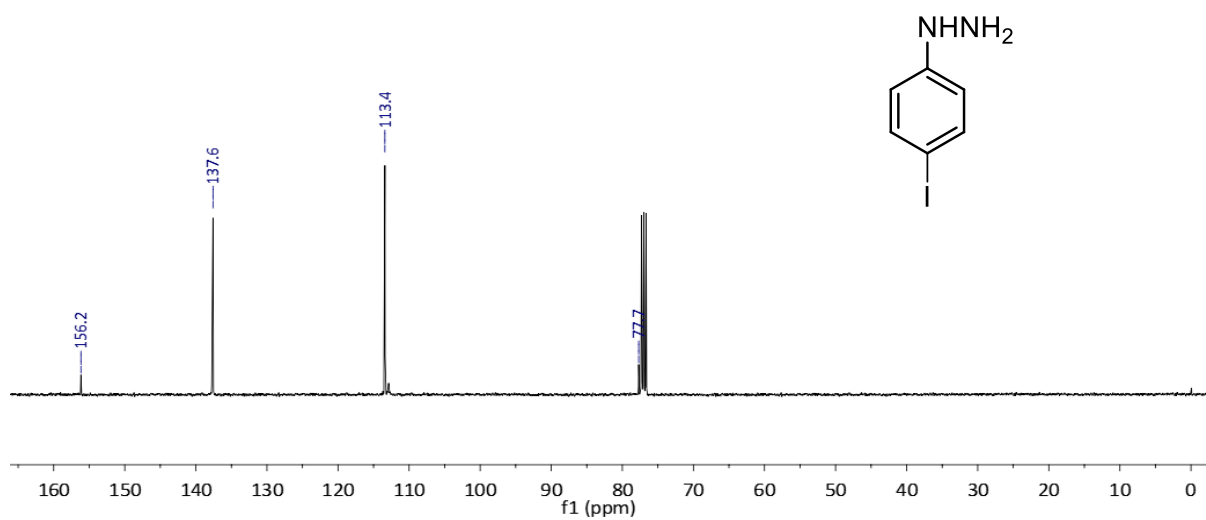

<sup>13</sup>C NMR of 18b in CDCl<sub>3</sub>

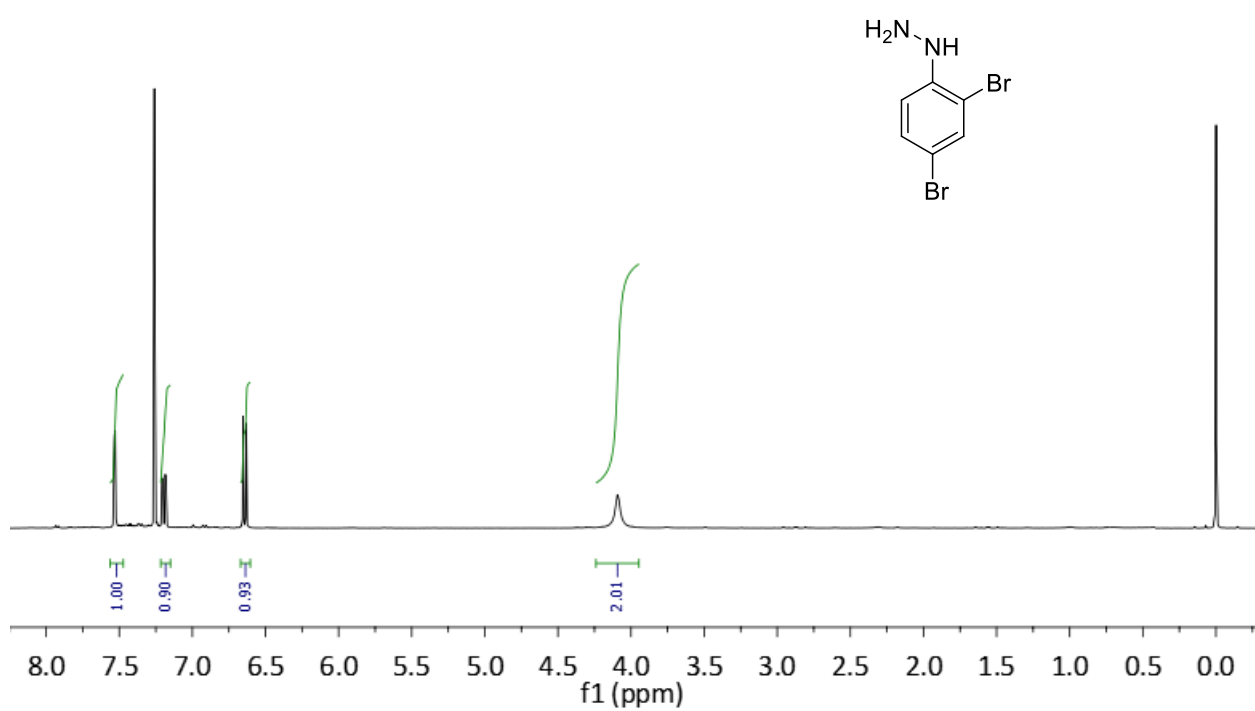

<sup>1</sup>H-NMR of 18c in CDCl<sub>3</sub>

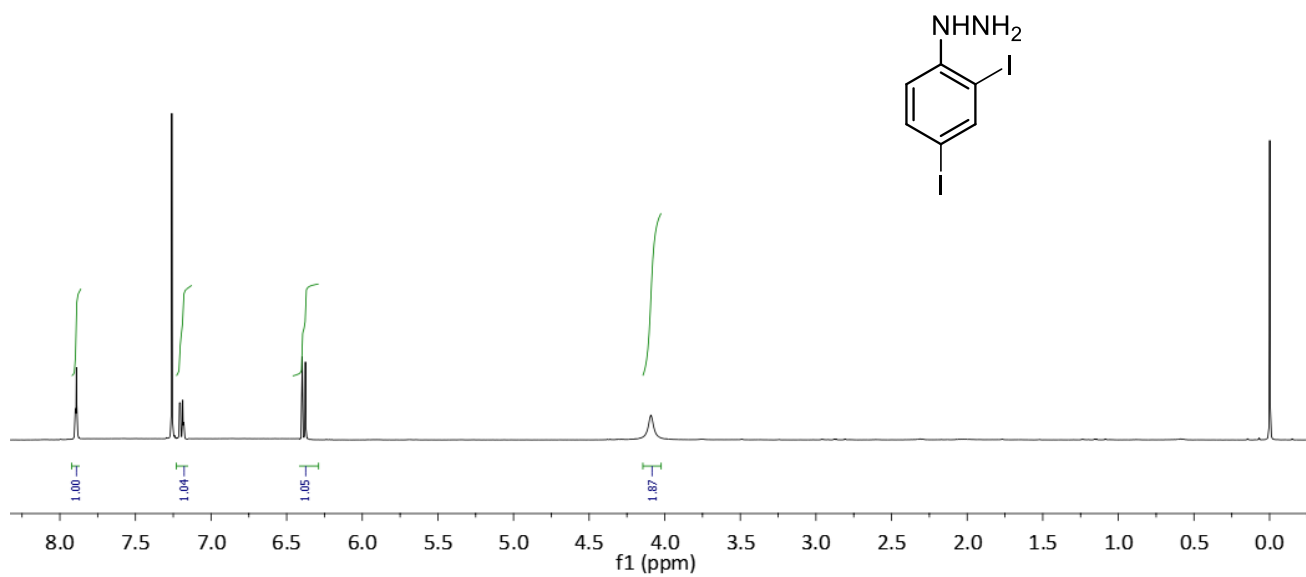

$^1\text{H}$ -NMR of 18d in  $\text{CDCl}_3$

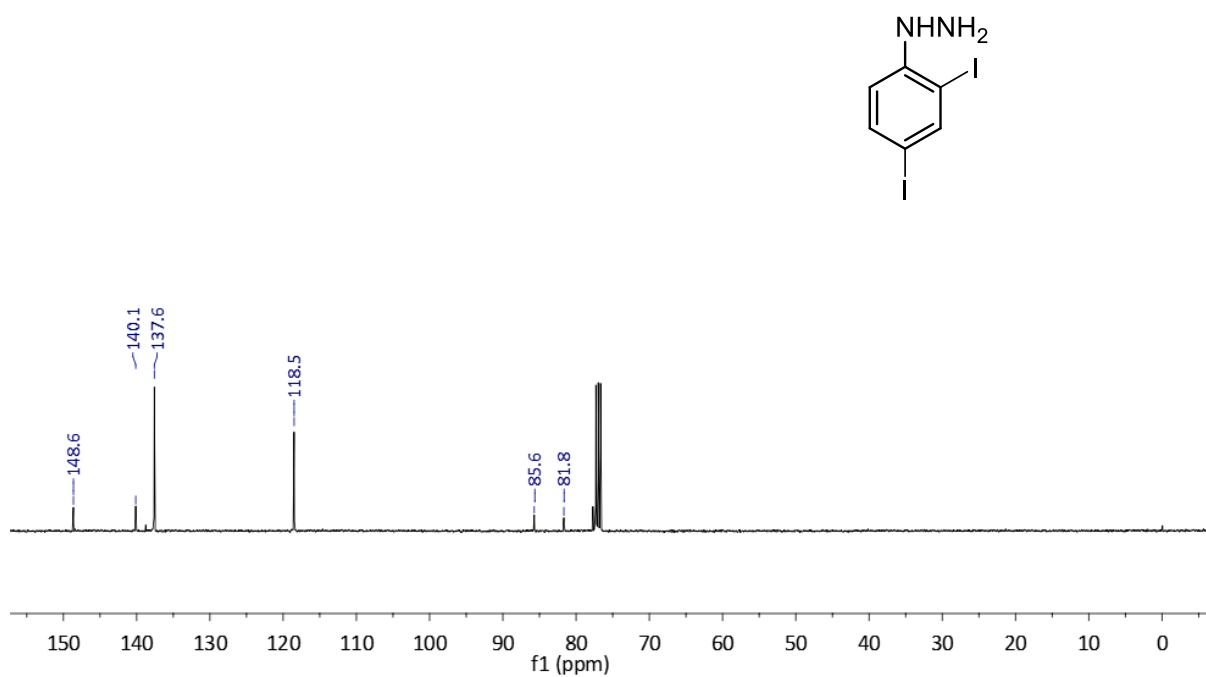

$^{13}\text{C}$  NMR of 18d in  $\text{CDCl}_3$



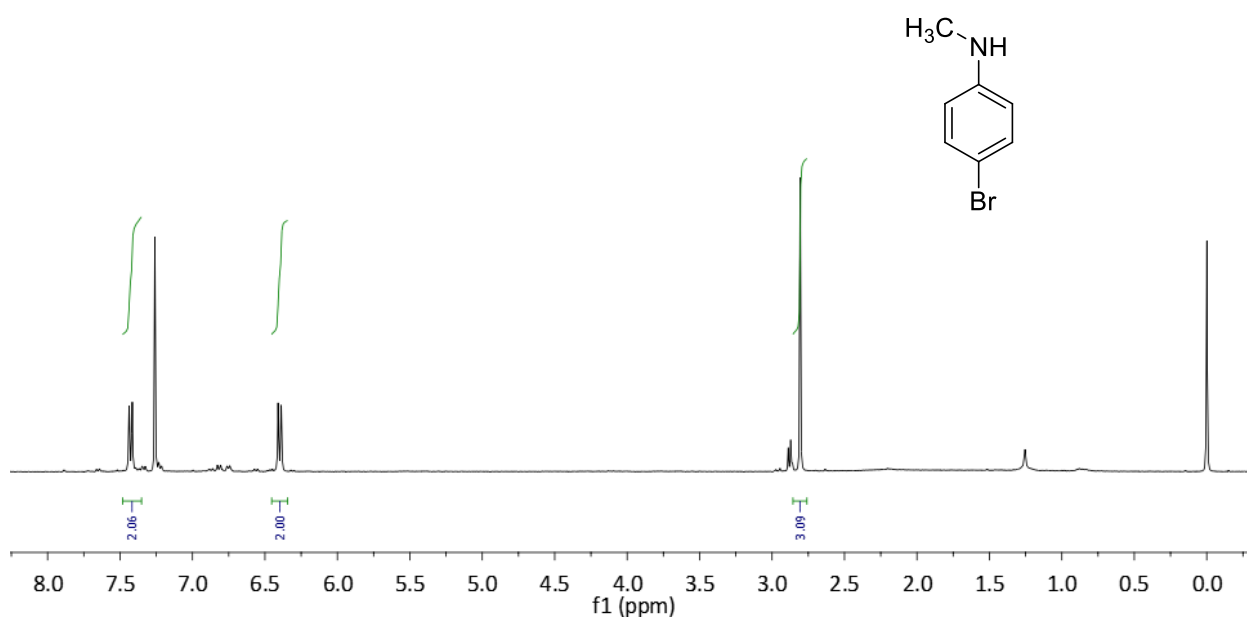

$^1\text{H}$ -NMR of 19a in  $\text{CDCl}_3$

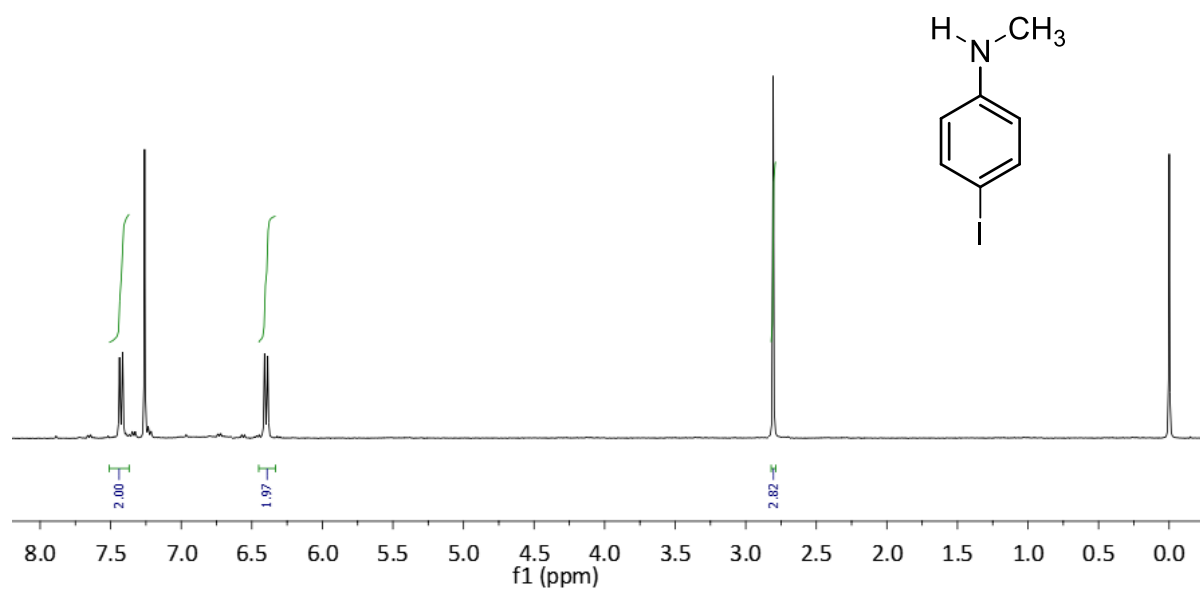

$^1\text{H}$ -NMR of 19b in  $\text{CDCl}_3$

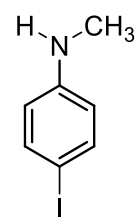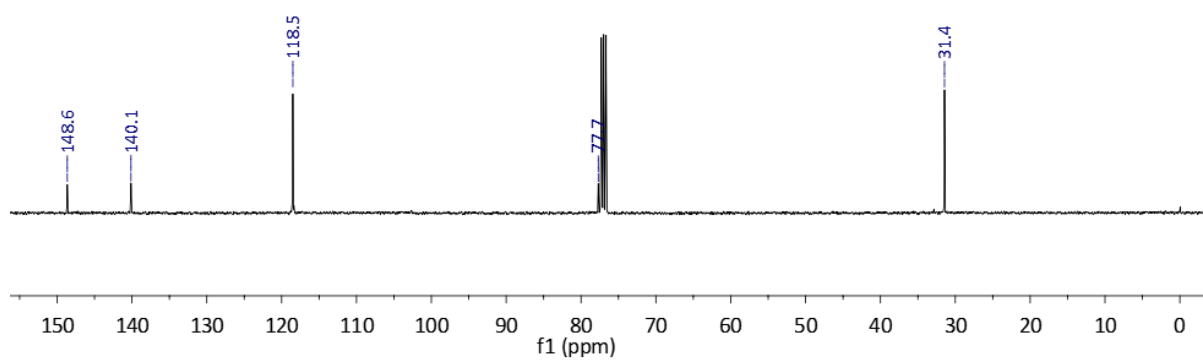

$^{13}\text{C}$  NMR of 19b in  $\text{CDCl}_3$

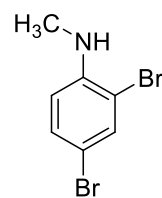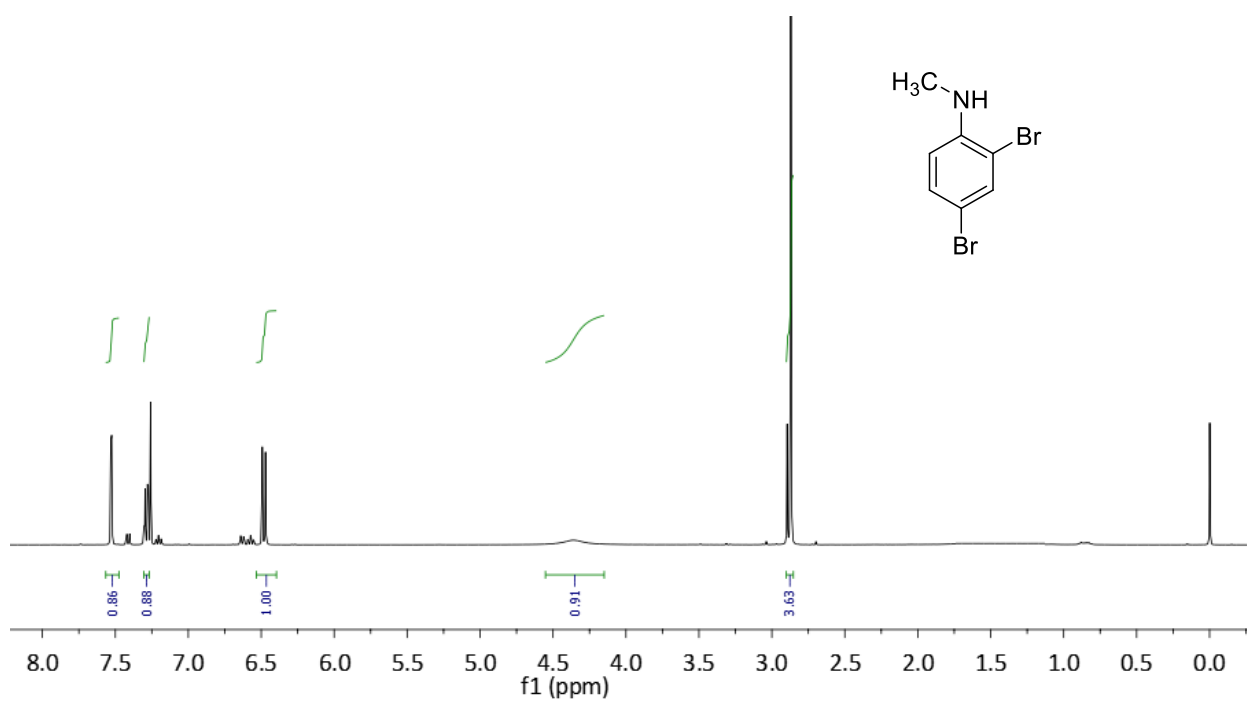

$^1\text{H}$ -NMR of 19c in  $\text{CDCl}_3$

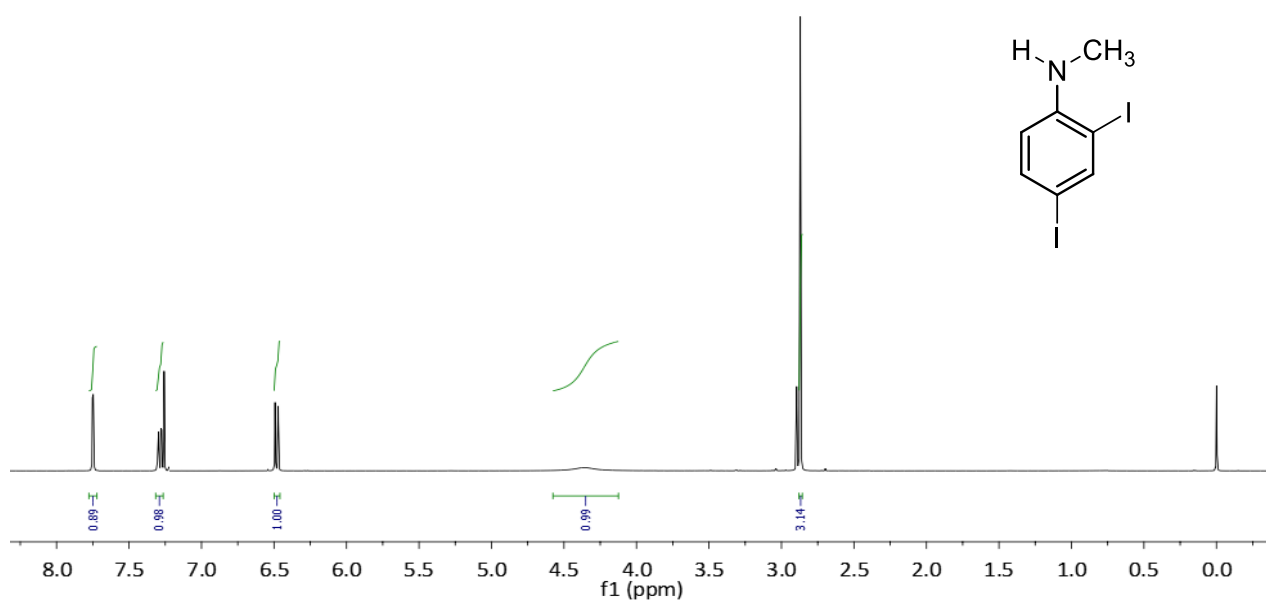

<sup>1</sup>H-NMR of 19d in CDCl<sub>3</sub>

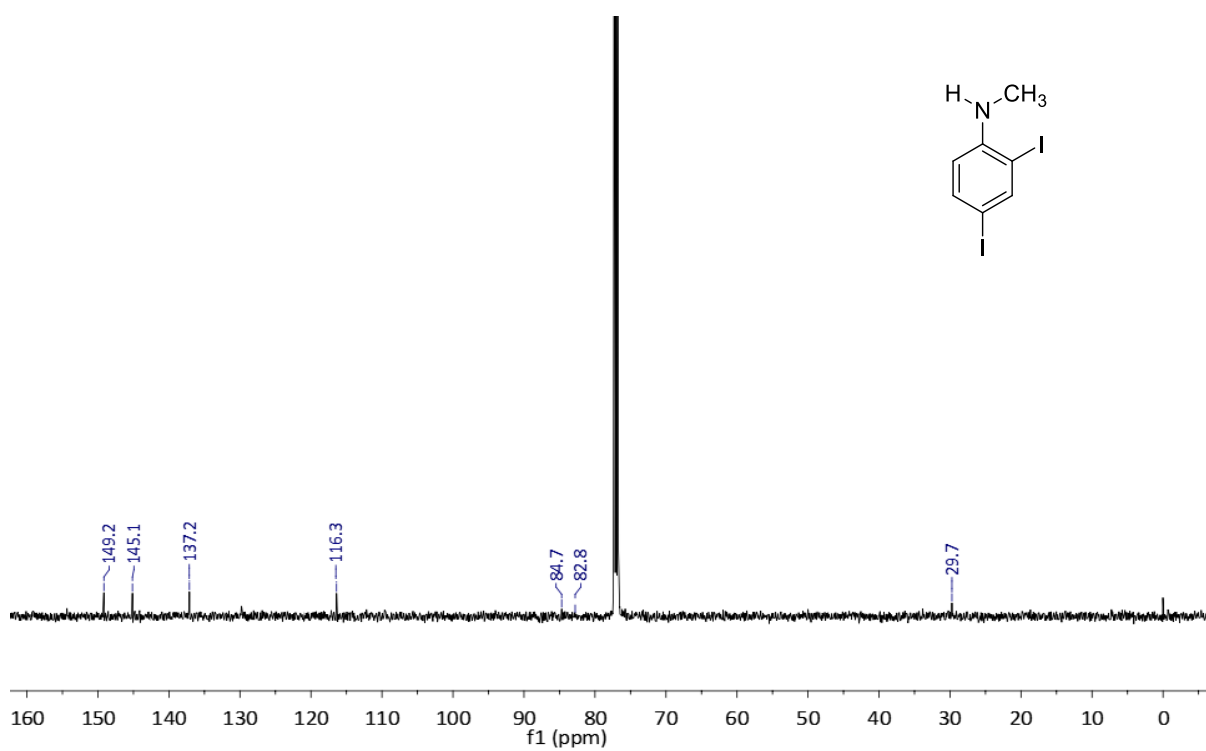

<sup>13</sup>C NMR of 19d in CDCl<sub>3</sub>

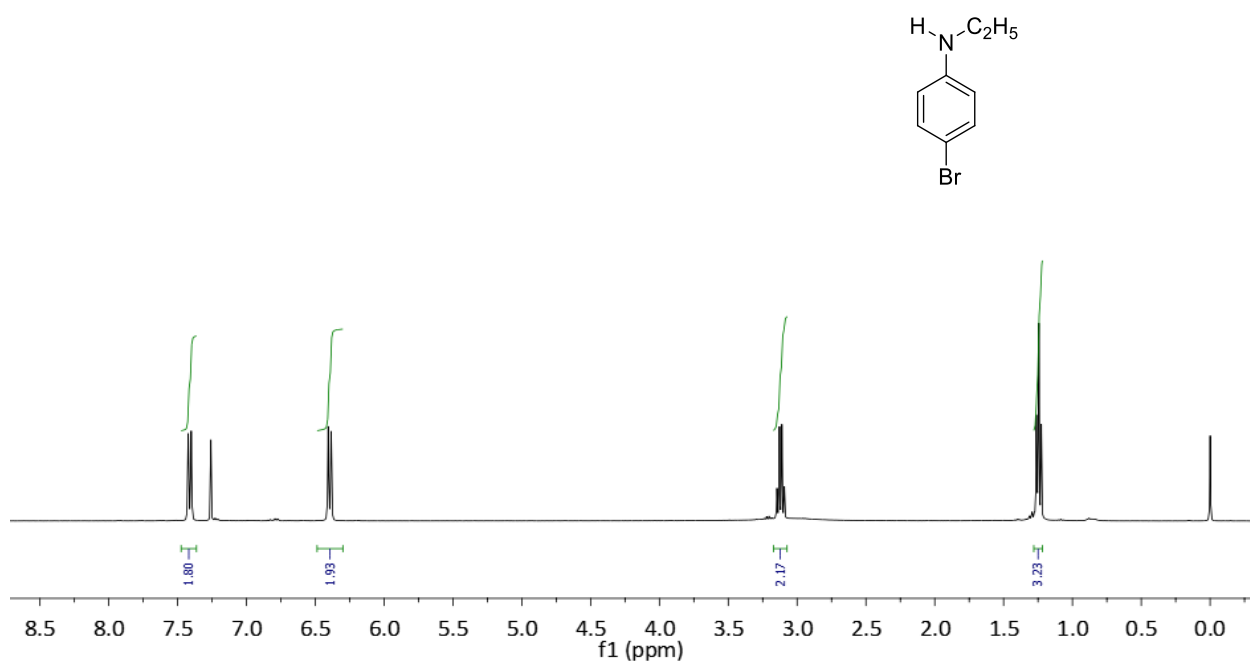

<sup>1</sup>H-NMR of 20a in CDCl<sub>3</sub>

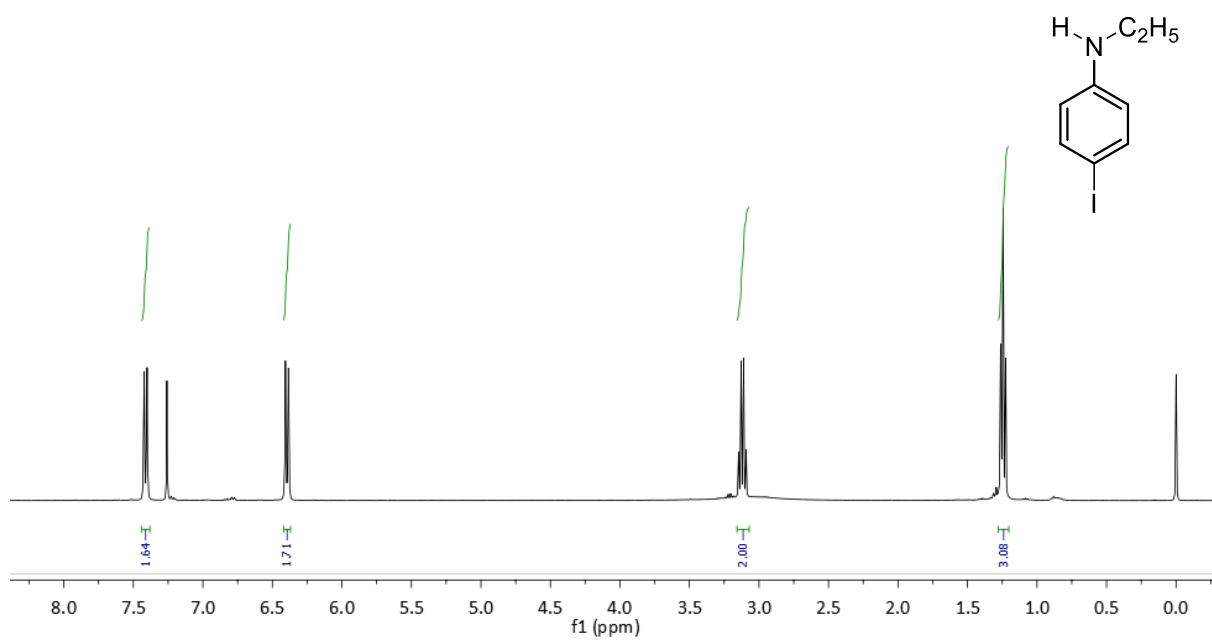

<sup>1</sup>H-NMR of 20b in CDCl<sub>3</sub>

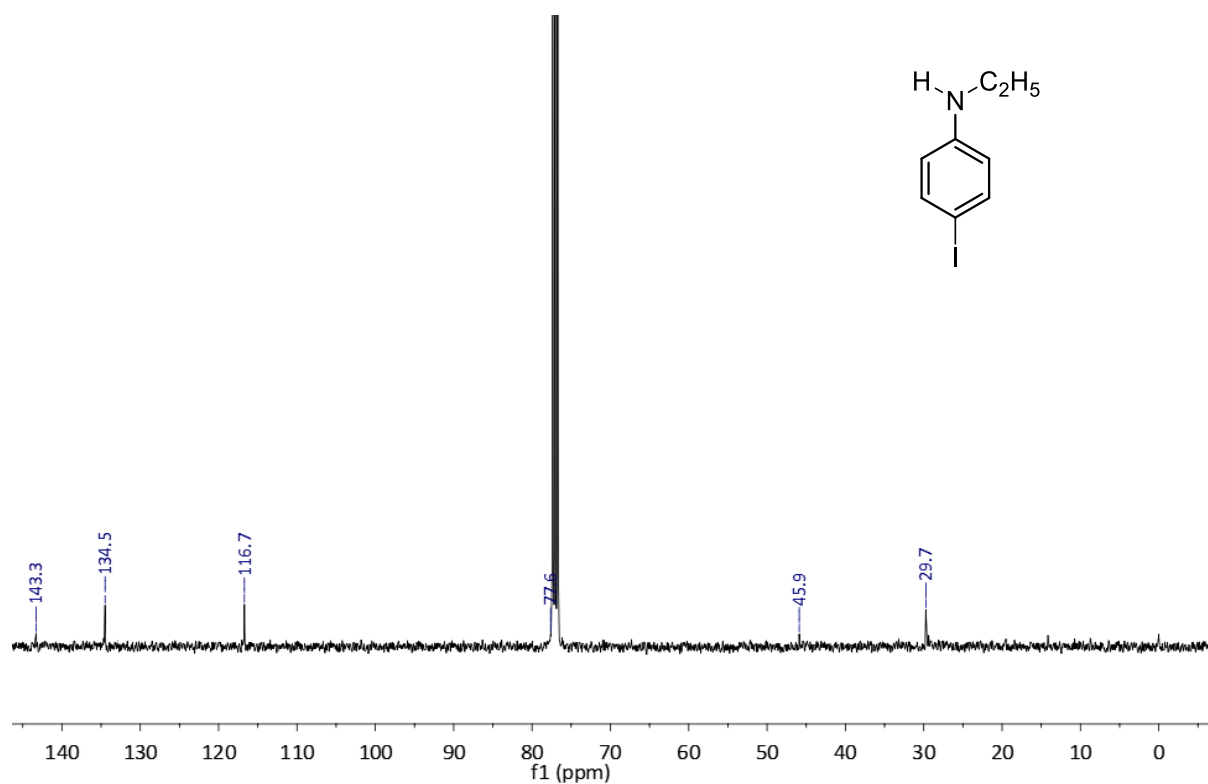

$^{13}\text{C}$  NMR of 20b in  $\text{CDCl}_3$

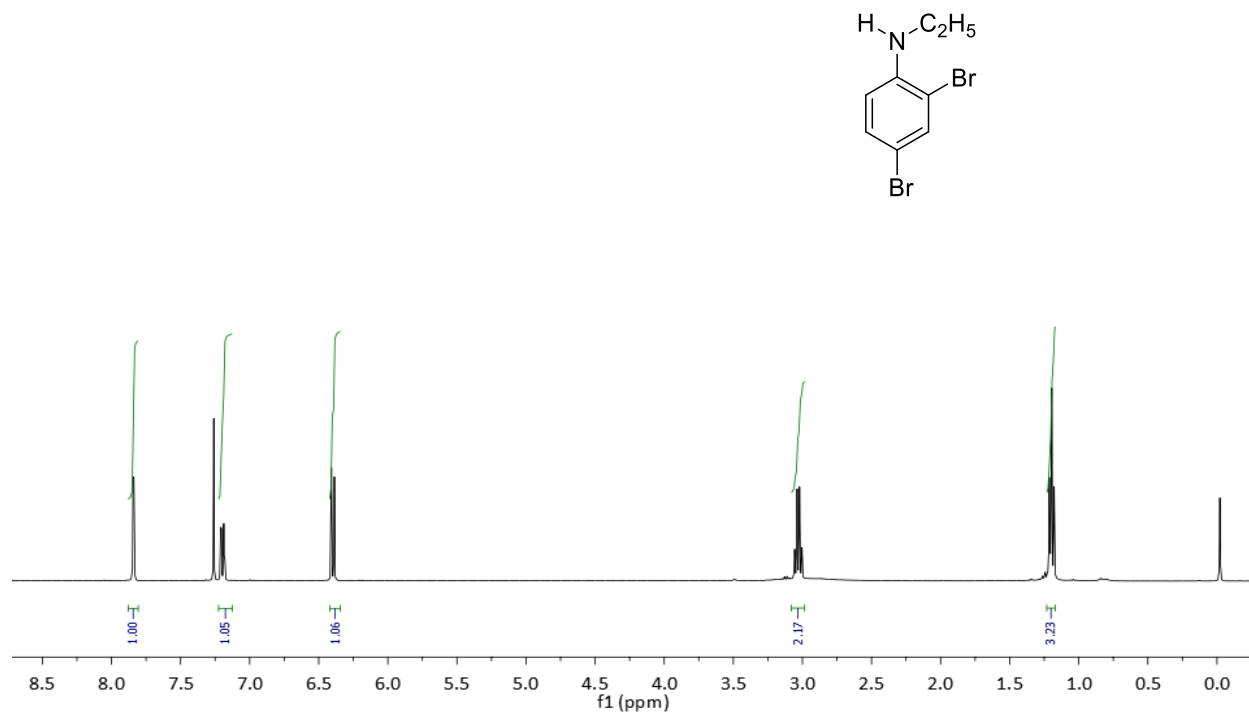

$^1\text{H}$ -NMR of 20c in  $\text{CDCl}_3$

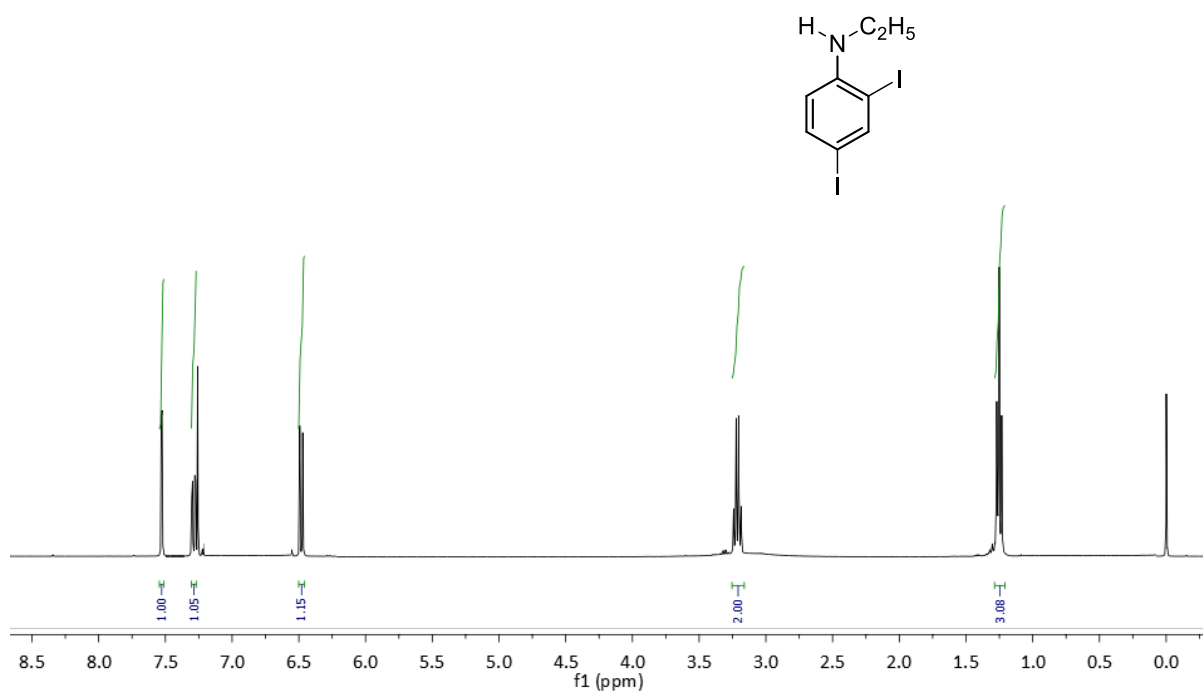

<sup>1</sup>H-NMR of 20d in CDCl<sub>3</sub>

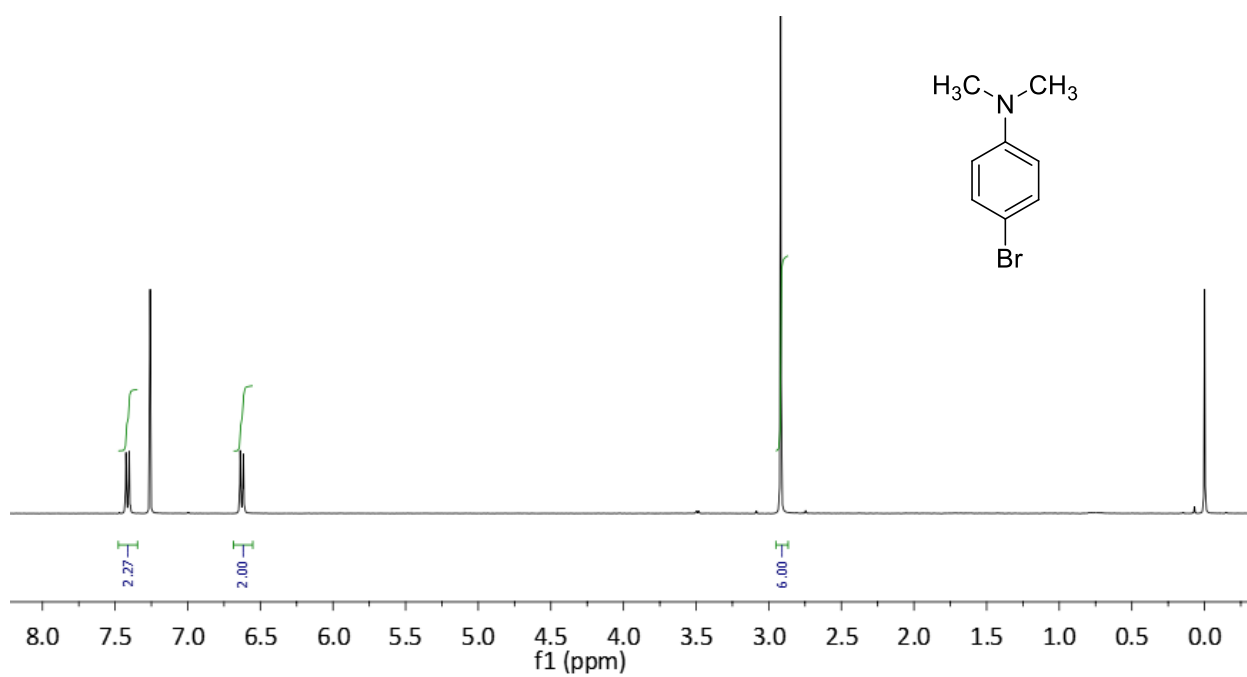

<sup>1</sup>H-NMR of 21a in CDCl<sub>3</sub>

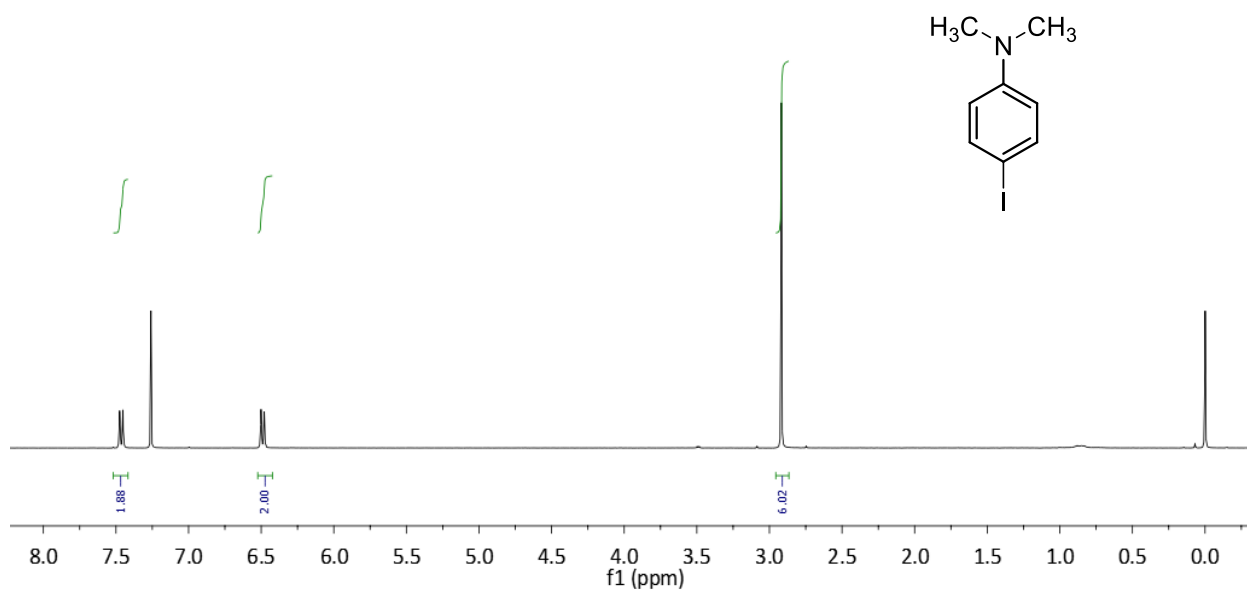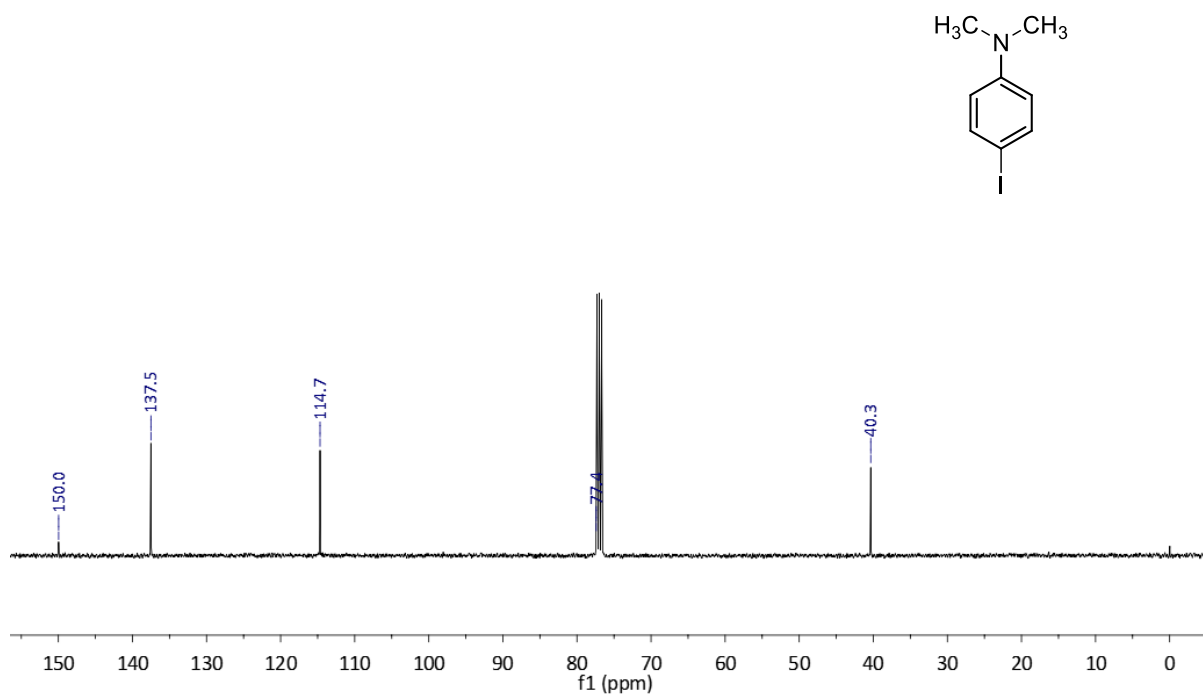

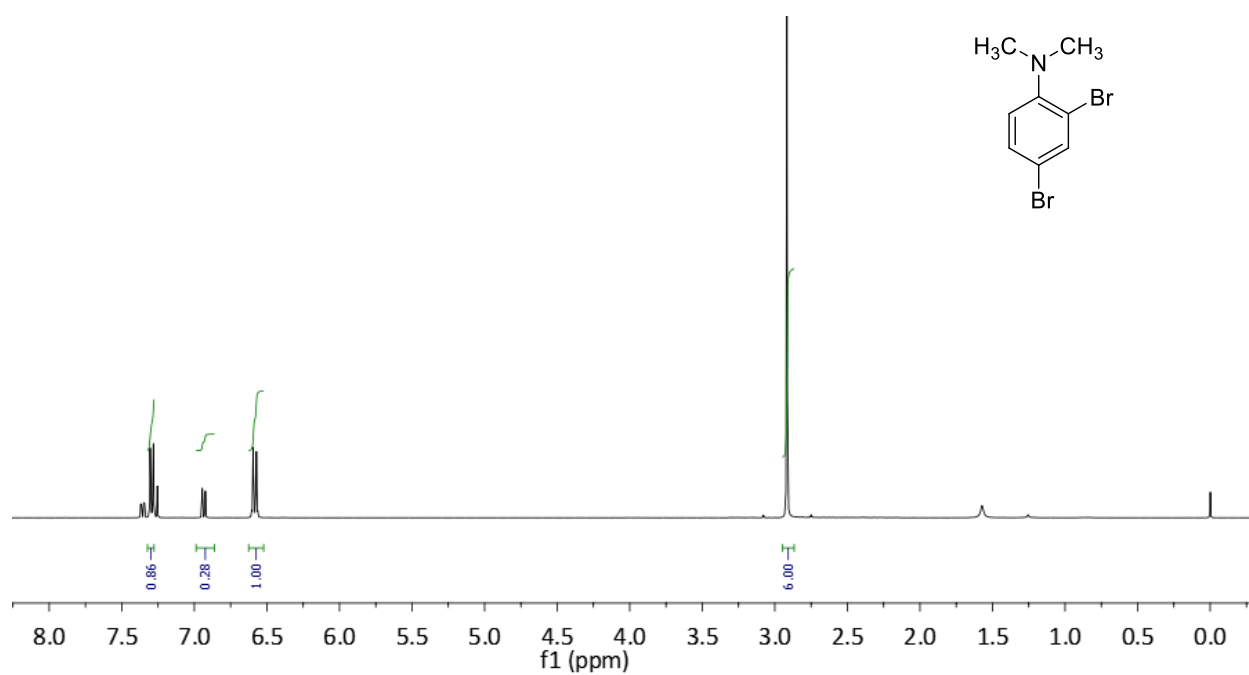

<sup>1</sup>H-NMR of 21c in CDCl<sub>3</sub>

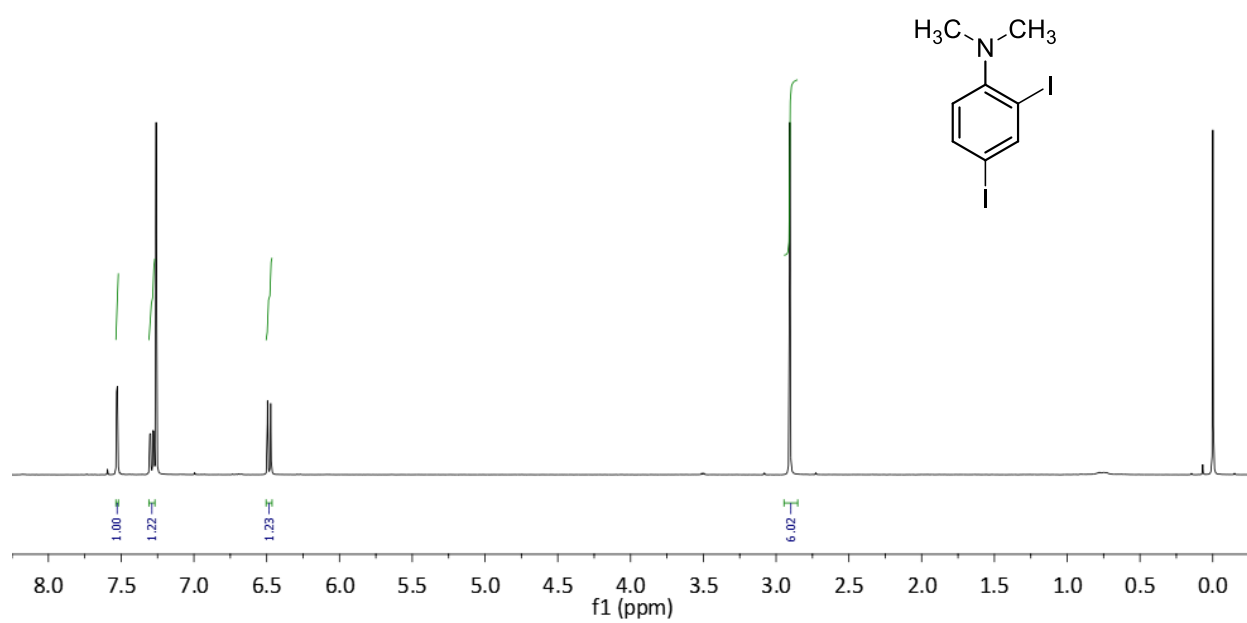

<sup>1</sup>H-NMR of 21d in CDCl<sub>3</sub>



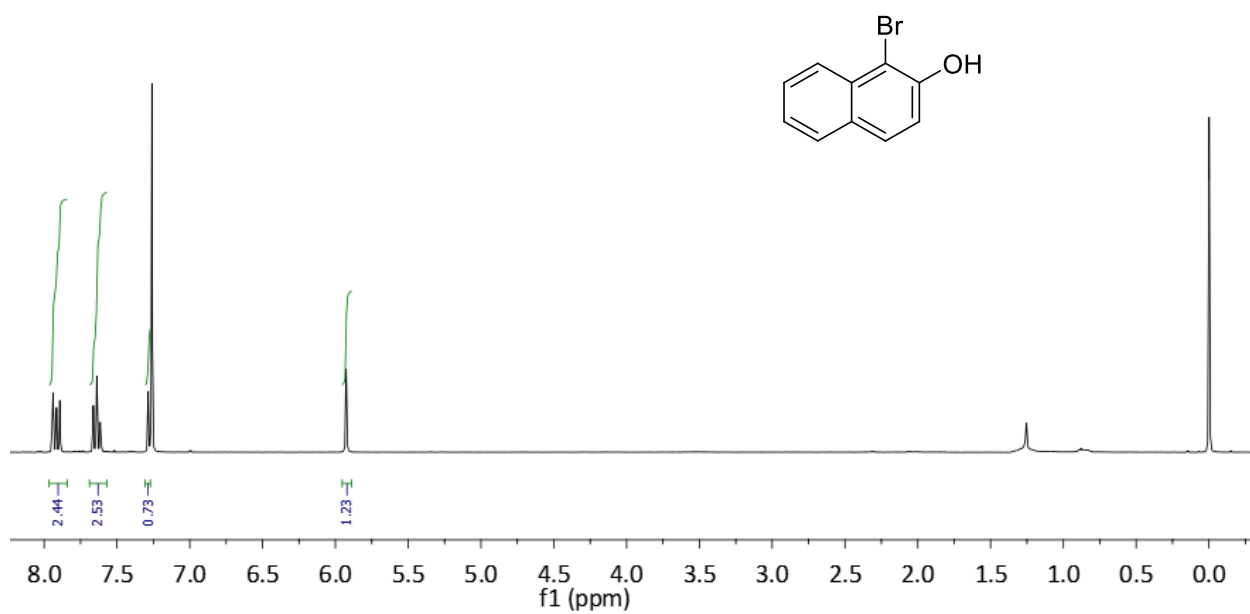

$^1\text{H-NMR}$  of 25a in  $\text{CDCl}_3$

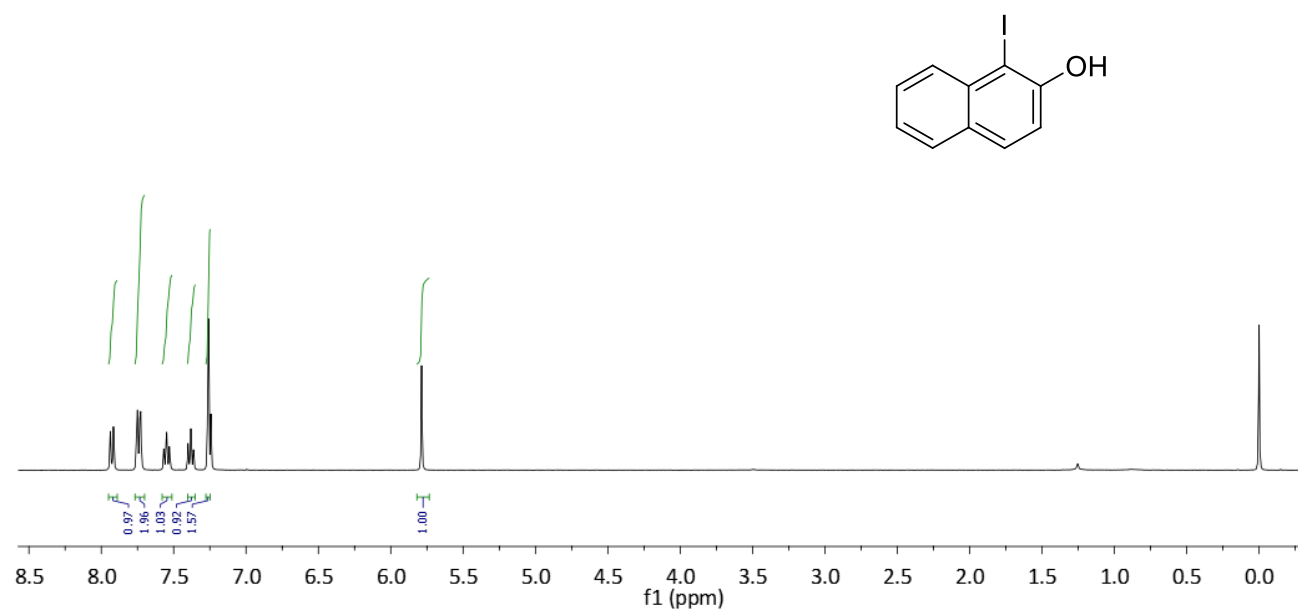

$^1\text{H-NMR}$  of 25b in  $\text{CDCl}_3$

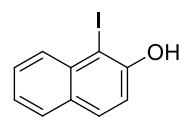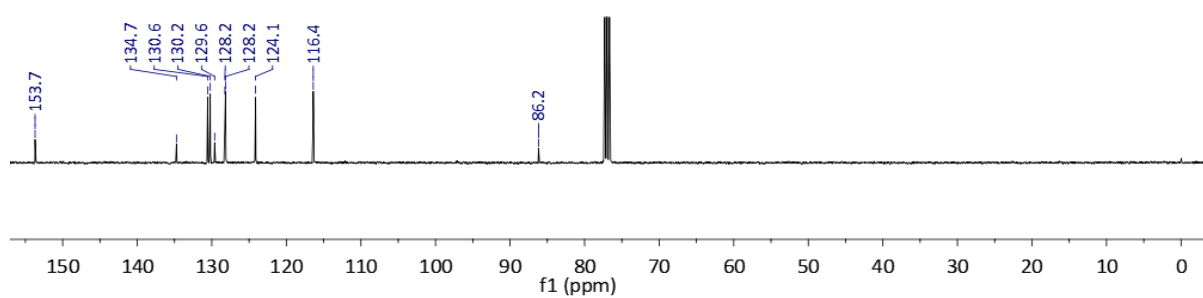

$^{13}\text{C}$  NMR of 25b in  $\text{CDCl}_3$

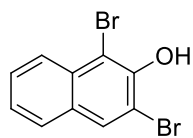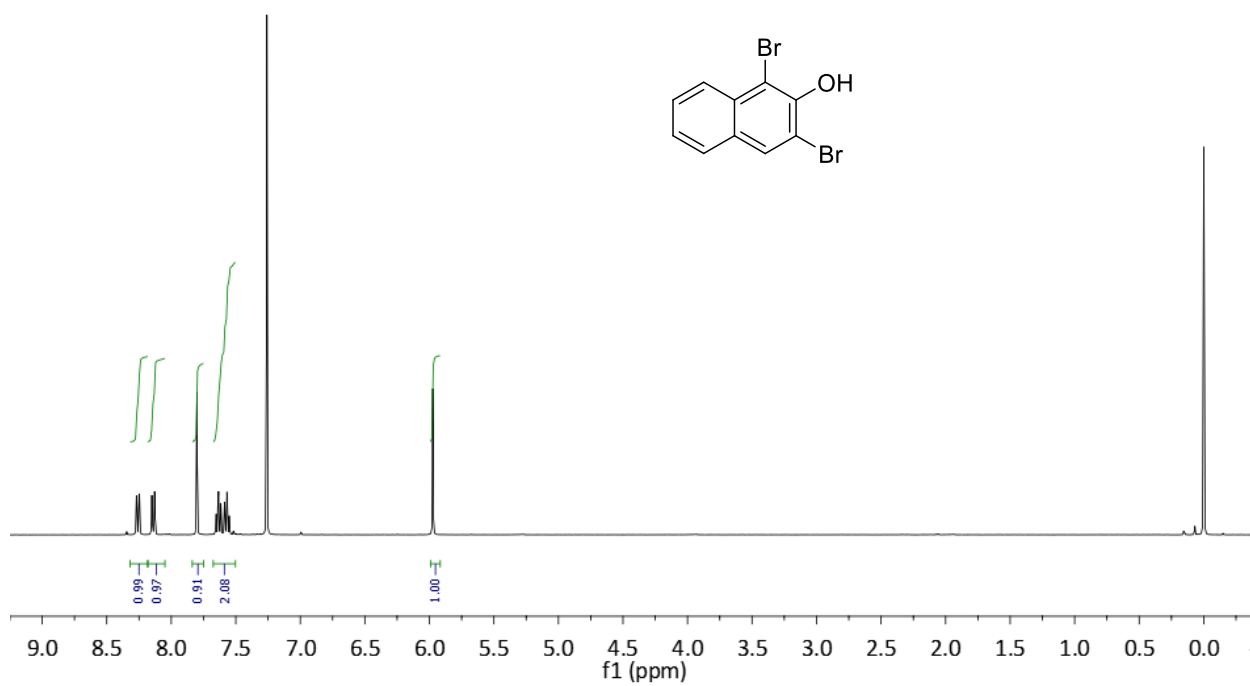

$^1\text{H}$ -NMR of 25c in  $\text{CDCl}_3$

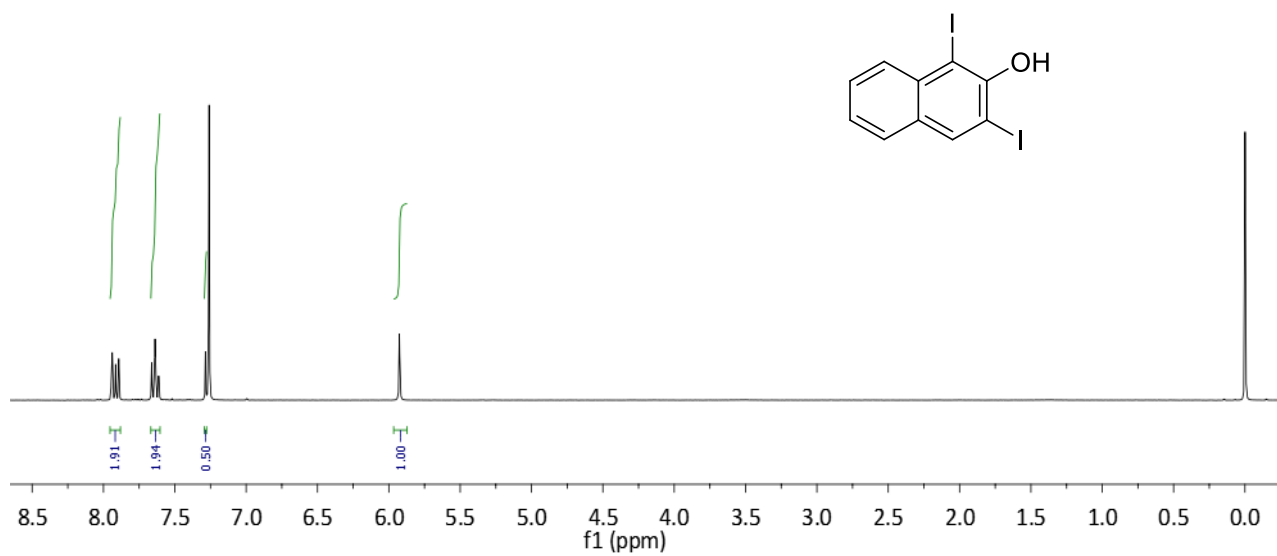

$^1\text{H-NMR}$  of 25d in  $\text{CDCl}_3$

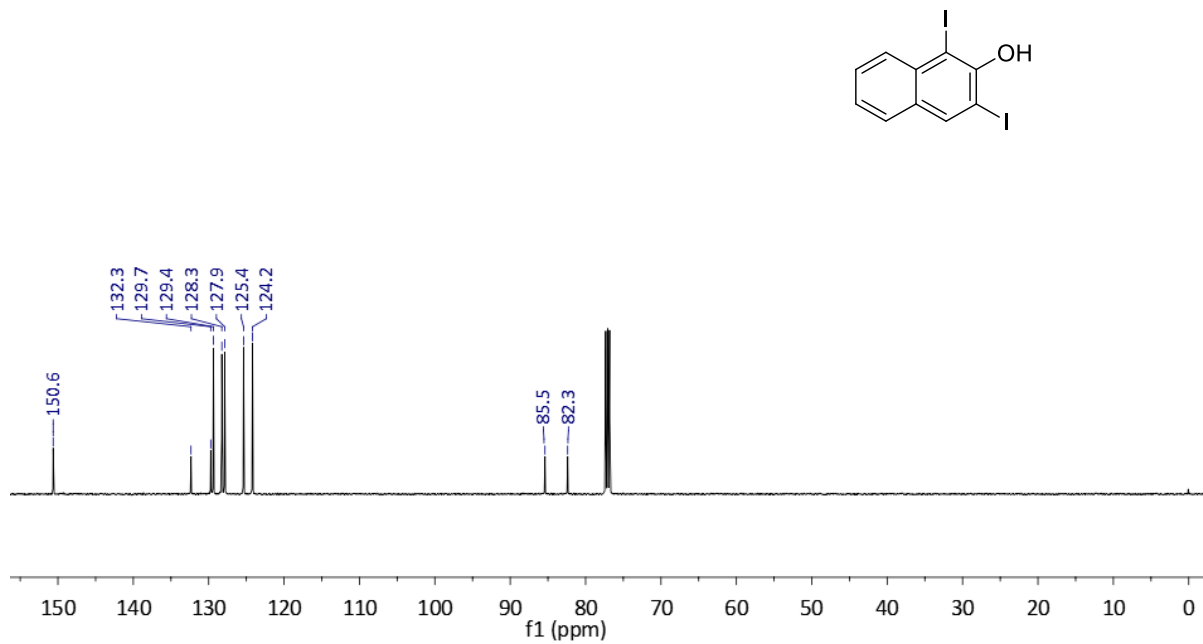

$^{13}\text{C-NMR}$  of 25d in  $\text{CDCl}_3$

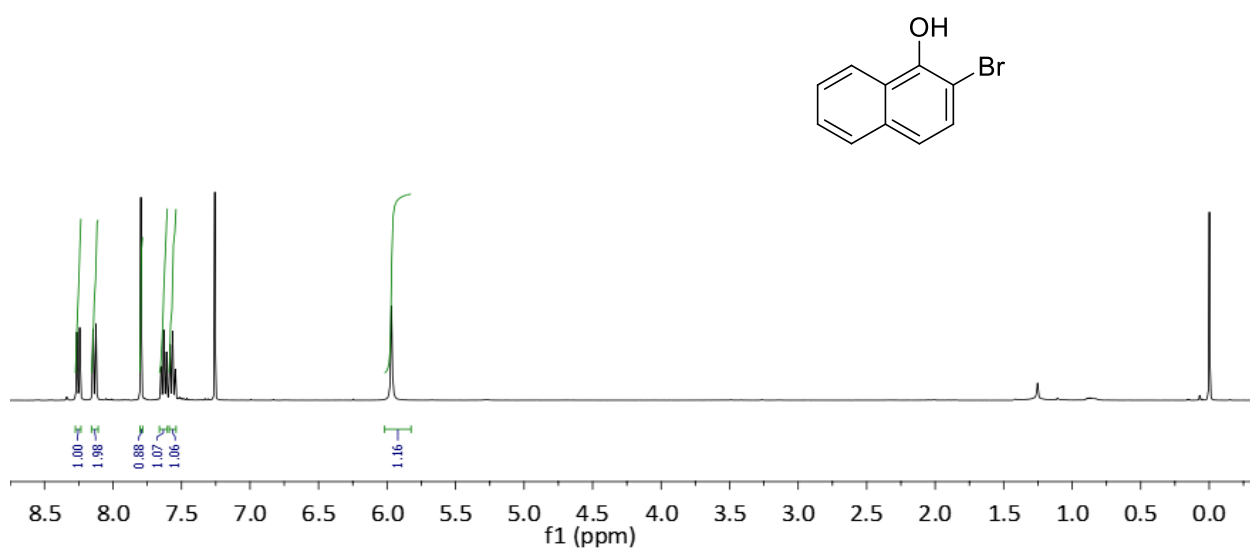

$^1\text{H}$ -NMR of 26a in CDCl<sub>3</sub>

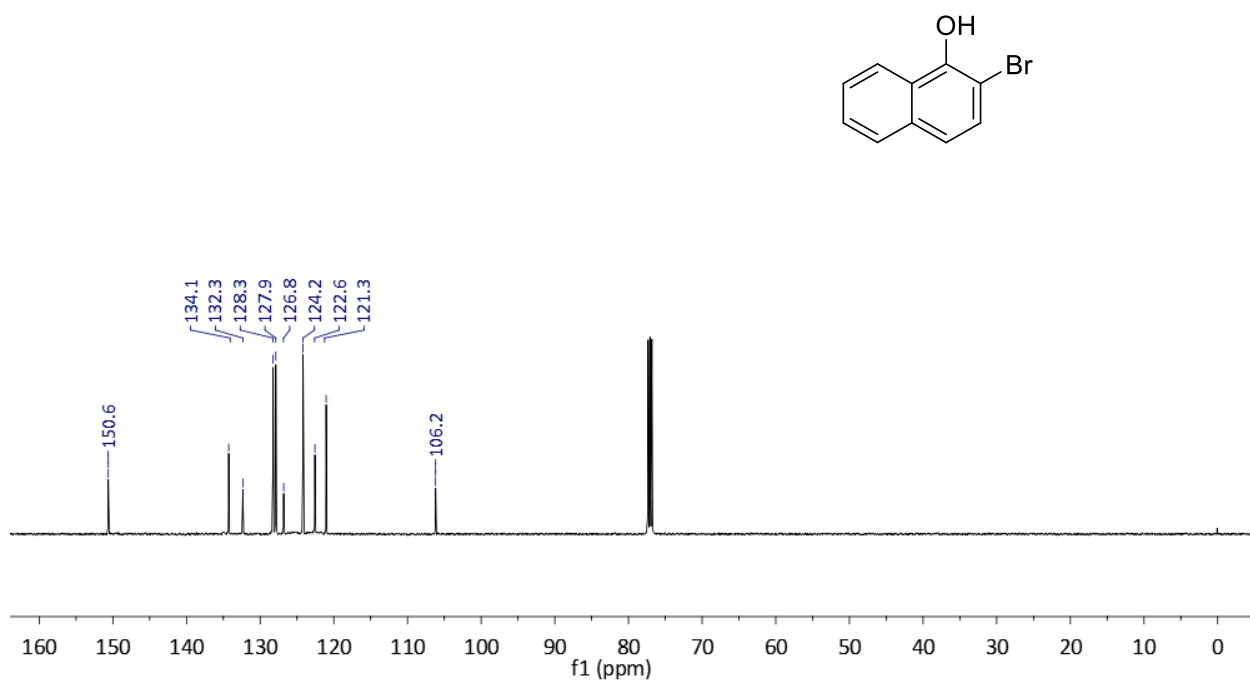

$^{13}\text{C}$ -NMR of 26a in CDCl<sub>3</sub>

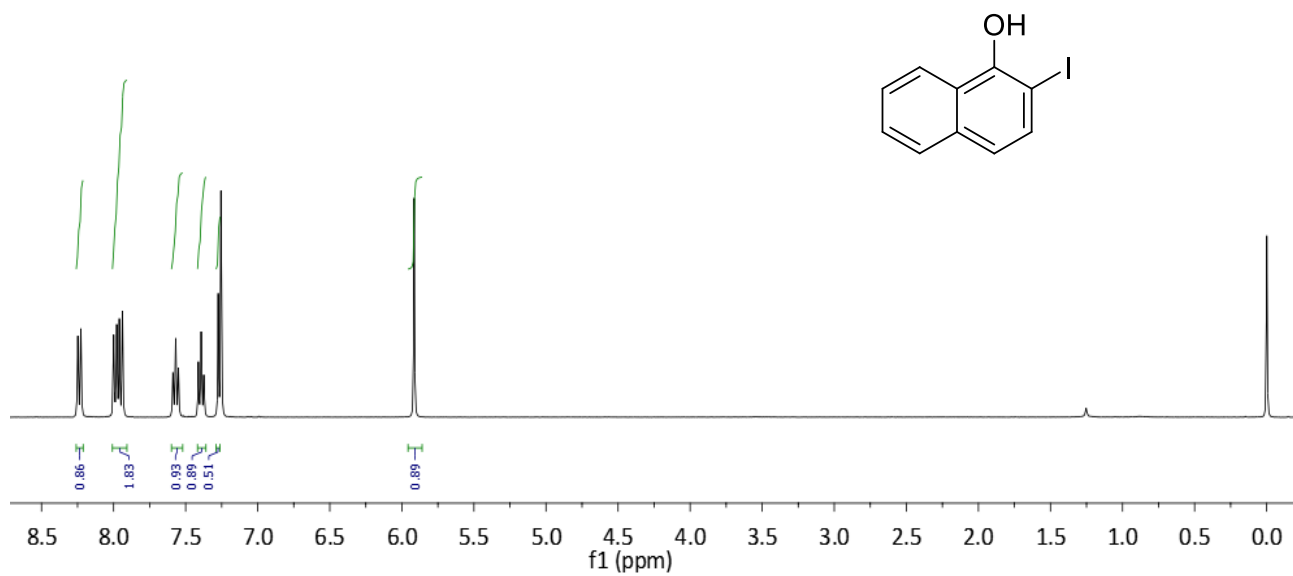

$^1\text{H}$ -NMR of 26b in  $\text{CDCl}_3$

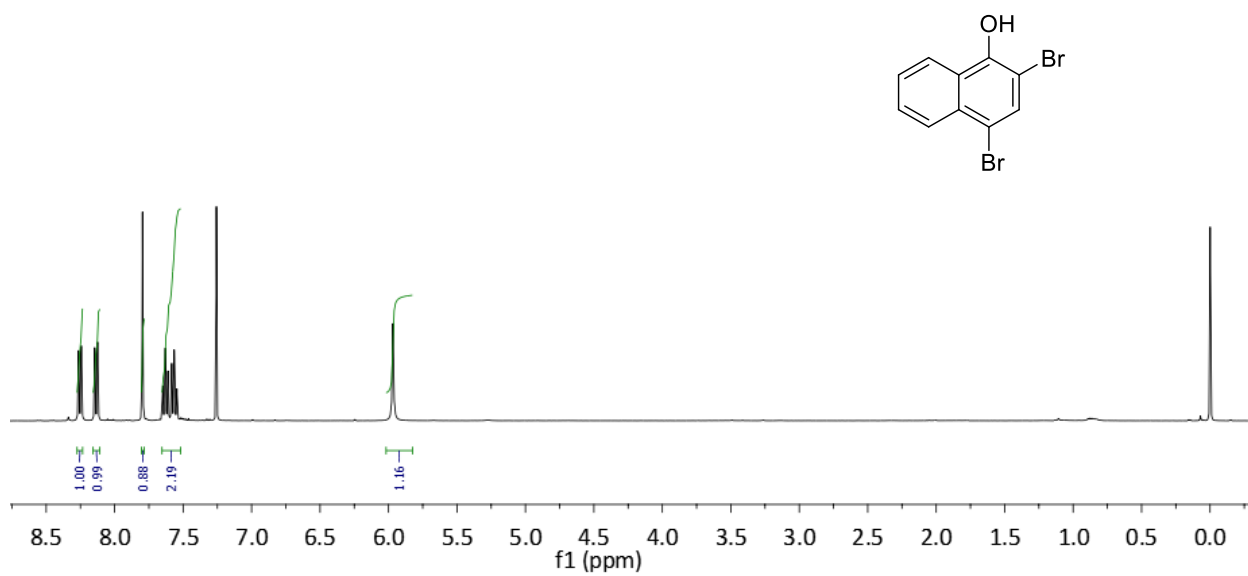

$^1\text{H}$ -NMR of 26c in  $\text{CDCl}_3$

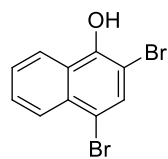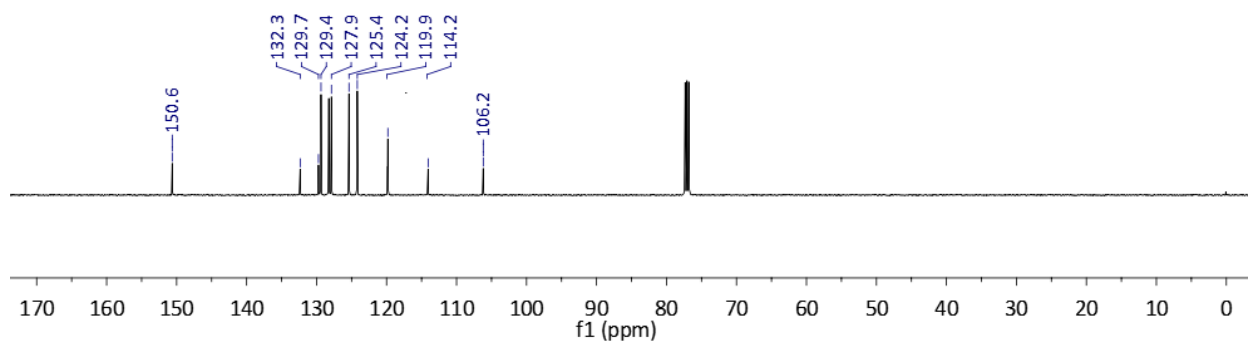

$^{13}\text{C}$ -NMR of 26c in  $\text{CDCl}_3$

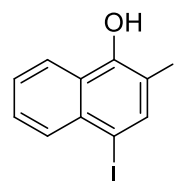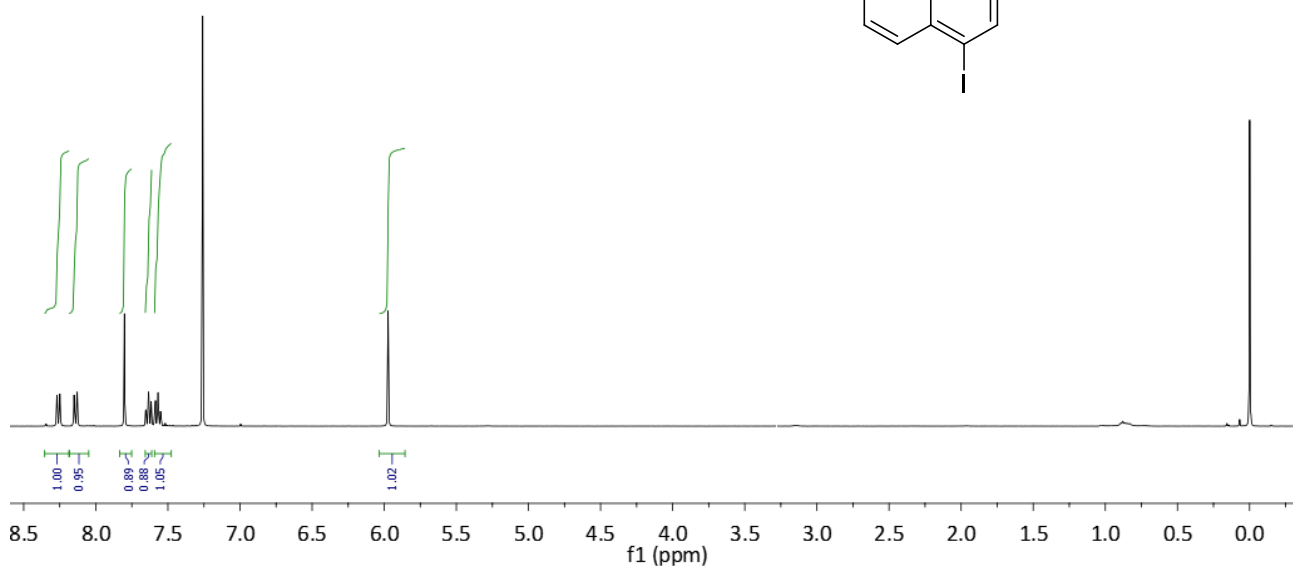

$^1\text{H}$ -NMR of 26d in  $\text{CDCl}_3$

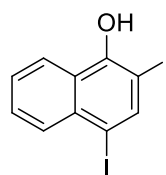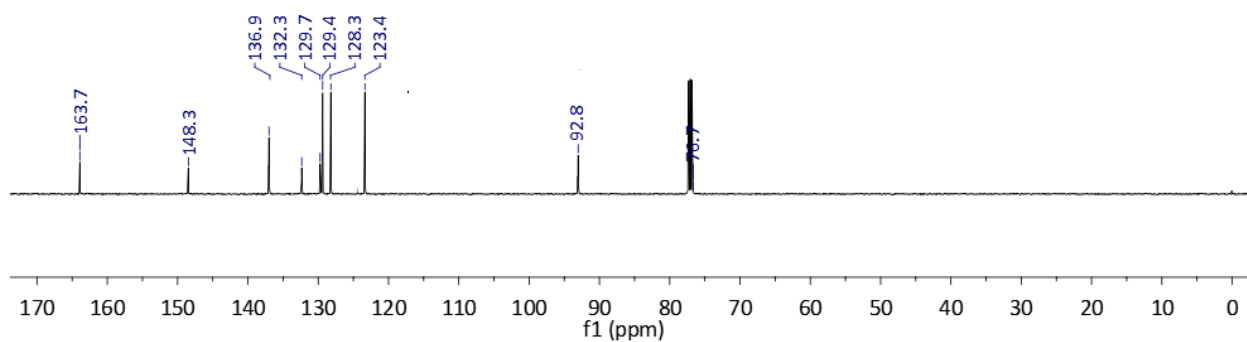

<sup>13</sup>C-NMR of 26d in CDCl<sub>3</sub>

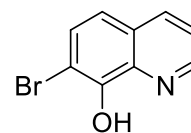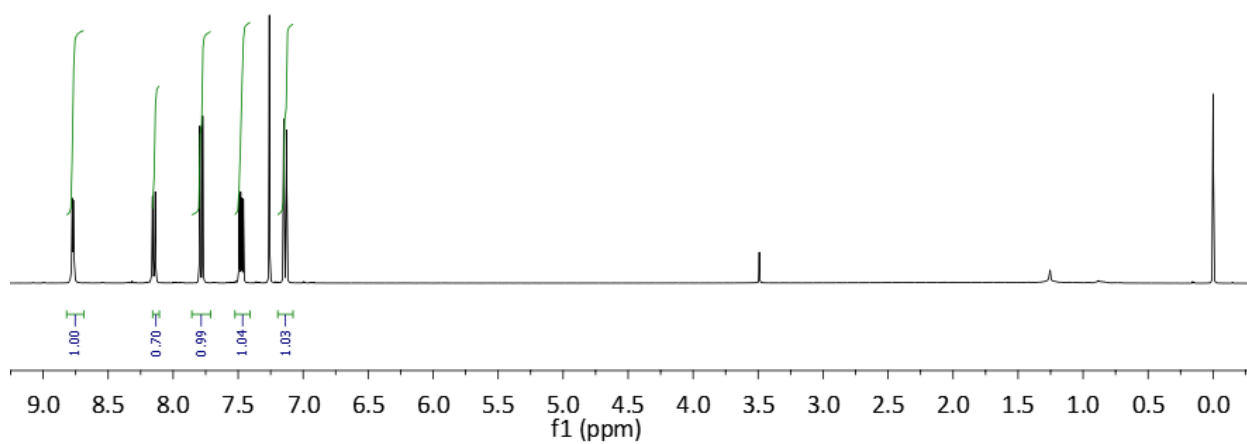

<sup>1</sup>H-NMR of 27a in CDCl<sub>3</sub>

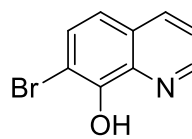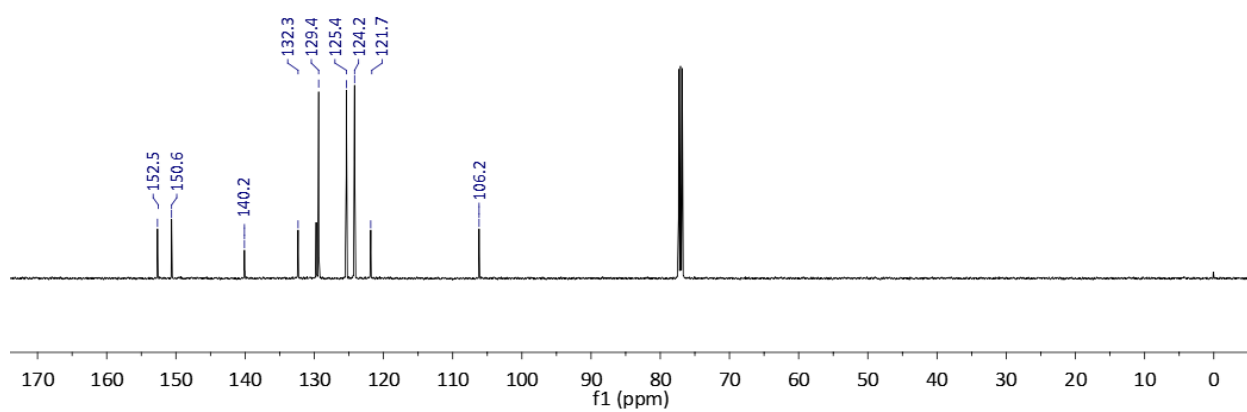

$^{13}\text{C}$ -NMR of 27a in  $\text{CDCl}_3$

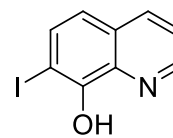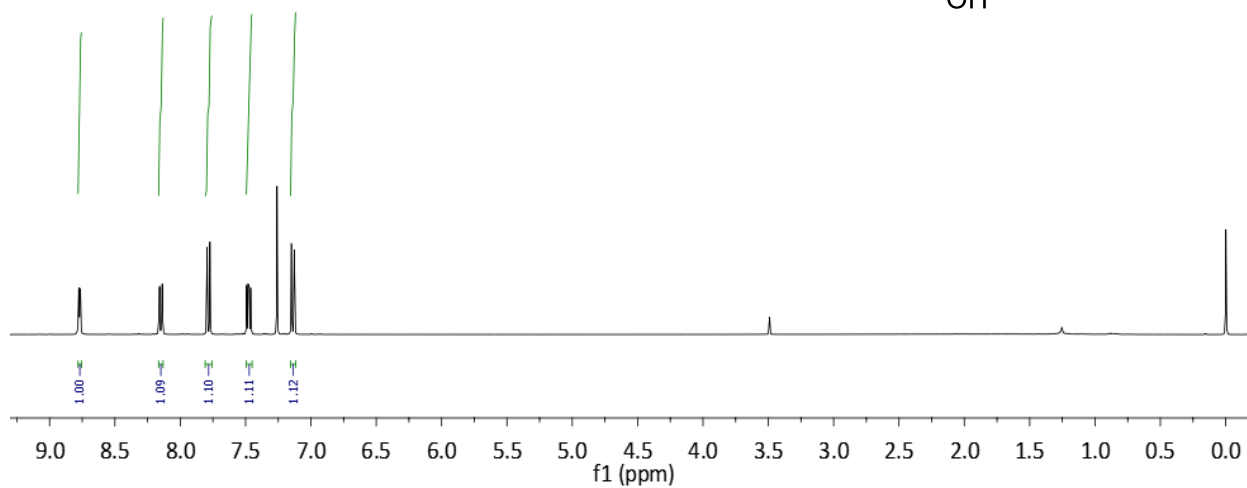

$^1\text{H}$ -NMR of 27b in  $\text{CDCl}_3$



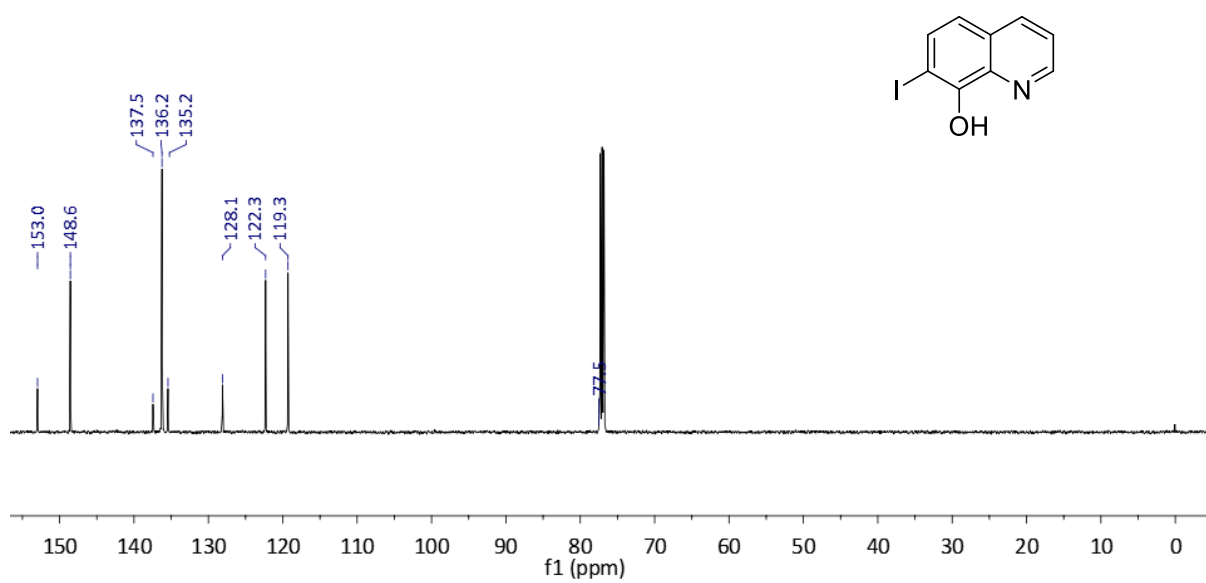

$^{13}\text{C}$  NMR of 27b in  $\text{CDCl}_3$

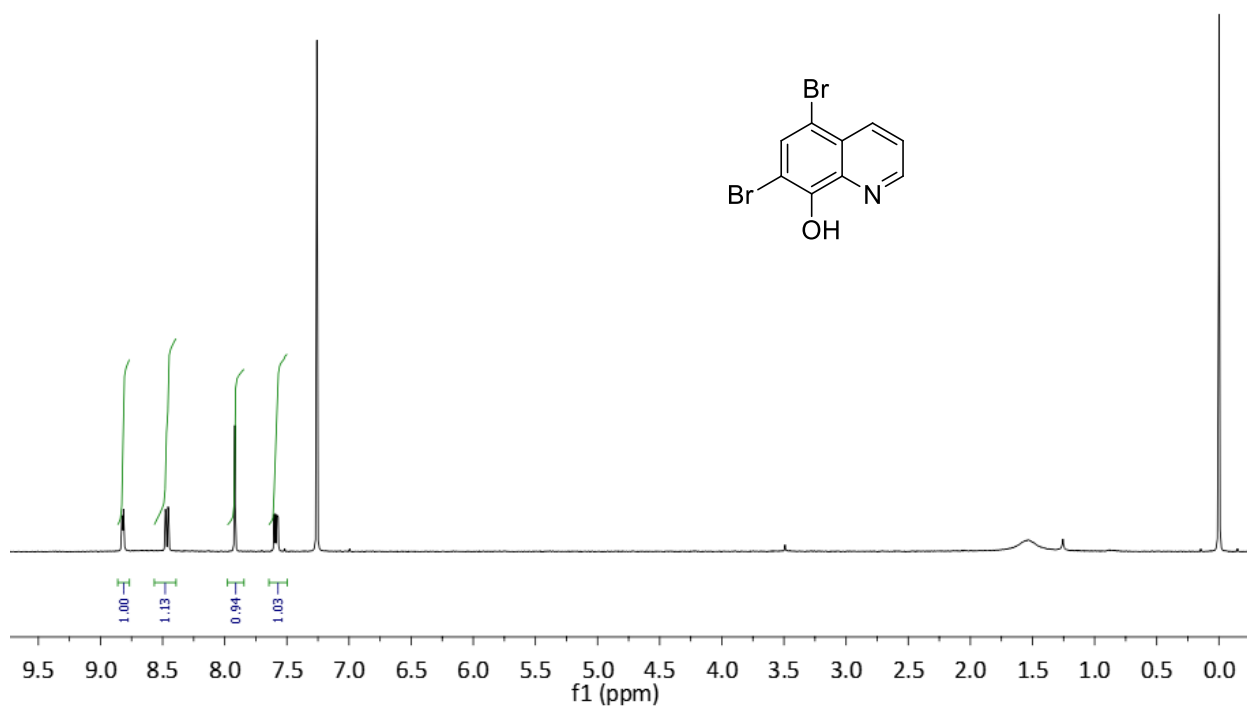

$^1\text{H}$ -NMR of 27c in  $\text{CDCl}_3$

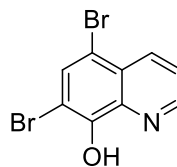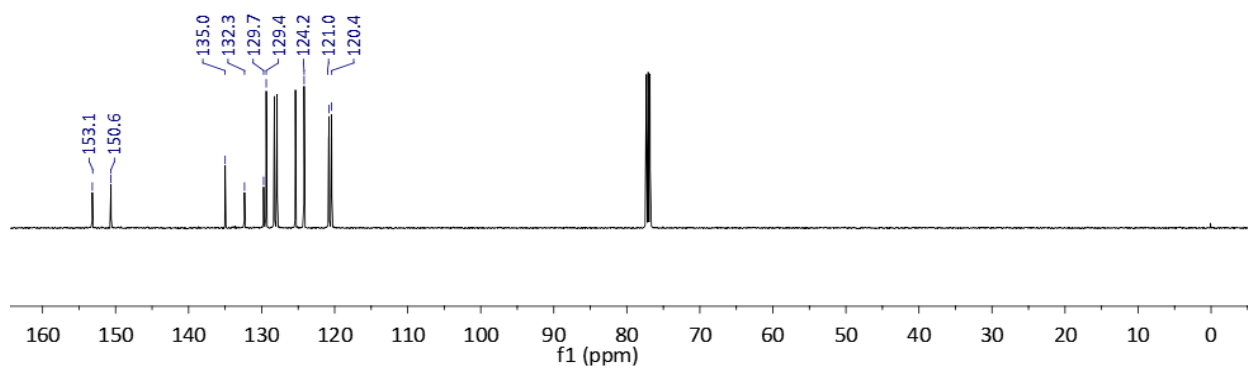

$^{13}\text{C}$ -NMR of 27c in  $\text{CDCl}_3$

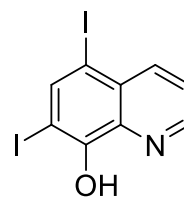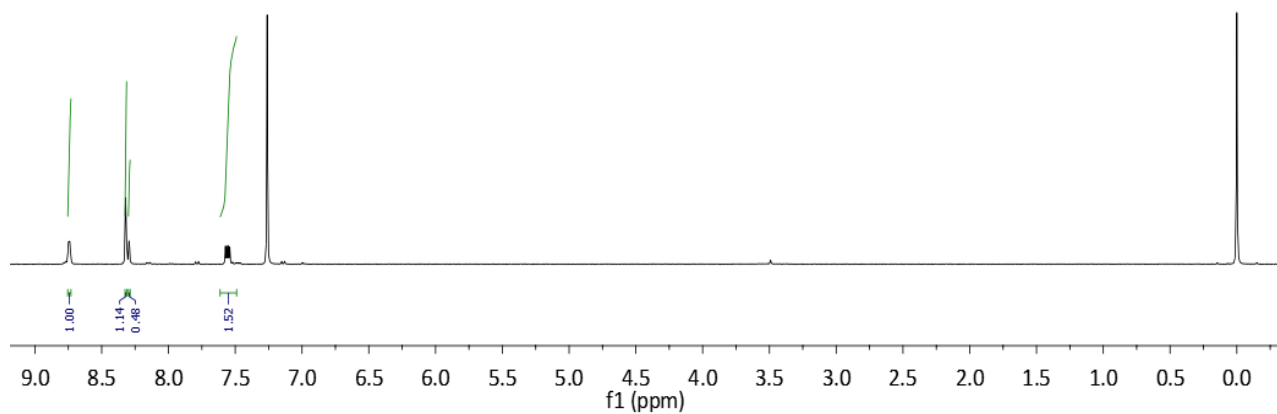

$^1\text{H}$ -NMR of 27d in  $\text{CDCl}_3$

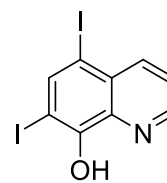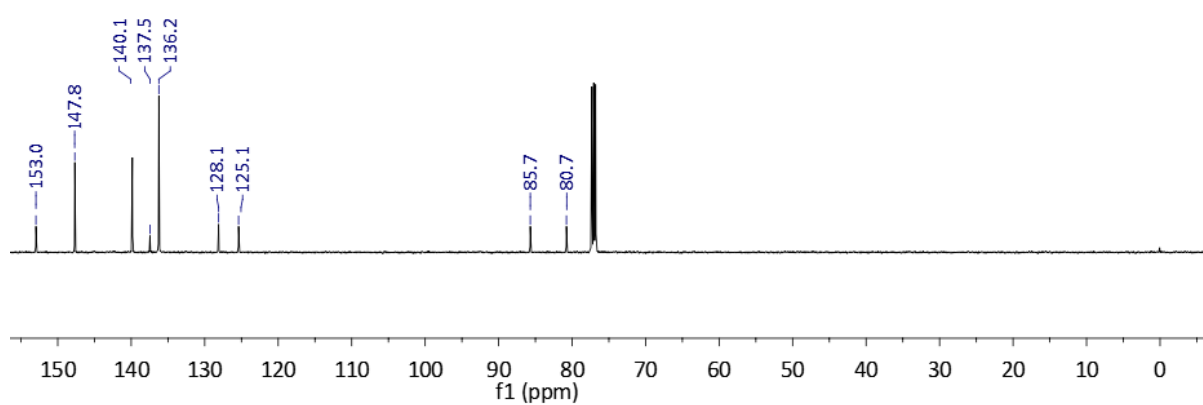

$^{13}\text{C}$  NMR of 27d in  $\text{CDCl}_3$

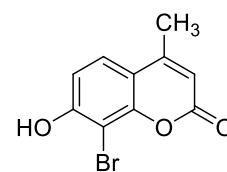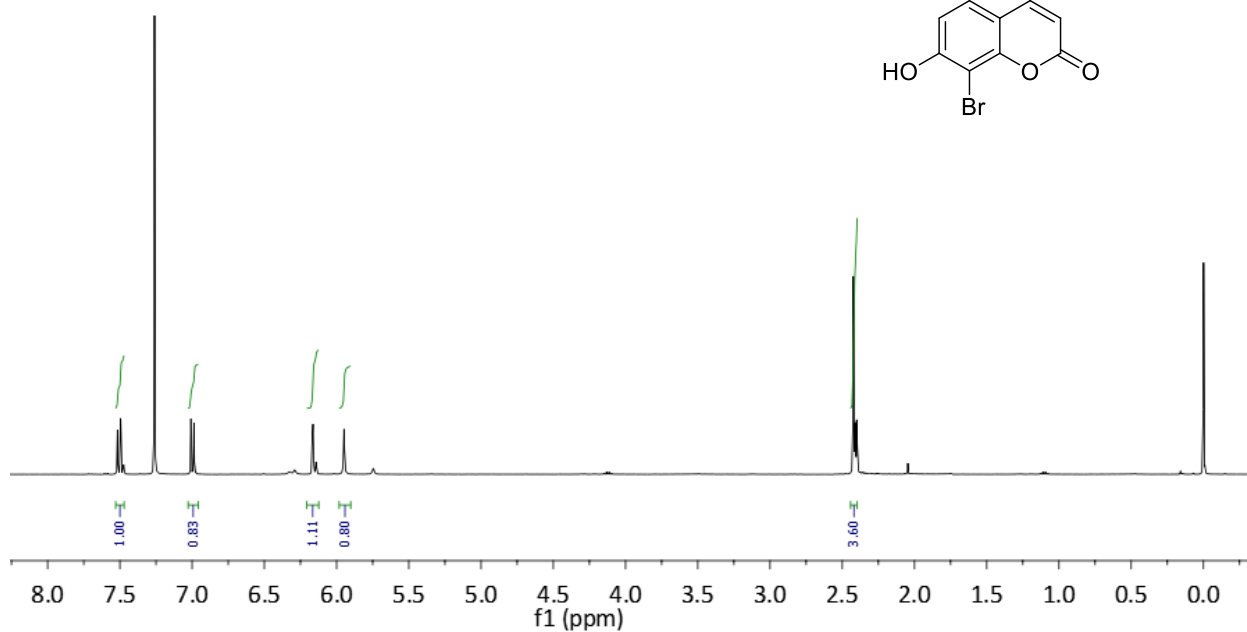

$^1\text{H}$ -NMR of 28a in  $\text{CDCl}_3$

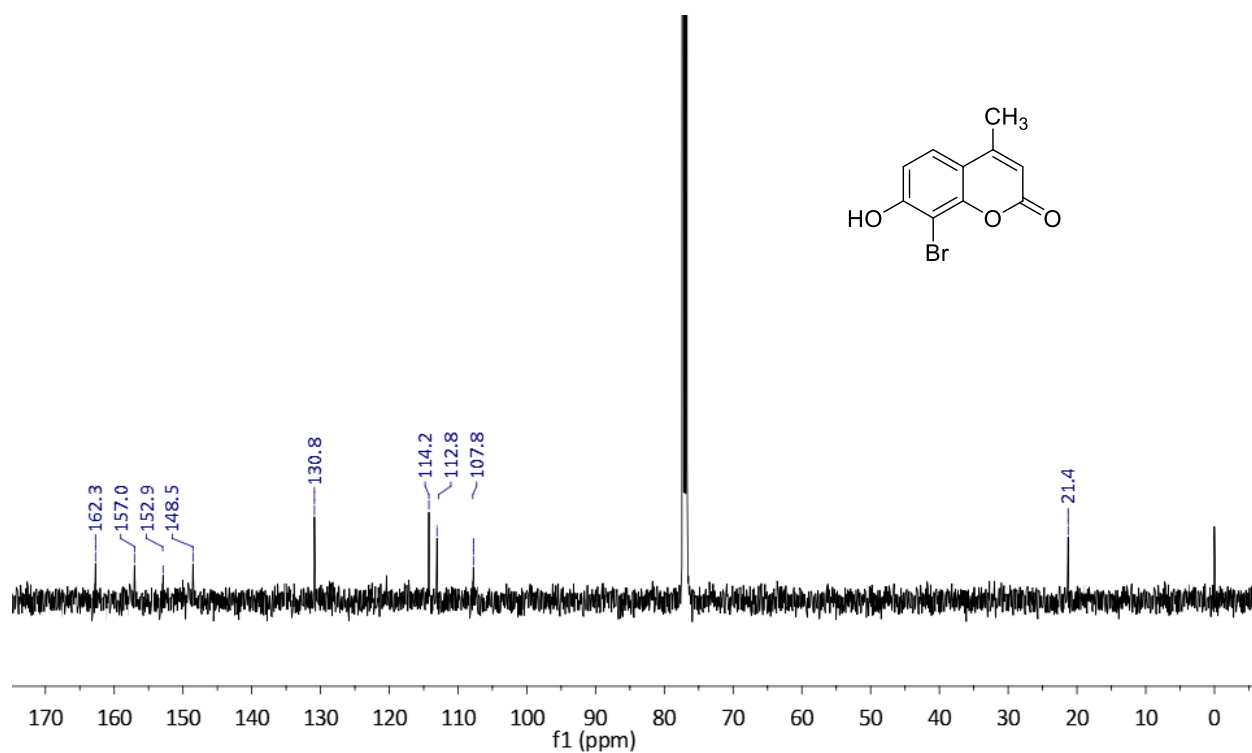

<sup>13</sup>C-NMR of 28a in CDCl<sub>3</sub>

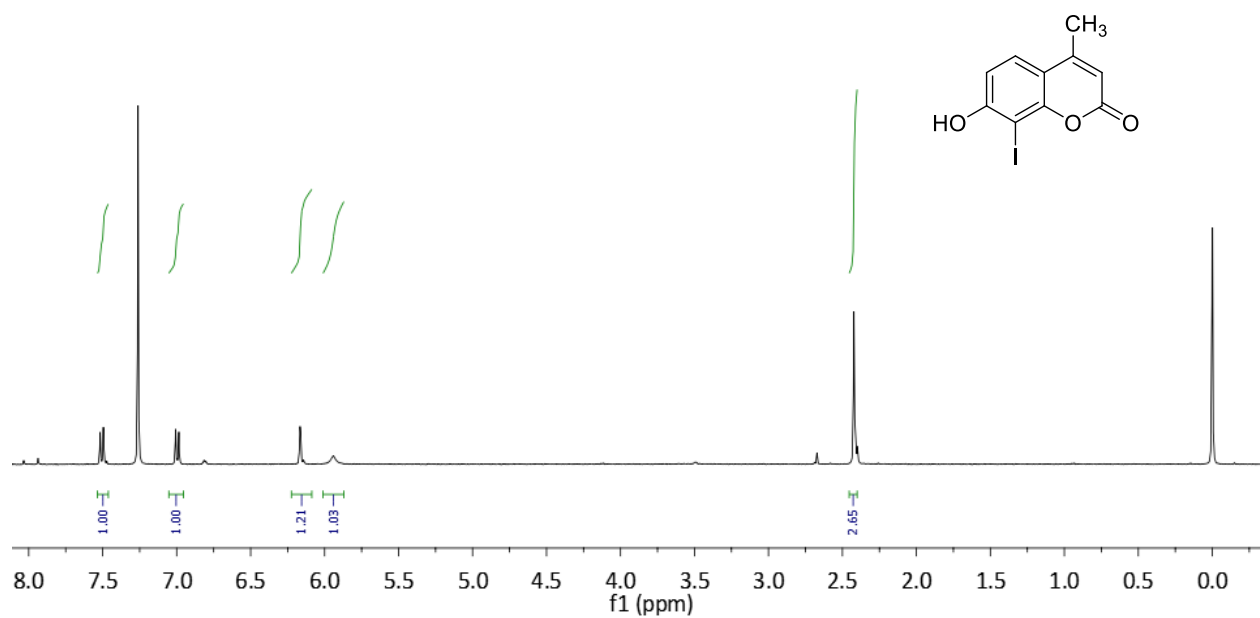

<sup>1</sup>H-NMR of 28b in CDCl<sub>3</sub>

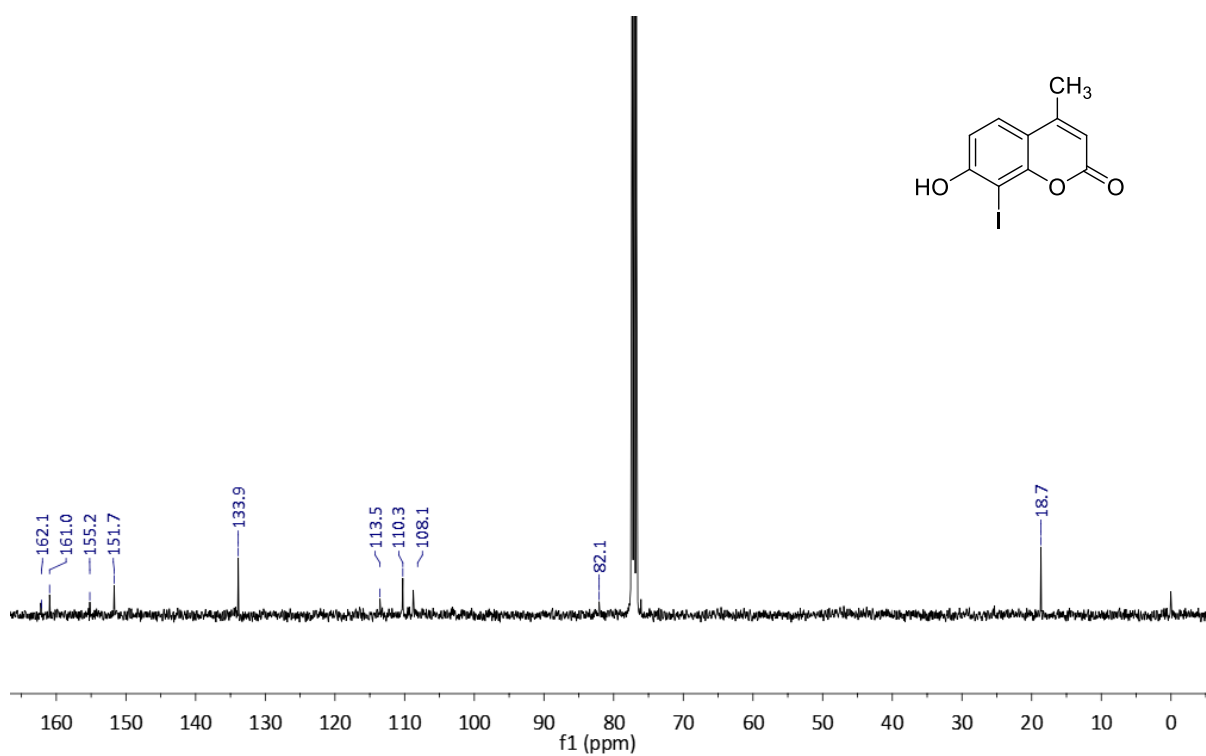

<sup>13</sup>C NMR of 28b in CDCl<sub>3</sub>

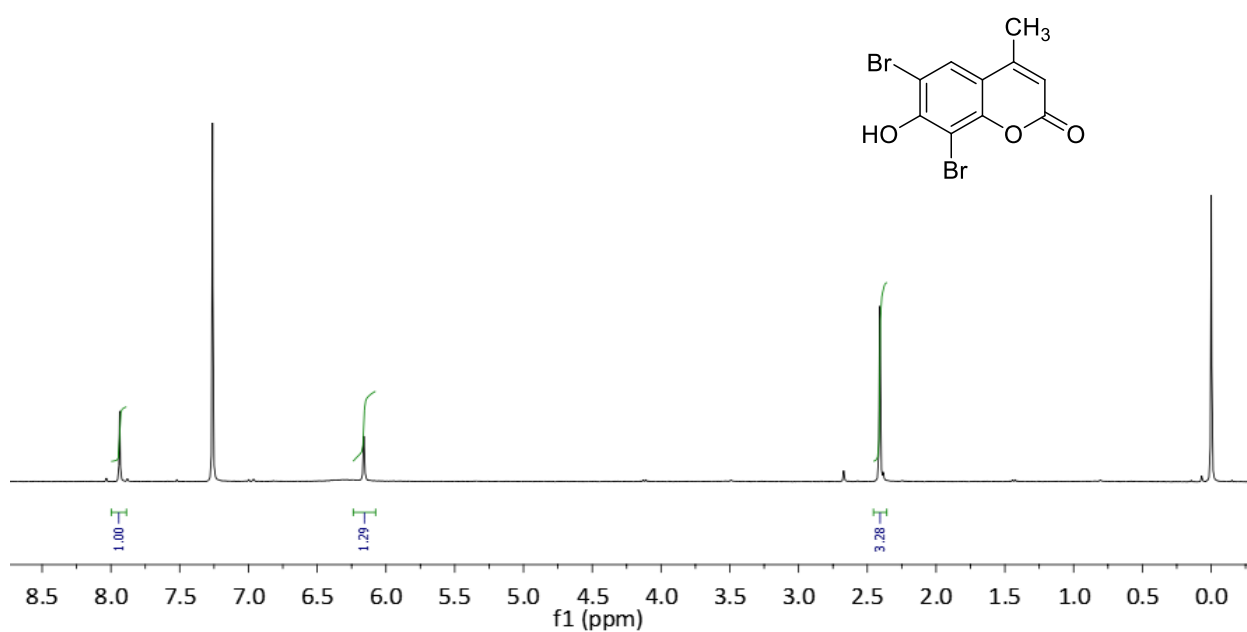

<sup>1</sup>H-NMR of 28c in CDCl<sub>3</sub>

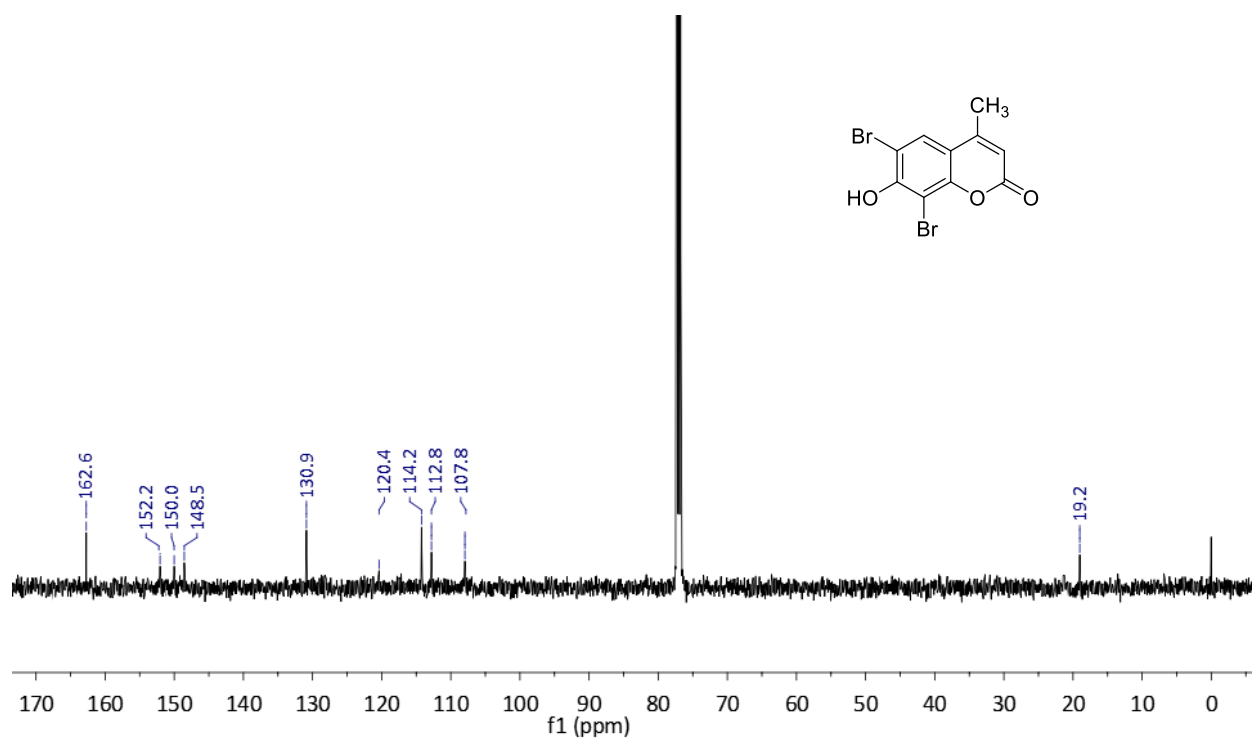

<sup>13</sup>C-NMR of 28c in CDCl<sub>3</sub>

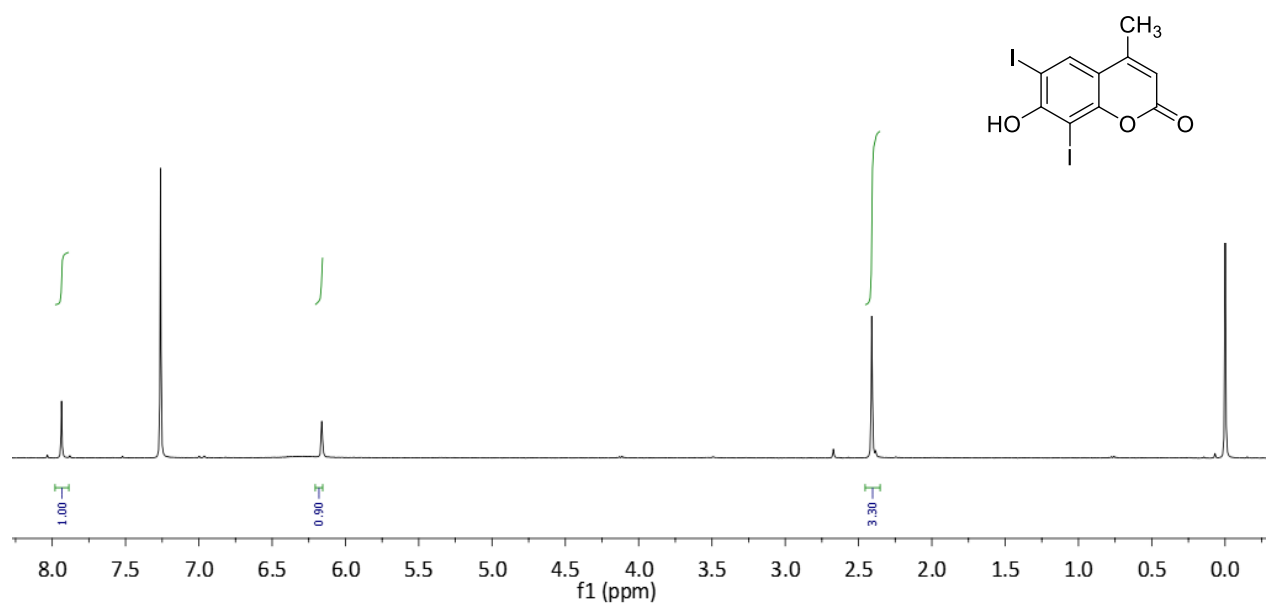

<sup>1</sup>H-NMR of 28d in CDCl<sub>3</sub>

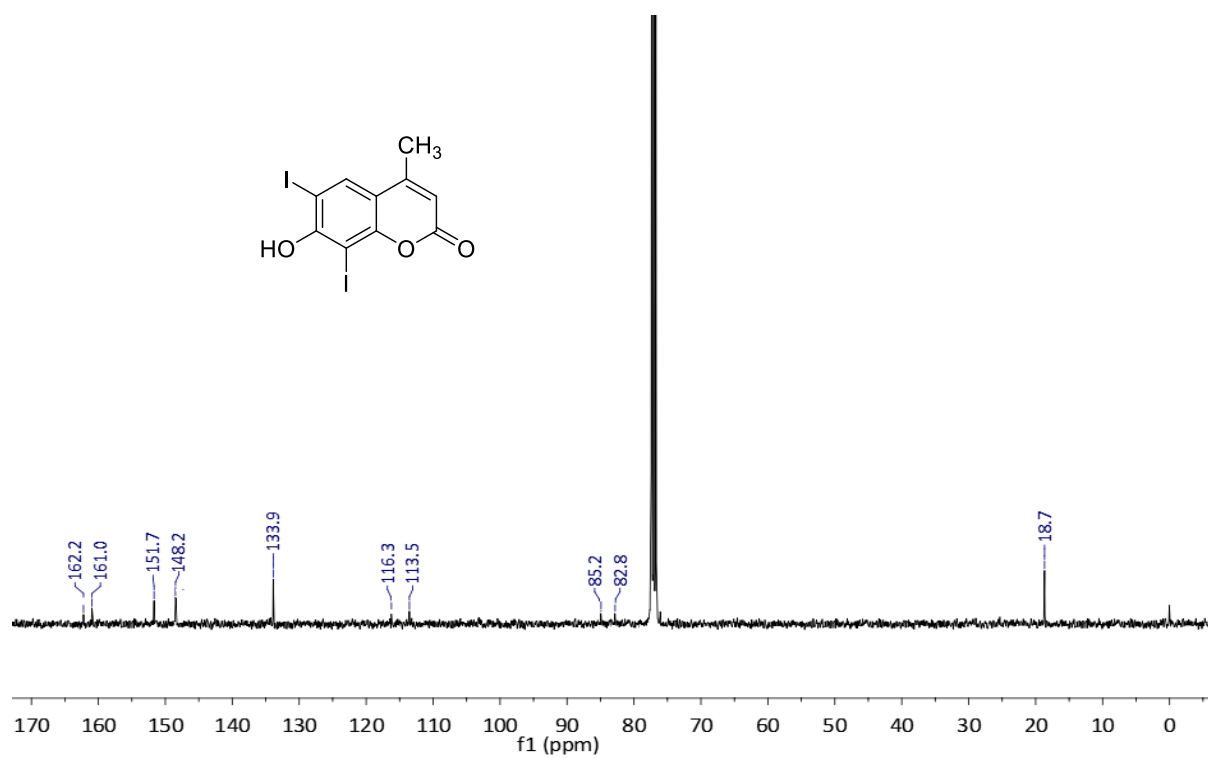

$^{13}\text{C}$  NMR of 28d in  $\text{CDCl}_3$

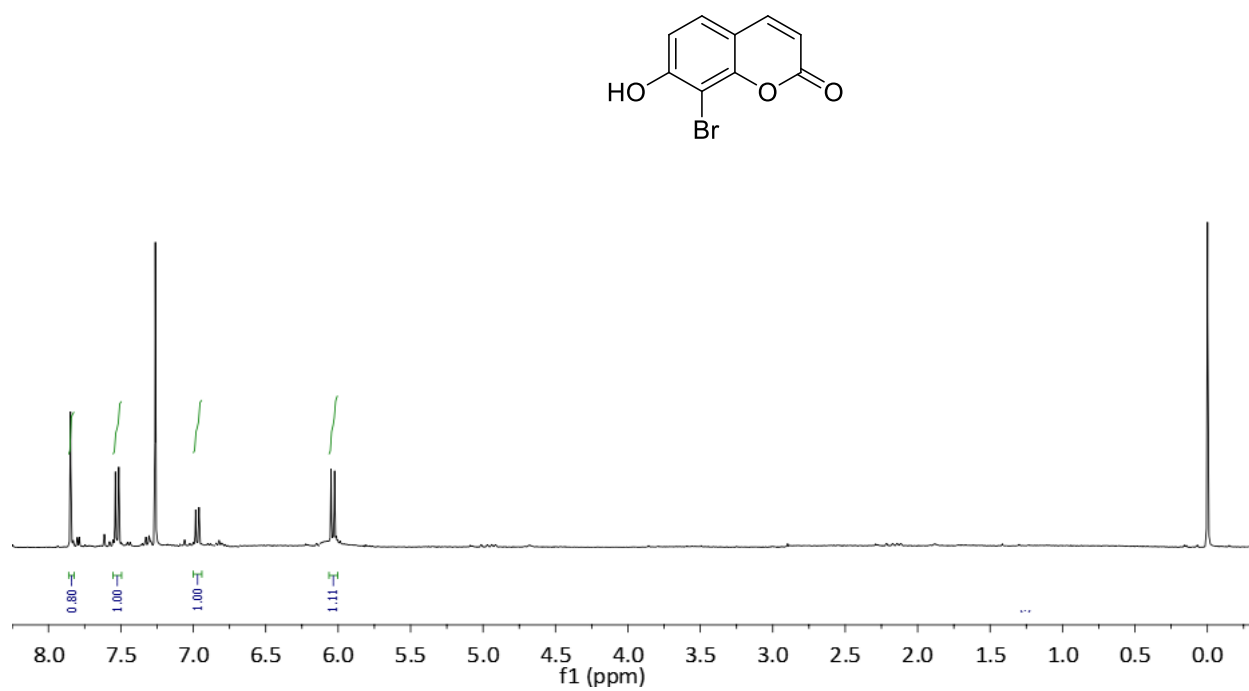

$^1\text{H}$ -NMR of 29a in  $\text{CDCl}_3$

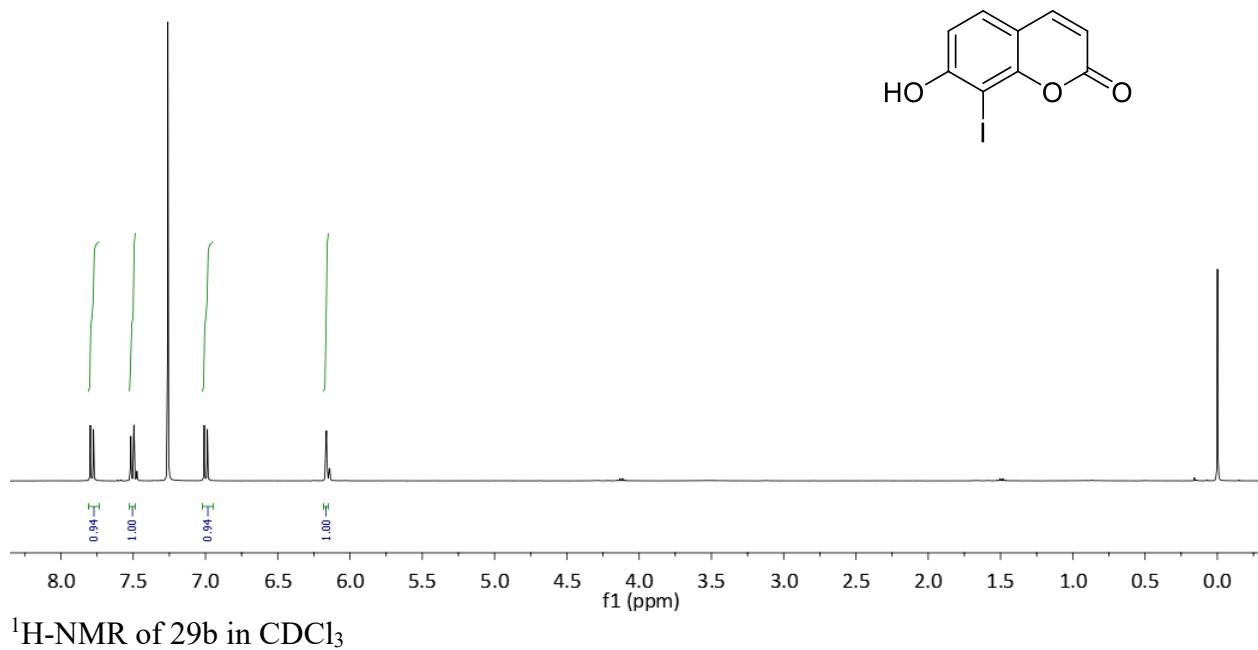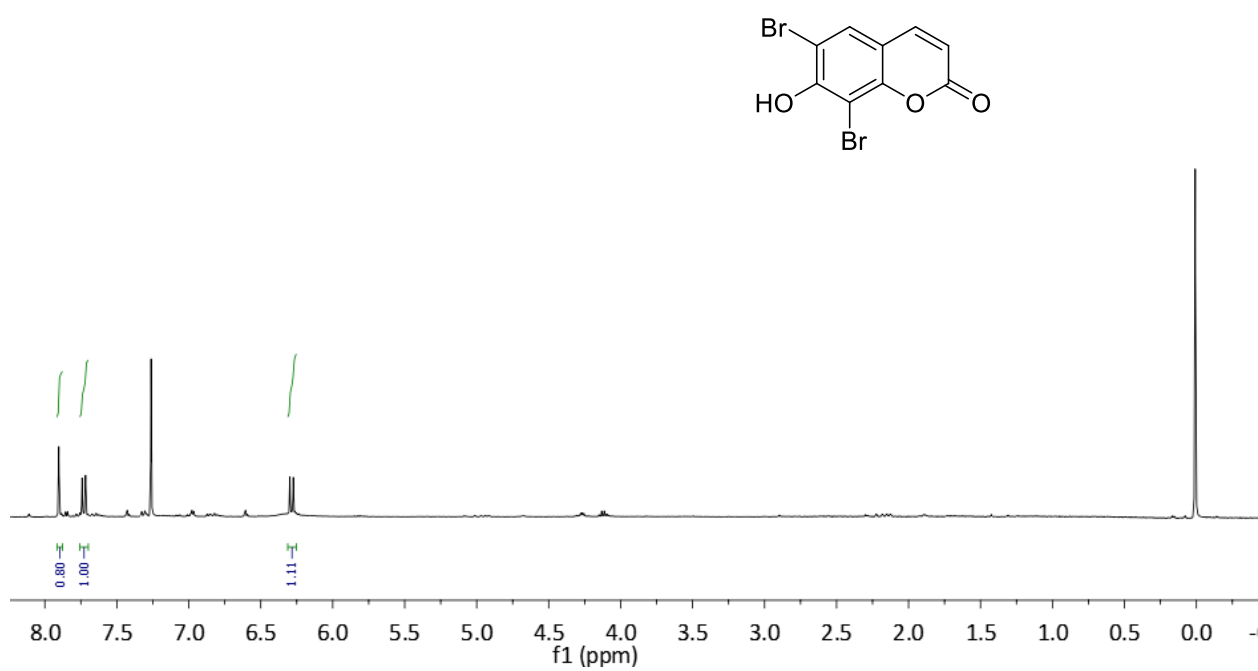



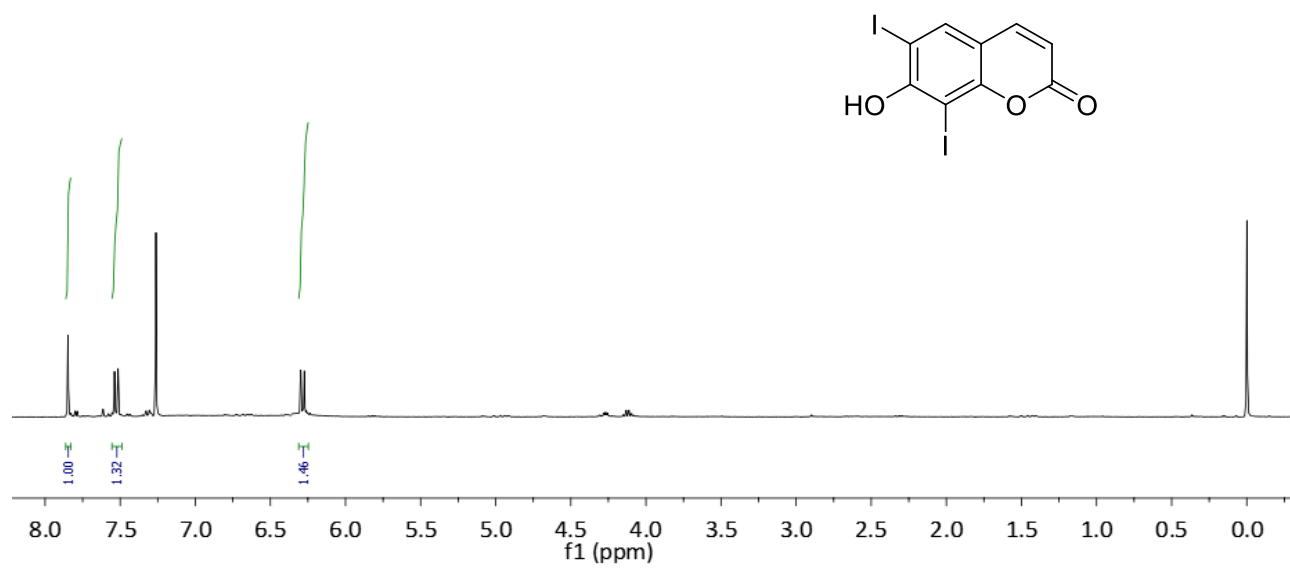

$^1\text{H}$ -NMR of 29d in  $\text{CDCl}_3$

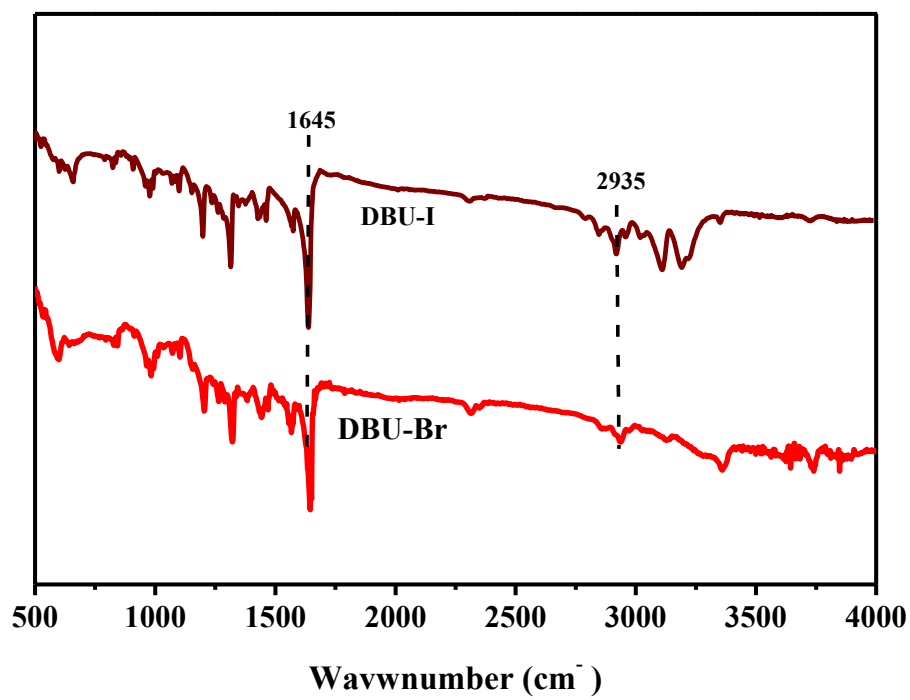

FT-IR spectrum of LBAs of DBU-Br and DBU-I
